# Supplementary material for: Empirical analysis of pig welfare levels and their impact on pig breeding efficiency—Based on 773 pig farmers’ survey data
Source: PubMed Central journal article supplement (PMC5744959; doi:10.1371/journal.pone.0190108), 2017-12-27
Supplement: pone.0190108.s001.pdf [file pone.0190108.s001.pdf]

# S1: Weight analysis results

| Expert No. | B1B2 | B1B3 | B1B4 | B1B5 | B2B1 | B2B3 | B2B4 | B2B5 | B3B1 | B3B2 | B3B4 | B3B5 | B4B1 | B4B2 | B4B3 | B4B5 | B5B1 | B5B2 | B5B3 | B5B4 |
|------------|------|------|------|------|------|------|------|------|------|------|------|------|------|------|------|------|------|------|------|------|
| 1          | 1    | 1/3  | 2    | 3    | 1    | 1    | 2    | 3    | 3    | 1    | 3    | 4    | 1/2  | 1/2  | 1/3  | 1/3  | 1/3  | 1/2  | 1/4  | 3    |
| 2          | 1    | 1/3  | 2    | 3    | 1    | 1    | 2    | 3    | 3    | 1    | 3    | 3    | 1/2  | 1/2  | 1/3  | 1/3  | 1/3  | 1/3  | 1/3  | 3    |
| 3          | 1    | 1/3  | 2    | 3    | 1    | 1    | 2    | 3    | 3    | 1    | 3    | 4    | 1/2  | 1/2  | 1/3  | 1/3  | 1/3  | 1/3  | 1/4  | 3    |
| 4          | 1    | 1/3  | 2    | 3    | 1    | 1    | 2    | 2    | 3    | 1    | 3    | 3    | 1/2  | 1/2  | 1/3  | 1/2  | 1/3  | 1/2  | 1/3  | 2    |
| 5          | 1    | 1/3  | 2    | 3    | 1    | 1    | 2    | 2    | 3    | 1    | 3    | 4    | 1/2  | 1/2  | 1/3  | 1/2  | 1/3  | 1/2  | 1/3  | 2    |
| 6          | 1    | 1/3  | 2    | 3    | 2    | 1    | 2    | 2    | 3    | 1    | 3    | 4    | 1/2  | 1/2  | 1/3  | 1/3  | 1/3  | 1/2  | 1/4  | 3    |
| 7          | 3    | 1/3  | 1    | 3    | 1/3  | 1    | 2    | 2    | 3    | 1    | 3    | 3    | 1    | 1/2  | 1/3  | 1/4  | 1/3  | 1/2  | 1/3  | 4    |
| 8          | 3    | 1/3  | 1    | 3    | 1/2  | 1    | 2    | 2    | 3    | 1    | 3    | 3    | 1    | 1/2  | 1/3  | 1/5  | 1/3  | 1/2  | 1/3  | 5    |
| 9          | 3    | 1/3  | 2    | 3    | 1/2  | 1    | 3    | 2    | 3    | 1    | 3    | 4    | 1/2  | 1/3  | 1/3  | 1/3  | 1/3  | 1/2  | 1/4  | 3    |
| 10         | 2    | 1/3  | 2    | 3    | 1/2  | 1/2  | 3    | 3    | 3    | 2    | 3    | 3    | 1/2  | 1/3  | 1/3  | 1/3  | 1/3  | 1/2  | 1/3  | 3    |
| 11         | 2    | 1/3  | 2    | 3    | 1    | 1    | 1    | 2    | 3    | 1    | 2    | 4    | 1/2  | 1    | 1/2  | 1/3  | 1/3  | 1/2  | 1/4  | 3    |
| 12         | 1    | 1/3  | 2    | 3    | 1    | 1    | 1    | 2    | 3    | 1    | 2    | 3    | 1/2  | 1    | 1/2  | 1/3  | 1/3  | 1/2  | 1/3  | 3    |
| 13         | 1    | 1/3  | 2    | 3    | 1/2  | 1    | 1    | 2    | 3    | 1    | 2    | 3    | 1/2  | 1    | 1/2  | 1/3  | 1/3  | 1/2  | 1/3  | 3    |
| 14         | 1    | 1/3  | 3    | 3    | 1    | 1    | 1    | 2    | 3    | 1    | 3    | 2    | 1/3  | 1    | 1/3  | 1/3  | 1/3  | 1/2  | 1/2  | 3    |
| 15         | 1    | 1/3  | 3    | 3    | 1    | 1    | 1/2  | 3    | 3    | 1    | 3    | 3    | 1/3  | 2    | 1/3  | 1/3  | 1/3  | 1/3  | 1    | 3    |
| 16         | 1    | 1/3  | 2    | 3    | 2    | 1    | 2    | 3    | 2    | 1    | 3    | 1    | 1/2  | 1/2  | 1/3  | 1/3  | 1/3  | 1/3  | 1/3  | 3    |
| 17         | 1    | 1/2  | 2    | 3    | 1    | 1    | 2    | 2    | 1    | 1    | 3    | 3    | 1/2  | 1/2  | 1/3  | 1/3  | 1/3  | 1/2  | 1/3  | 3    |
| 18         | 1    | 1    | 2    | 1    | 1    | 1    | 2    | 2    | 1    | 1    | 3    | 3    | 1/2  | 1/2  | 1/3  | 1/3  | 1    | 1/2  | 1/3  | 3    |
| 19         | 1    | 1    | 2    | 2    | 2    | 1    | 2    | 2    | 1    | 1    | 3    | 2    | 1/2  | 1/2  | 1/3  | 1/3  | 1/2  | 1/2  | 1/2  | 3    |
| 20         | 1/2  | 1    | 2    | 2    | 2    | 1    | 2    | 2    | 1    | 1    | 3    | 3    | 1/2  | 1/2  | 1/3  | 1/3  | 1/2  | 1/2  | 1/3  | 3    |

|    |     |     |   |   |   |   |   |   |     |     |   |   |     |     |     |     |     |     |     |   |
|----|-----|-----|---|---|---|---|---|---|-----|-----|---|---|-----|-----|-----|-----|-----|-----|-----|---|
| 21 | 1/3 | 1   | 2 | 3 | 2 | 2 | 1 | 2 | 1   | 1/2 | 3 | 3 | 1/2 | 2   | 1/3 | 1/3 | 1/3 | 1/2 | 1/3 | 3 |
| 22 | 1/2 | 1/2 | 1 | 3 | 2 | 2 | 2 | 2 | 2   | 1/2 | 3 | 2 | 1   | 1/2 | 1/3 | 1/3 | 1/3 | 1/2 | 1/2 | 3 |
| 23 | 1/3 | 1/3 | 3 | 3 | 3 | 2 | 1 | 2 | 3   | 1/2 | 3 | 2 | 1/3 | 2   | 1/3 | 1/3 | 1/3 | 1/2 | 1/2 | 3 |
| 24 | 1   | 1/3 | 2 | 3 | 1 | 3 | 2 | 2 | 3   | 1/3 | 3 | 3 | 1/2 | 1/2 | 1/3 | 1/2 | 1/3 | 1/2 | 1/3 | 3 |
| 25 | 1   | 1/3 | 2 | 3 | 1 | 1 | 2 | 2 | 3   | 1   | 3 | 3 | 1/2 | 1/2 | 1/3 | 1/2 | 1/3 | 1/2 | 1/3 | 3 |
| 26 | 1   | 1/3 | 2 | 3 | 1 | 2 | 2 | 2 | 3   | 1/2 | 3 | 3 | 1/2 | 1/2 | 1/3 | 1   | 1/3 | 1/2 | 1/3 | 3 |
| 27 | 1   | 1/3 | 2 | 3 | 1 | 1 | 2 | 2 | 3   | 1   | 3 | 3 | 1/2 | 1/2 | 1/3 | 1/3 | 1/3 | 1/2 | 1/3 | 3 |
| 28 | 1   | 1/3 | 2 | 3 | 1 | 1 | 2 | 2 | 3   | 1   | 3 | 3 | 1/2 | 1/2 | 1/3 | 1/3 | 1/3 | 1/2 | 1/3 | 3 |
| 29 | 1   | 1/3 | 2 | 3 | 1 | 1 | 2 | 2 | 3   | 1   | 3 | 3 | 1/2 | 1/2 | 1/3 | 1/3 | 1/3 | 1/2 | 1/3 | 3 |
| 30 | 1   | 1/3 | 2 | 3 | 1 | 1 | 2 | 2 | 3   | 1   | 3 | 3 | 1/2 | 1/2 | 1/3 | 1/3 | 1/3 | 1/2 | 1/3 | 3 |
| 31 | 1   | 1/3 | 2 | 2 | 1 | 1 | 2 | 2 | 3   | 1   | 3 | 3 | 1/2 | 1/2 | 1/3 | 1/3 | 1/2 | 1/2 | 1/3 | 3 |
| 32 | 1   | 1/3 | 2 | 3 | 1 | 1 | 2 | 2 | 3   | 1   | 3 | 3 | 1/2 | 1/2 | 1/3 | 1/3 | 1/3 | 1/2 | 1/3 | 3 |
| 33 | 1   | 1/3 | 2 | 2 | 1 | 1 | 2 | 2 | 3   | 1   | 3 | 3 | 1/2 | 1/2 | 1/3 | 1/3 | 1/3 | 1/2 | 1/3 | 3 |
| 34 | 1   | 1/3 | 2 | 3 | 1 | 1 | 2 | 2 | 3   | 1   | 3 | 3 | 1/2 | 1/2 | 1/3 | 1/3 | 1/3 | 1/2 | 1/3 | 3 |
| 35 | 1   | 1/3 | 2 | 3 | 1 | 1 | 2 | 2 | 3   | 1   | 3 | 3 | 1/2 | 1/2 | 1/3 | 1/3 | 1/2 | 1/2 | 1/3 | 3 |
| 36 | 1   | 1   | 2 | 3 | 1 | 1 | 2 | 2 | 1   | 1   | 3 | 3 | 1/2 | 1/2 | 1/3 | 1/3 | 1/3 | 1/2 | 1/3 | 3 |
| 37 | 1   | 1   | 2 | 2 | 1 | 1 | 2 | 2 | 1   | 1   | 3 | 3 | 1/2 | 1/2 | 1/3 | 1/3 | 1/2 | 1/2 | 1/3 | 3 |
| 38 | 1   | 2   | 2 | 3 | 1 | 1 | 2 | 2 | 1/2 | 1   | 3 | 3 | 1/2 | 1/2 | 1/3 | 1/3 | 1/3 | 1/2 | 1/3 | 3 |
| 39 | 1   | 1/2 | 2 | 3 | 1 | 1 | 2 | 2 | 2   | 1   | 3 | 3 | 1/2 | 1/2 | 1/3 | 1/3 | 1/3 | 1/2 | 1/3 | 3 |
| 40 | 1   | 1/2 | 2 | 1 | 1 | 1 | 2 | 2 | 2   | 1   | 3 | 3 | 1/2 | 1/2 | 1/3 | 1/3 | 1   | 1/2 | 1/3 | 3 |
| 41 | 2   | 1/2 | 2 | 4 | 1 | 1 | 2 | 2 | 2   | 1   | 3 | 3 | 1/2 | 1/2 | 1/3 | 1/3 | 1/4 | 1/2 | 1/3 | 3 |
| 42 | 1   | 1/3 | 2 | 4 | 1 | 2 | 2 | 2 | 3   | 1   | 3 | 3 | 1/2 | 1/2 | 1/3 | 1/3 | 1/4 | 1/2 | 1/3 | 3 |
| 43 | 1   | 1/3 | 2 | 4 | 1 | 2 | 2 | 2 | 3   | 1   | 3 | 3 | 1/2 | 1/2 | 1/3 | 1/3 | 1/4 | 1/2 | 1/3 | 3 |
| 44 | 1   | 1/3 | 2 | 3 | 1 | 2 | 2 | 2 | 3   | 1   | 2 | 3 | 1/2 | 1/2 | 1/3 | 1/3 | 1/3 | 1/2 | 1/3 | 3 |
| 45 | 1   | 1/2 | 1 | 3 | 1 | 2 | 2 | 2 | 3   | 1   | 3 | 3 | 1   | 1/2 | 1/3 | 1/3 | 1/3 | 1/2 | 1/3 | 3 |

|    |   |     |   |   |     |   |   |   |   |   |   |   |     |     |     |     |     |     |     |   |
|----|---|-----|---|---|-----|---|---|---|---|---|---|---|-----|-----|-----|-----|-----|-----|-----|---|
| 46 | 3 | 1/3 | 1 | 2 | 1/2 | 1 | 2 | 2 | 3 | 2 | 3 | 4 | 1   | 1/2 | 1/3 | 1/3 | 1/2 | 1/2 | 1/4 | 3 |
| 47 | 1 | 1   | 1 | 2 | 1   | 2 | 2 | 2 | 1 | 1 | 3 | 4 | 1   | 1/2 | 1/3 | 1/3 | 1/2 | 1/2 | 1/4 | 3 |
| 48 | 1 | 1   | 3 | 3 | 1   | 1 | 2 | 2 | 1 | 1 | 2 | 4 | 1/3 | 1/2 | 1/3 | 1/3 | 1/3 | 1/2 | 1/4 | 3 |
| 49 | 1 | 1/3 | 3 | 3 | 1   | 1 | 2 | 2 | 3 | 1 | 3 | 3 | 1/3 | 1/2 | 1/3 | 1/3 | 1/3 | 1/2 | 1/3 | 3 |
| 50 | 1 | 1/3 | 2 | 3 | 1   | 1 | 2 | 2 | 3 | 1 | 4 | 3 | 1/2 | 1/2 | 1/4 | 1/3 | 1/3 | 1/2 | 1/3 | 3 |
| 51 | 1 | 1/3 | 2 | 3 | 1   | 1 | 2 | 2 | 3 | 1 | 3 | 3 | 1/2 | 1/2 | 1/3 | 1/3 | 1/3 | 1/2 | 1/3 | 3 |
| 52 | 1 | 1/3 | 2 | 3 | 1   | 1 | 2 | 2 | 3 | 1 | 3 | 3 | 1/2 | 1/2 | 1/3 | 1/3 | 1/3 | 1/2 | 1/3 | 3 |
| 53 | 1 | 1/3 | 2 | 2 | 1   | 1 | 2 | 2 | 3 | 1 | 3 | 3 | 1/2 | 1/2 | 1/3 | 1/3 | 1/2 | 1/2 | 1/3 | 3 |
