# Supplementary material for: Empirical analysis of pig welfare levels and their impact on pig breeding efficiency—Based on 773 pig farmers’ survey data
Source: PubMed Central journal article supplement (PMC5744959; doi:10.1371/journal.pone.0190108), 2017-12-27
Supplement: pone.0190108.s002.pdf [file pone.0190108.s002.pdf]

## S2: 773 farmers pig welfare level calculation index

| Sample No. | B1 (21%) |    |    | B2 (23%) |    |    | B3 (34%) |    |    |    | B4 (9%)  |     | B5 (13%) |    | Total score | Scale | Level |
|------------|----------|----|----|----------|----|----|----------|----|----|----|----------|-----|----------|----|-------------|-------|-------|
|            | B1 score | C1 | C2 | B2 score | C3 | C4 | B3 score | C5 | C6 | C7 | B4 score | C8  | B5 score | C9 |             |       |       |
| 1          | 12.60    | 55 | 65 | 17.83    | 80 | 75 | 13.60    | 65 | 0  | 55 | 0.00     | 0   | 7.80     | 60 | 51.83       | 42    | 1     |
| 2          | 13.65    | 60 | 70 | 17.25    | 75 | 75 | 13.03    | 65 | 0  | 50 | 0.00     | 0   | 7.80     | 60 | 51.73       | 75    | 1     |
| 3          | 14.70    | 70 | 70 | 18.40    | 85 | 75 | 17.00    | 75 | 0  | 75 | 2.25     | 25  | 7.80     | 60 | 60.15       | 78    | 2     |
| 4          | 12.60    | 55 | 65 | 17.83    | 80 | 75 | 12.47    | 65 | 0  | 45 | 0.00     | 0   | 7.80     | 60 | 50.69       | 89    | 1     |
| 5          | 12.60    | 55 | 65 | 18.40    | 85 | 75 | 13.60    | 65 | 0  | 55 | 0.00     | 0   | 7.80     | 60 | 52.40       | 91    | 1     |
| 6          | 14.70    | 70 | 70 | 15.53    | 65 | 70 | 19.83    | 80 | 25 | 70 | 4.50     | 50  | 8.45     | 65 | 63.01       | 334   | 2     |
| 7          | 14.70    | 70 | 70 | 15.53    | 70 | 65 | 22.67    | 80 | 50 | 70 | 4.50     | 50  | 8.45     | 65 | 65.84       | 446   | 2     |
| 8          | 14.70    | 70 | 70 | 14.95    | 65 | 65 | 20.97    | 85 | 25 | 75 | 4.50     | 50  | 9.10     | 70 | 64.22       | 532   | 2     |
| 9          | 14.70    | 70 | 70 | 15.53    | 65 | 70 | 20.40    | 80 | 25 | 75 | 4.50     | 50  | 8.45     | 65 | 63.58       | 641   | 2     |
| 10         | 15.75    | 75 | 75 | 16.68    | 70 | 75 | 19.83    | 80 | 25 | 70 | 6.75     | 75  | 8.45     | 65 | 67.46       | 783   | 2     |
| 11         | 15.75    | 75 | 75 | 17.25    | 75 | 75 | 23.80    | 85 | 50 | 75 | 4.50     | 50  | 8.45     | 65 | 69.75       | 806   | 2     |
| 12         | 15.75    | 75 | 75 | 16.68    | 75 | 70 | 26.63    | 80 | 75 | 80 | 6.75     | 75  | 9.75     | 75 | 75.56       | 1269  | 3     |
| 13         | 18.38    | 85 | 90 | 17.83    | 75 | 80 | 27.77    | 85 | 75 | 85 | 6.75     | 75  | 9.75     | 75 | 80.47       | 1341  | 3     |
| 14         | 16.80    | 80 | 80 | 14.38    | 60 | 65 | 26.07    | 85 | 75 | 70 | 6.75     | 75  | 9.75     | 75 | 73.74       | 1555  | 2     |
| 15         | 16.80    | 80 | 80 | 14.95    | 65 | 65 | 26.07    | 85 | 75 | 70 | 4.50     | 50  | 9.75     | 75 | 72.07       | 1603  | 2     |
| 16         | 13.65    | 65 | 65 | 14.38    | 60 | 65 | 26.07    | 75 | 75 | 80 | 6.75     | 75  | 9.10     | 70 | 69.94       | 1776  | 2     |
| 17         | 17.33    | 80 | 85 | 16.68    | 70 | 75 | 26.63    | 80 | 75 | 80 | 6.75     | 75  | 10.40    | 80 | 77.78       | 1897  | 3     |
| 18         | 17.85    | 85 | 85 | 18.40    | 75 | 85 | 29.47    | 90 | 80 | 90 | 9.00     | 100 | 11.05    | 85 | 85.77       | 2367  | 4     |
| 19         | 11.55    | 55 | 55 | 17.83    | 80 | 75 | 12.47    | 65 | 0  | 45 | 2.25     | 25  | 7.80     | 60 | 51.89       | 38    | 1     |
| 20         | 13.65    | 60 | 70 | 17.83    | 80 | 75 | 11.90    | 50 | 0  | 55 | 0.00     | 0   | 8.45     | 65 | 51.83       | 67    | 1     |
| 21         | 15.23    | 70 | 75 | 14.38    | 60 | 65 | 25.50    | 85 | 75 | 65 | 0.00     | 0   | 9.10     | 70 | 64.20       | 75    | 2     |

|    |       |    |    |       |    |    |       |    |    |    |      |    |       |    |       |      |   |
|----|-------|----|----|-------|----|----|-------|----|----|----|------|----|-------|----|-------|------|---|
| 22 | 13.65 | 60 | 70 | 17.25 | 75 | 75 | 12.47 | 60 | 0  | 50 | 0.00 | 0  | 7.80  | 60 | 51.17 | 82   | 1 |
| 23 | 13.65 | 60 | 70 | 17.25 | 75 | 75 | 16.43 | 65 | 25 | 55 | 0.00 | 0  | 7.80  | 60 | 55.13 | 128  | 1 |
| 24 | 14.18 | 65 | 70 | 17.25 | 75 | 75 | 17.57 | 70 | 25 | 60 | 2.25 | 25 | 8.45  | 65 | 59.69 | 245  | 1 |
| 25 | 16.80 | 75 | 85 | 14.95 | 65 | 65 | 20.40 | 80 | 25 | 75 | 4.50 | 50 | 9.10  | 70 | 65.75 | 467  | 2 |
| 26 | 14.18 | 55 | 80 | 15.53 | 70 | 65 | 24.37 | 65 | 75 | 75 | 4.50 | 50 | 9.75  | 75 | 68.32 | 523  | 2 |
| 27 | 12.08 | 50 | 65 | 14.38 | 60 | 65 | 24.37 | 65 | 75 | 75 | 4.50 | 50 | 9.75  | 75 | 65.07 | 655  | 2 |
| 28 | 14.18 | 70 | 65 | 14.95 | 65 | 65 | 20.40 | 80 | 25 | 75 | 4.50 | 50 | 9.75  | 75 | 63.78 | 860  | 2 |
| 29 | 11.55 | 45 | 65 | 13.23 | 50 | 65 | 20.97 | 80 | 25 | 80 | 6.75 | 75 | 9.10  | 70 | 61.59 | 1120 | 2 |
| 30 | 12.60 | 65 | 55 | 12.65 | 45 | 65 | 25.50 | 70 | 75 | 80 | 6.75 | 75 | 9.75  | 75 | 67.25 | 1185 | 2 |
| 31 | 13.13 | 65 | 60 | 12.65 | 45 | 65 | 24.93 | 70 | 75 | 75 | 0.00 | 0  | 10.40 | 80 | 61.11 | 1240 | 2 |
| 32 | 16.28 | 75 | 80 | 16.68 | 70 | 75 | 25.50 | 80 | 70 | 75 | 6.75 | 75 | 10.40 | 80 | 75.60 | 1420 | 3 |
| 33 | 16.80 | 85 | 75 | 16.10 | 65 | 75 | 26.63 | 80 | 75 | 80 | 6.75 | 75 | 11.05 | 85 | 77.33 | 1450 | 3 |
| 34 | 12.08 | 60 | 55 | 17.83 | 75 | 80 | 13.03 | 65 | 0  | 50 | 0.00 | 0  | 7.80  | 60 | 50.73 | 35   | 1 |
| 35 | 14.18 | 60 | 75 | 17.83 | 75 | 80 | 13.03 | 65 | 0  | 50 | 0.00 | 0  | 7.80  | 60 | 52.83 | 40   | 1 |
| 36 | 13.65 | 60 | 70 | 17.83 | 75 | 80 | 13.03 | 65 | 0  | 50 | 0.00 | 0  | 7.80  | 60 | 52.31 | 43   | 1 |
| 37 | 13.65 | 60 | 70 | 17.25 | 75 | 75 | 13.03 | 65 | 0  | 50 | 0.00 | 0  | 7.80  | 60 | 51.73 | 51   | 1 |
| 38 | 12.60 | 60 | 60 | 17.25 | 75 | 75 | 12.47 | 60 | 0  | 50 | 0.00 | 0  | 7.80  | 60 | 50.12 | 56   | 1 |
| 39 | 15.23 | 65 | 80 | 15.53 | 70 | 65 | 25.50 | 75 | 75 | 75 | 0.00 | 0  | 9.10  | 70 | 65.35 | 68   | 2 |
| 40 | 13.65 | 60 | 70 | 17.25 | 75 | 75 | 13.03 | 65 | 0  | 50 | 0.00 | 0  | 7.80  | 60 | 51.73 | 70   | 1 |
| 41 | 13.65 | 60 | 70 | 17.25 | 75 | 75 | 13.03 | 65 | 0  | 50 | 0.00 | 0  | 7.80  | 60 | 51.73 | 76   | 1 |
| 42 | 13.65 | 60 | 70 | 17.25 | 75 | 75 | 13.03 | 65 | 0  | 50 | 2.25 | 25 | 7.80  | 60 | 53.98 | 85   | 1 |
| 43 | 14.18 | 60 | 75 | 17.25 | 75 | 75 | 13.60 | 65 | 0  | 55 | 0.00 | 0  | 7.80  | 60 | 52.83 | 110  | 1 |
| 44 | 14.18 | 65 | 70 | 17.25 | 75 | 75 | 16.43 | 65 | 25 | 55 | 0.00 | 0  | 8.45  | 65 | 56.31 | 325  | 1 |
| 45 | 15.23 | 70 | 75 | 14.38 | 60 | 65 | 26.63 | 85 | 75 | 75 | 4.50 | 50 | 9.75  | 75 | 70.48 | 480  | 2 |
| 46 | 14.18 | 55 | 80 | 14.38 | 60 | 65 | 19.27 | 70 | 25 | 75 | 4.50 | 50 | 9.75  | 75 | 62.07 | 550  | 2 |

|    |       |    |    |       |    |    |       |    |    |    |      |     |       |    |       |      |   |
|----|-------|----|----|-------|----|----|-------|----|----|----|------|-----|-------|----|-------|------|---|
| 47 | 13.65 | 60 | 70 | 14.38 | 60 | 65 | 20.40 | 80 | 25 | 75 | 4.50 | 50  | 9.75  | 75 | 62.68 | 620  | 2 |
| 48 | 14.18 | 65 | 70 | 13.23 | 50 | 65 | 19.83 | 75 | 25 | 75 | 4.50 | 50  | 10.40 | 80 | 62.13 | 890  | 2 |
| 49 | 17.33 | 80 | 85 | 19.55 | 85 | 85 | 28.90 | 85 | 80 | 90 | 9.00 | 100 | 11.05 | 85 | 85.83 | 4200 | 4 |
| 50 | 17.85 | 80 | 90 | 19.55 | 85 | 85 | 29.47 | 90 | 80 | 90 | 9.00 | 100 | 11.05 | 85 | 86.92 | 6600 | 4 |
| 51 | 13.13 | 55 | 70 | 16.68 | 80 | 65 | 11.90 | 60 | 0  | 45 | 0.00 | 0   | 8.45  | 65 | 50.15 | 45   | 1 |
| 52 | 13.13 | 60 | 65 | 16.10 | 75 | 65 | 13.60 | 65 | 0  | 55 | 0.00 | 0   | 7.80  | 60 | 50.63 | 48   | 1 |
| 53 | 12.60 | 55 | 65 | 17.25 | 75 | 75 | 13.03 | 60 | 0  | 55 | 0.00 | 0   | 7.80  | 60 | 50.68 | 55   | 1 |
| 54 | 13.13 | 60 | 65 | 17.25 | 75 | 75 | 14.17 | 65 | 0  | 60 | 0.00 | 0   | 7.15  | 55 | 51.69 | 56   | 1 |
| 55 | 13.13 | 60 | 65 | 17.25 | 75 | 75 | 13.60 | 65 | 0  | 55 | 0.00 | 0   | 7.80  | 60 | 51.78 | 69   | 1 |
| 56 | 12.08 | 55 | 60 | 17.25 | 75 | 75 | 13.03 | 65 | 0  | 50 | 0.00 | 0   | 8.45  | 65 | 50.81 | 78   | 1 |
| 57 | 16.28 | 85 | 70 | 13.80 | 55 | 65 | 20.97 | 85 | 25 | 75 | 0.00 | 0   | 9.75  | 75 | 60.79 | 79   | 2 |
| 58 | 13.65 | 65 | 65 | 17.25 | 75 | 75 | 12.47 | 65 | 0  | 45 | 2.25 | 25  | 7.80  | 60 | 53.42 | 86   | 1 |
| 59 | 14.70 | 70 | 70 | 14.95 | 65 | 65 | 18.70 | 75 | 25 | 65 | 2.25 | 25  | 8.45  | 65 | 59.05 | 310  | 1 |
| 60 | 13.13 | 60 | 65 | 14.38 | 60 | 65 | 26.07 | 80 | 75 | 75 | 4.50 | 50  | 9.10  | 70 | 67.17 | 460  | 2 |
| 61 | 14.70 | 75 | 65 | 14.95 | 65 | 65 | 26.07 | 80 | 75 | 75 | 4.50 | 50  | 9.75  | 75 | 69.97 | 540  | 2 |
| 62 | 12.08 | 65 | 50 | 13.80 | 55 | 65 | 20.97 | 85 | 25 | 75 | 4.50 | 50  | 9.75  | 75 | 61.09 | 680  | 2 |
| 63 | 11.55 | 55 | 55 | 13.23 | 50 | 65 | 27.20 | 85 | 75 | 80 | 4.50 | 50  | 9.75  | 75 | 66.23 | 830  | 2 |
| 64 | 17.33 | 80 | 85 | 18.98 | 80 | 85 | 29.47 | 90 | 80 | 90 | 9.00 | 100 | 10.40 | 80 | 85.17 | 5500 | 4 |
| 65 | 12.60 | 65 | 55 | 17.83 | 75 | 80 | 13.03 | 65 | 0  | 50 | 0.00 | 0   | 7.80  | 60 | 51.26 | 45   | 1 |
| 66 | 13.65 | 60 | 70 | 17.25 | 75 | 75 | 13.60 | 65 | 0  | 55 | 0.00 | 0   | 8.45  | 65 | 52.95 | 55   | 1 |
| 67 | 13.65 | 60 | 70 | 18.40 | 80 | 80 | 12.47 | 60 | 0  | 50 | 2.25 | 25  | 7.80  | 60 | 54.57 | 58   | 1 |
| 68 | 13.13 | 60 | 65 | 15.53 | 75 | 60 | 14.17 | 65 | 0  | 60 | 0.00 | 0   | 7.80  | 60 | 50.62 | 64   | 1 |
| 69 | 12.60 | 60 | 60 | 16.10 | 75 | 65 | 13.03 | 65 | 0  | 50 | 0.00 | 0   | 7.80  | 60 | 49.53 | 66   | 1 |
| 70 | 13.65 | 60 | 70 | 17.25 | 75 | 75 | 13.03 | 65 | 0  | 50 | 0.00 | 0   | 7.80  | 60 | 51.73 | 72   | 1 |
| 71 | 14.70 | 75 | 65 | 16.10 | 75 | 65 | 13.03 | 65 | 0  | 50 | 2.25 | 25  | 9.10  | 70 | 55.18 | 78   | 1 |

|    |       |    |    |       |    |    |       |    |    |    |      |     |       |    |       |      |   |
|----|-------|----|----|-------|----|----|-------|----|----|----|------|-----|-------|----|-------|------|---|
| 72 | 13.13 | 60 | 65 | 16.10 | 75 | 65 | 13.03 | 65 | 0  | 50 | 0.00 | 0   | 7.80  | 60 | 50.06 | 80   | 1 |
| 73 | 16.28 | 70 | 85 | 16.68 | 70 | 75 | 23.80 | 85 | 50 | 75 | 0.00 | 0   | 9.75  | 75 | 66.50 | 93   | 2 |
| 74 | 12.08 | 50 | 65 | 17.83 | 80 | 75 | 12.47 | 65 | 0  | 45 | 0.00 | 0   | 7.80  | 60 | 50.17 | 206  | 1 |
| 75 | 13.65 | 60 | 70 | 14.38 | 60 | 65 | 21.53 | 65 | 50 | 75 | 4.50 | 50  | 9.75  | 75 | 63.81 | 334  | 2 |
| 76 | 15.23 | 75 | 70 | 14.38 | 60 | 65 | 23.80 | 85 | 50 | 75 | 4.50 | 50  | 9.75  | 75 | 67.65 | 455  | 2 |
| 77 | 14.18 | 65 | 70 | 14.38 | 60 | 65 | 23.23 | 80 | 50 | 75 | 4.50 | 50  | 9.75  | 75 | 66.03 | 582  | 2 |
| 78 | 14.70 | 70 | 70 | 14.95 | 65 | 65 | 26.63 | 85 | 75 | 75 | 4.50 | 50  | 9.75  | 75 | 70.53 | 627  | 2 |
| 79 | 14.18 | 65 | 70 | 13.80 | 55 | 65 | 26.07 | 75 | 75 | 80 | 4.50 | 50  | 9.75  | 75 | 68.29 | 768  | 2 |
| 80 | 14.70 | 65 | 75 | 13.23 | 50 | 65 | 27.20 | 85 | 75 | 80 | 4.50 | 50  | 9.75  | 75 | 69.38 | 850  | 2 |
| 81 | 18.38 | 90 | 85 | 20.13 | 90 | 85 | 29.47 | 90 | 80 | 90 | 9.00 | 100 | 11.05 | 85 | 88.02 | 7500 | 4 |
| 82 | 13.65 | 65 | 65 | 16.68 | 70 | 75 | 11.90 | 60 | 0  | 45 | 0.00 | 0   | 8.45  | 65 | 50.68 | 38   | 1 |
| 83 | 13.13 | 60 | 65 | 16.10 | 70 | 70 | 13.03 | 60 | 0  | 55 | 0.00 | 0   | 7.80  | 60 | 50.06 | 48   | 1 |
| 84 | 14.18 | 65 | 70 | 17.25 | 75 | 75 | 12.47 | 65 | 0  | 45 | 0.00 | 0   | 8.45  | 65 | 52.34 | 60   | 1 |
| 85 | 12.60 | 55 | 65 | 17.83 | 85 | 70 | 13.60 | 65 | 0  | 55 | 2.25 | 25  | 7.80  | 60 | 54.08 | 80   | 1 |
| 86 | 12.08 | 55 | 60 | 16.68 | 75 | 70 | 13.03 | 65 | 0  | 50 | 0.00 | 0   | 9.10  | 70 | 50.88 | 85   | 1 |
| 87 | 11.55 | 55 | 55 | 18.40 | 85 | 75 | 12.47 | 65 | 0  | 45 | 0.00 | 0   | 9.10  | 70 | 51.52 | 85   | 1 |
| 88 | 13.65 | 60 | 70 | 16.68 | 70 | 75 | 13.60 | 65 | 0  | 55 | 2.25 | 25  | 8.45  | 65 | 54.63 | 91   | 1 |
| 89 | 14.18 | 70 | 65 | 13.23 | 55 | 60 | 16.43 | 75 | 0  | 70 | 0.00 | 0   | 9.10  | 70 | 52.93 | 220  | 1 |
| 90 | 14.70 | 70 | 70 | 12.08 | 50 | 55 | 19.83 | 75 | 25 | 75 | 2.25 | 25  | 8.45  | 65 | 57.31 | 240  | 1 |
| 91 | 13.13 | 60 | 65 | 14.38 | 60 | 65 | 24.93 | 70 | 75 | 75 | 4.50 | 50  | 9.75  | 75 | 66.68 | 320  | 2 |
| 92 | 14.70 | 80 | 60 | 14.38 | 60 | 65 | 26.63 | 85 | 75 | 75 | 4.50 | 50  | 9.75  | 75 | 69.96 | 470  | 2 |
| 93 | 11.55 | 55 | 55 | 14.38 | 60 | 65 | 20.97 | 85 | 25 | 75 | 4.50 | 50  | 9.75  | 75 | 61.14 | 530  | 2 |
| 94 | 11.03 | 50 | 55 | 12.65 | 45 | 65 | 23.80 | 80 | 50 | 80 | 4.50 | 50  | 9.75  | 75 | 61.73 | 860  | 2 |
| 95 | 15.75 | 70 | 80 | 17.25 | 75 | 75 | 26.63 | 80 | 75 | 80 | 4.50 | 50  | 11.05 | 85 | 75.18 | 1350 | 3 |
| 96 | 16.80 | 85 | 75 | 16.68 | 70 | 75 | 26.63 | 80 | 75 | 80 | 4.50 | 50  | 11.05 | 85 | 75.66 | 1470 | 3 |

|     |       |    |    |       |    |    |       |     |    |     |      |     |       |    |       |       |   |
|-----|-------|----|----|-------|----|----|-------|-----|----|-----|------|-----|-------|----|-------|-------|---|
| 97  | 16.28 | 80 | 75 | 16.68 | 70 | 75 | 26.63 | 80  | 75 | 80  | 4.50 | 50  | 11.05 | 85 | 75.13 | 1620  | 3 |
| 98  | 17.33 | 85 | 80 | 16.10 | 65 | 75 | 26.63 | 80  | 75 | 80  | 6.75 | 75  | 11.05 | 85 | 77.86 | 1850  | 3 |
| 99  | 12.60 | 60 | 60 | 13.80 | 55 | 65 | 13.60 | 65  | 0  | 55  | 0.00 | 0   | 8.45  | 65 | 48.45 | 40    | 1 |
| 100 | 14.70 | 65 | 75 | 14.38 | 60 | 65 | 13.60 | 65  | 0  | 55  | 0.00 | 0   | 7.80  | 60 | 50.48 | 55    | 1 |
| 101 | 11.55 | 45 | 65 | 15.53 | 70 | 65 | 13.60 | 65  | 0  | 55  | 0.00 | 0   | 8.45  | 65 | 49.13 | 75    | 1 |
| 102 | 14.70 | 65 | 75 | 13.80 | 50 | 70 | 13.60 | 65  | 0  | 55  | 0.00 | 0   | 8.45  | 65 | 50.55 | 160   | 1 |
| 103 | 13.13 | 60 | 65 | 15.53 | 70 | 65 | 20.97 | 85  | 25 | 75  | 4.50 | 50  | 9.10  | 70 | 63.22 | 280   | 2 |
| 104 | 15.23 | 70 | 75 | 14.38 | 60 | 65 | 20.97 | 85  | 25 | 75  | 4.50 | 50  | 9.75  | 75 | 64.82 | 340   | 2 |
| 105 | 11.55 | 65 | 45 | 14.95 | 65 | 65 | 20.40 | 80  | 25 | 75  | 4.50 | 50  | 9.10  | 70 | 60.50 | 460   | 2 |
| 106 | 12.60 | 65 | 55 | 13.80 | 55 | 65 | 14.17 | 70  | 0  | 55  | 0.00 | 0   | 8.45  | 65 | 49.02 | 530   | 1 |
| 107 | 13.13 | 75 | 50 | 14.38 | 60 | 65 | 20.97 | 85  | 25 | 75  | 4.50 | 50  | 9.10  | 70 | 62.07 | 620   | 2 |
| 108 | 15.23 | 85 | 60 | 14.38 | 60 | 65 | 20.97 | 85  | 25 | 75  | 4.50 | 50  | 9.10  | 70 | 64.17 | 750   | 2 |
| 109 | 11.03 | 50 | 55 | 14.38 | 60 | 65 | 24.93 | 65  | 75 | 80  | 4.50 | 50  | 9.75  | 75 | 64.58 | 1050  | 2 |
| 110 | 11.55 | 70 | 40 | 12.65 | 45 | 65 | 27.20 | 85  | 75 | 80  | 4.50 | 50  | 9.75  | 75 | 65.65 | 1100  | 2 |
| 111 | 15.75 | 75 | 75 | 13.23 | 50 | 65 | 27.20 | 85  | 75 | 80  | 4.50 | 50  | 9.75  | 75 | 70.43 | 1400  | 2 |
| 112 | 13.65 | 55 | 75 | 12.08 | 40 | 65 | 21.53 | 85  | 25 | 80  | 4.50 | 50  | 9.75  | 75 | 61.51 | 1700  | 2 |
| 113 | 13.13 | 60 | 65 | 12.08 | 40 | 65 | 27.20 | 85  | 75 | 80  | 4.50 | 50  | 9.75  | 75 | 66.65 | 1750  | 2 |
| 114 | 17.33 | 80 | 85 | 16.68 | 70 | 75 | 26.63 | 80  | 75 | 80  | 4.50 | 50  | 10.40 | 80 | 75.53 | 1820  | 3 |
| 115 | 17.33 | 85 | 80 | 16.10 | 55 | 85 | 25.50 | 80  | 75 | 70  | 9.00 | 100 | 10.40 | 80 | 78.33 | 2100  | 3 |
| 116 | 18.90 | 95 | 85 | 18.40 | 75 | 85 | 33.43 | 100 | 95 | 100 | 9.00 | 100 | 12.35 | 95 | 92.08 | 32000 | 4 |
| 117 | 11.55 | 50 | 60 | 14.38 | 65 | 60 | 10.77 | 65  | 0  | 30  | 0.00 | 0   | 7.15  | 55 | 43.84 | 35    | 1 |
| 118 | 13.13 | 65 | 60 | 14.38 | 60 | 65 | 11.33 | 65  | 0  | 35  | 2.25 | 25  | 7.15  | 55 | 48.23 | 38    | 1 |
| 119 | 11.55 | 50 | 60 | 13.23 | 50 | 65 | 12.47 | 55  | 0  | 55  | 0.00 | 0   | 8.45  | 65 | 45.69 | 50    | 1 |
| 120 | 14.70 | 65 | 75 | 14.38 | 60 | 65 | 13.03 | 60  | 0  | 55  | 0.00 | 0   | 8.45  | 65 | 50.56 | 62    | 1 |
| 121 | 16.80 | 80 | 80 | 14.38 | 60 | 65 | 23.23 | 85  | 75 | 45  | 0.00 | 0   | 9.10  | 70 | 63.51 | 68    | 2 |

|     |       |    |    |       |    |    |       |    |    |    |      |     |       |    |       |      |   |
|-----|-------|----|----|-------|----|----|-------|----|----|----|------|-----|-------|----|-------|------|---|
| 122 | 14.70 | 70 | 70 | 13.23 | 60 | 55 | 13.60 | 65 | 0  | 55 | 0.00 | 0   | 9.10  | 70 | 50.63 | 75   | 1 |
| 123 | 11.03 | 55 | 50 | 14.38 | 60 | 65 | 13.03 | 70 | 0  | 45 | 0.00 | 0   | 7.80  | 60 | 46.23 | 85   | 1 |
| 124 | 14.18 | 65 | 70 | 15.53 | 70 | 65 | 18.70 | 75 | 25 | 65 | 2.25 | 25  | 8.45  | 65 | 59.10 | 245  | 1 |
| 125 | 15.23 | 70 | 75 | 13.80 | 55 | 65 | 23.80 | 85 | 75 | 50 | 4.50 | 50  | 9.10  | 70 | 66.43 | 352  | 2 |
| 126 | 15.23 | 80 | 65 | 15.53 | 70 | 65 | 25.50 | 80 | 75 | 70 | 4.50 | 50  | 9.10  | 70 | 69.85 | 468  | 2 |
| 127 | 13.13 | 65 | 60 | 13.80 | 55 | 65 | 25.50 | 75 | 75 | 75 | 4.50 | 50  | 9.10  | 70 | 66.03 | 577  | 2 |
| 128 | 11.55 | 55 | 55 | 15.53 | 70 | 65 | 20.97 | 85 | 25 | 75 | 4.50 | 50  | 9.10  | 70 | 61.64 | 693  | 2 |
| 129 | 12.08 | 60 | 55 | 14.38 | 60 | 65 | 20.40 | 80 | 25 | 75 | 4.50 | 50  | 9.75  | 75 | 61.10 | 707  | 2 |
| 130 | 17.85 | 85 | 85 | 16.68 | 70 | 75 | 26.63 | 80 | 75 | 80 | 4.50 | 50  | 10.40 | 80 | 76.06 | 736  | 3 |
| 131 | 13.65 | 65 | 65 | 14.38 | 60 | 65 | 20.97 | 85 | 25 | 75 | 4.50 | 50  | 9.75  | 75 | 63.24 | 752  | 2 |
| 132 | 14.70 | 85 | 55 | 13.23 | 50 | 65 | 18.13 | 80 | 25 | 55 | 4.50 | 50  | 9.75  | 75 | 60.31 | 780  | 2 |
| 133 | 17.85 | 80 | 90 | 17.25 | 75 | 75 | 26.07 | 80 | 75 | 75 | 4.50 | 50  | 10.40 | 80 | 76.07 | 860  | 3 |
| 134 | 17.33 | 85 | 80 | 19.55 | 85 | 85 | 29.47 | 90 | 80 | 90 | 9.00 | 100 | 11.05 | 85 | 86.39 | 3750 | 4 |
| 135 | 10.50 | 55 | 45 | 15.53 | 70 | 65 | 10.77 | 65 | 0  | 30 | 0.00 | 0   | 8.45  | 65 | 45.24 | 32   | 1 |
| 136 | 9.98  | 50 | 45 | 15.53 | 70 | 65 | 14.73 | 65 | 0  | 65 | 0.00 | 0   | 8.45  | 65 | 48.68 | 38   | 1 |
| 137 | 13.13 | 55 | 70 | 15.53 | 70 | 65 | 13.03 | 65 | 0  | 50 | 0.00 | 0   | 7.80  | 60 | 49.48 | 46   | 1 |
| 138 | 12.08 | 60 | 55 | 15.53 | 70 | 65 | 11.90 | 65 | 0  | 40 | 0.00 | 0   | 9.10  | 70 | 48.60 | 47   | 1 |
| 139 | 9.98  | 45 | 50 | 15.53 | 70 | 65 | 14.17 | 65 | 0  | 60 | 0.00 | 0   | 9.10  | 70 | 48.77 | 60   | 1 |
| 140 | 12.08 | 65 | 50 | 15.53 | 70 | 65 | 13.03 | 65 | 0  | 50 | 0.00 | 0   | 9.75  | 75 | 50.38 | 65   | 1 |
| 141 | 13.13 | 75 | 50 | 14.38 | 60 | 65 | 24.93 | 85 | 75 | 60 | 4.50 | 50  | 8.45  | 65 | 65.38 | 83   | 2 |
| 142 | 13.65 | 70 | 60 | 14.38 | 60 | 65 | 12.47 | 65 | 0  | 45 | 2.25 | 25  | 8.45  | 65 | 51.19 | 180  | 1 |
| 143 | 12.60 | 55 | 65 | 14.95 | 65 | 65 | 10.77 | 65 | 0  | 30 | 2.25 | 25  | 7.80  | 60 | 48.37 | 240  | 1 |
| 144 | 11.03 | 60 | 45 | 13.80 | 55 | 65 | 11.33 | 65 | 0  | 35 | 2.25 | 25  | 8.45  | 65 | 46.86 | 260  | 1 |
| 145 | 14.70 | 70 | 70 | 14.38 | 60 | 65 | 26.07 | 80 | 75 | 75 | 4.50 | 50  | 9.10  | 70 | 68.74 | 370  | 2 |
| 146 | 12.60 | 55 | 65 | 13.80 | 55 | 65 | 26.63 | 85 | 75 | 75 | 4.50 | 50  | 9.10  | 70 | 66.63 | 450  | 2 |

|     |       |    |    |       |    |    |       |    |    |    |      |     |       |    |       |      |   |
|-----|-------|----|----|-------|----|----|-------|----|----|----|------|-----|-------|----|-------|------|---|
| 147 | 16.80 | 75 | 85 | 17.25 | 75 | 75 | 26.63 | 80 | 75 | 80 | 9.00 | 100 | 10.40 | 80 | 80.08 | 780  | 3 |
| 148 | 15.75 | 80 | 70 | 16.10 | 80 | 60 | 26.63 | 80 | 75 | 80 | 9.00 | 100 | 10.40 | 80 | 77.88 | 1150 | 3 |
| 149 | 15.23 | 75 | 70 | 14.95 | 70 | 60 | 27.20 | 85 | 75 | 80 | 9.00 | 100 | 10.40 | 80 | 76.78 | 1250 | 3 |
| 150 | 17.85 | 85 | 85 | 17.83 | 75 | 80 | 26.63 | 80 | 75 | 80 | 9.00 | 100 | 10.40 | 80 | 81.71 | 1850 | 3 |
| 151 | 16.80 | 80 | 80 | 16.10 | 60 | 80 | 27.20 | 85 | 75 | 80 | 9.00 | 100 | 10.40 | 80 | 79.50 | 2100 | 3 |
| 152 | 17.33 | 85 | 80 | 16.68 | 60 | 85 | 26.63 | 80 | 75 | 80 | 9.00 | 100 | 9.75  | 75 | 79.38 | 2250 | 3 |
| 153 | 12.60 | 65 | 55 | 15.53 | 70 | 65 | 14.17 | 65 | 0  | 60 | 0.00 | 0   | 7.15  | 55 | 49.44 | 50   | 1 |
| 154 | 14.18 | 60 | 75 | 15.53 | 70 | 65 | 12.47 | 65 | 0  | 45 | 0.00 | 0   | 9.10  | 70 | 51.27 | 55   | 1 |
| 155 | 14.18 | 70 | 65 | 14.95 | 65 | 65 | 22.67 | 60 | 75 | 65 | 0.00 | 0   | 8.45  | 65 | 60.24 | 65   | 2 |
| 156 | 12.60 | 60 | 60 | 16.10 | 65 | 75 | 15.30 | 70 | 0  | 65 | 0.00 | 0   | 8.45  | 65 | 52.45 | 78   | 1 |
| 157 | 12.08 | 50 | 65 | 15.53 | 70 | 65 | 14.73 | 65 | 0  | 65 | 2.25 | 25  | 7.80  | 60 | 52.38 | 120  | 1 |
| 158 | 10.50 | 45 | 55 | 14.95 | 65 | 65 | 14.73 | 65 | 0  | 65 | 2.25 | 25  | 8.45  | 65 | 50.88 | 125  | 1 |
| 159 | 12.08 | 70 | 45 | 15.53 | 70 | 65 | 13.03 | 65 | 0  | 50 | 2.25 | 25  | 8.45  | 65 | 51.33 | 135  | 1 |
| 160 | 13.65 | 75 | 55 | 14.38 | 60 | 65 | 11.33 | 65 | 0  | 35 | 2.25 | 25  | 7.80  | 60 | 49.41 | 140  | 1 |
| 161 | 13.13 | 60 | 65 | 14.95 | 65 | 65 | 10.77 | 65 | 0  | 30 | 2.25 | 25  | 8.45  | 65 | 49.54 | 160  | 1 |
| 162 | 14.70 | 75 | 65 | 15.53 | 70 | 65 | 22.67 | 65 | 75 | 60 | 4.50 | 50  | 7.80  | 60 | 65.19 | 290  | 2 |
| 163 | 13.65 | 65 | 65 | 13.23 | 50 | 65 | 26.63 | 85 | 75 | 75 | 4.50 | 50  | 9.75  | 75 | 67.76 | 1300 | 2 |
| 164 | 14.70 | 75 | 65 | 12.65 | 45 | 65 | 23.80 | 85 | 50 | 75 | 4.50 | 50  | 9.75  | 75 | 65.40 | 1450 | 2 |
| 165 | 14.70 | 75 | 65 | 12.08 | 40 | 65 | 23.80 | 85 | 50 | 75 | 4.50 | 50  | 9.75  | 75 | 64.83 | 1480 | 2 |
| 166 | 16.80 | 80 | 80 | 16.68 | 70 | 75 | 26.63 | 80 | 75 | 80 | 9.00 | 100 | 9.75  | 75 | 78.86 | 1520 | 3 |
| 167 | 14.70 | 75 | 65 | 16.68 | 70 | 75 | 27.20 | 85 | 75 | 80 | 6.75 | 75  | 9.75  | 75 | 75.08 | 1680 | 3 |
| 168 | 16.80 | 75 | 85 | 15.53 | 60 | 75 | 27.77 | 90 | 75 | 80 | 9.00 | 100 | 9.75  | 75 | 78.84 | 2200 | 3 |
| 169 | 12.08 | 60 | 55 | 17.83 | 75 | 80 | 13.60 | 70 | 0  | 50 | 0.00 | 0   | 7.80  | 60 | 51.30 | 32   | 1 |
| 170 | 15.23 | 70 | 75 | 13.80 | 55 | 65 | 22.67 | 75 | 75 | 50 | 0.00 | 0   | 8.45  | 65 | 60.14 | 40   | 2 |
| 171 | 12.08 | 55 | 60 | 17.83 | 75 | 80 | 14.73 | 65 | 0  | 65 | 0.00 | 0   | 8.45  | 65 | 53.08 | 45   | 1 |

|     |       |    |    |       |    |    |       |    |    |    |      |     |       |    |       |      |   |
|-----|-------|----|----|-------|----|----|-------|----|----|----|------|-----|-------|----|-------|------|---|
| 172 | 13.65 | 60 | 70 | 17.83 | 75 | 80 | 14.17 | 65 | 0  | 60 | 0.00 | 0   | 8.45  | 65 | 54.09 | 51   | 1 |
| 173 | 12.08 | 50 | 65 | 17.25 | 70 | 80 | 14.17 | 65 | 0  | 60 | 0.00 | 0   | 7.80  | 60 | 51.29 | 55   | 1 |
| 174 | 11.55 | 50 | 60 | 17.83 | 75 | 80 | 15.30 | 65 | 0  | 70 | 0.00 | 0   | 9.10  | 70 | 53.78 | 72   | 1 |
| 175 | 13.13 | 65 | 60 | 14.95 | 65 | 65 | 21.53 | 75 | 50 | 65 | 2.25 | 25  | 8.45  | 65 | 60.31 | 85   | 2 |
| 176 | 14.18 | 65 | 70 | 15.53 | 70 | 65 | 13.60 | 65 | 0  | 55 | 2.25 | 25  | 9.10  | 70 | 54.65 | 253  | 1 |
| 177 | 12.60 | 65 | 55 | 13.23 | 50 | 65 | 24.37 | 85 | 75 | 55 | 4.50 | 50  | 9.75  | 75 | 64.44 | 327  | 2 |
| 178 | 15.75 | 65 | 85 | 15.53 | 70 | 65 | 24.37 | 85 | 75 | 55 | 4.50 | 50  | 9.10  | 70 | 69.24 | 336  | 2 |
| 179 | 14.18 | 75 | 60 | 14.38 | 60 | 65 | 24.37 | 80 | 75 | 60 | 4.50 | 50  | 9.10  | 70 | 66.52 | 345  | 2 |
| 180 | 16.80 | 85 | 75 | 14.95 | 65 | 65 | 24.37 | 80 | 75 | 60 | 4.50 | 50  | 9.10  | 70 | 69.72 | 405  | 2 |
| 181 | 15.23 | 70 | 75 | 13.80 | 55 | 65 | 19.27 | 85 | 25 | 60 | 4.50 | 50  | 9.10  | 70 | 61.89 | 425  | 2 |
| 182 | 13.13 | 60 | 65 | 13.80 | 55 | 65 | 26.07 | 85 | 75 | 70 | 4.50 | 50  | 9.10  | 70 | 66.59 | 580  | 2 |
| 183 | 16.80 | 80 | 80 | 16.68 | 70 | 75 | 24.93 | 70 | 75 | 75 | 9.00 | 100 | 9.75  | 75 | 77.16 | 610  | 3 |
| 184 | 12.08 | 55 | 60 | 14.38 | 60 | 65 | 22.10 | 75 | 50 | 70 | 4.50 | 50  | 9.10  | 70 | 62.15 | 735  | 2 |
| 185 | 12.60 | 65 | 55 | 13.23 | 50 | 65 | 23.80 | 85 | 50 | 75 | 4.50 | 50  | 9.10  | 70 | 63.23 | 780  | 2 |
| 186 | 17.33 | 80 | 85 | 18.98 | 80 | 85 | 29.47 | 90 | 80 | 90 | 9.00 | 100 | 11.05 | 85 | 85.82 | 3500 | 4 |
| 187 | 15.23 | 70 | 75 | 17.25 | 80 | 70 | 14.17 | 65 | 0  | 60 | 0.00 | 0   | 7.80  | 60 | 54.44 | 38   | 1 |
| 188 | 16.28 | 80 | 75 | 13.80 | 55 | 65 | 18.70 | 85 | 25 | 55 | 2.25 | 25  | 9.10  | 70 | 60.13 | 40   | 2 |
| 189 | 10.50 | 45 | 55 | 16.68 | 80 | 65 | 15.30 | 70 | 0  | 65 | 0.00 | 0   | 9.10  | 70 | 51.58 | 45   | 1 |
| 190 | 14.70 | 65 | 75 | 13.80 | 55 | 65 | 24.37 | 85 | 75 | 55 | 0.00 | 0   | 8.45  | 65 | 61.32 | 56   | 2 |
| 191 | 9.45  | 45 | 45 | 16.10 | 70 | 70 | 12.47 | 65 | 0  | 45 | 0.00 | 0   | 8.45  | 65 | 46.47 | 62   | 1 |
| 192 | 11.55 | 50 | 60 | 17.25 | 80 | 70 | 11.90 | 70 | 0  | 35 | 0.00 | 0   | 7.15  | 55 | 47.85 | 68   | 1 |
| 193 | 13.13 | 60 | 65 | 15.53 | 65 | 70 | 10.77 | 65 | 0  | 30 | 0.00 | 0   | 8.45  | 65 | 47.87 | 74   | 1 |
| 194 | 14.70 | 65 | 75 | 14.38 | 60 | 65 | 22.10 | 65 | 75 | 55 | 0.00 | 0   | 9.10  | 70 | 60.28 | 81   | 2 |
| 195 | 13.65 | 70 | 60 | 17.25 | 75 | 75 | 13.60 | 65 | 0  | 55 | 0.00 | 0   | 7.80  | 60 | 52.30 | 85   | 1 |
| 196 | 11.03 | 45 | 60 | 14.38 | 60 | 65 | 18.70 | 75 | 25 | 65 | 2.25 | 25  | 8.45  | 65 | 54.80 | 355  | 1 |



|     |       |    |    |       |    |    |       |    |    |    |      |     |       |    |       |      |   |
|-----|-------|----|----|-------|----|----|-------|----|----|----|------|-----|-------|----|-------|------|---|
| 197 | 16.80 | 85 | 75 | 14.38 | 60 | 65 | 24.93 | 85 | 75 | 60 | 4.50 | 50  | 9.75  | 75 | 70.36 | 450  | 2 |
| 198 | 16.28 | 80 | 75 | 13.80 | 55 | 65 | 25.50 | 85 | 75 | 65 | 4.50 | 50  | 9.75  | 75 | 69.83 | 460  | 2 |
| 199 | 13.65 | 65 | 65 | 15.53 | 70 | 65 | 22.67 | 85 | 50 | 65 | 4.50 | 50  | 9.75  | 75 | 66.09 | 556  | 2 |
| 200 | 13.65 | 50 | 80 | 16.10 | 75 | 65 | 25.50 | 80 | 75 | 70 | 4.50 | 50  | 9.75  | 75 | 69.50 | 580  | 2 |
| 201 | 13.13 | 60 | 65 | 13.80 | 55 | 65 | 23.23 | 85 | 50 | 70 | 4.50 | 50  | 9.75  | 75 | 64.41 | 665  | 2 |
| 202 | 13.65 | 65 | 65 | 14.38 | 60 | 65 | 24.37 | 75 | 75 | 65 | 4.50 | 50  | 9.75  | 75 | 66.64 | 775  | 2 |
| 203 | 16.28 | 75 | 80 | 12.65 | 45 | 65 | 25.50 | 85 | 75 | 65 | 4.50 | 50  | 9.75  | 75 | 68.68 | 880  | 2 |
| 204 | 16.80 | 85 | 75 | 12.65 | 45 | 65 | 27.77 | 85 | 75 | 85 | 6.75 | 75  | 10.40 | 80 | 74.37 | 3100 | 2 |
| 205 | 12.08 | 55 | 60 | 17.25 | 80 | 70 | 12.47 | 65 | 0  | 45 | 0.00 | 0   | 9.10  | 70 | 50.89 | 41   | 1 |
| 206 | 12.08 | 60 | 55 | 16.10 | 70 | 70 | 13.60 | 65 | 0  | 55 | 0.00 | 0   | 8.45  | 65 | 50.23 | 45   | 1 |
| 207 | 13.65 | 60 | 70 | 15.53 | 65 | 70 | 14.17 | 70 | 0  | 55 | 0.00 | 0   | 7.80  | 60 | 51.14 | 58   | 1 |
| 208 | 14.18 | 65 | 70 | 17.25 | 80 | 70 | 12.47 | 65 | 0  | 45 | 0.00 | 0   | 8.45  | 65 | 52.34 | 65   | 1 |
| 209 | 12.60 | 55 | 65 | 14.95 | 60 | 70 | 12.47 | 65 | 0  | 45 | 0.00 | 0   | 7.80  | 60 | 47.82 | 80   | 1 |
| 210 | 13.13 | 70 | 55 | 14.38 | 55 | 70 | 14.17 | 65 | 0  | 60 | 0.00 | 0   | 7.80  | 60 | 49.47 | 81   | 1 |
| 211 | 15.23 | 80 | 65 | 13.80 | 55 | 65 | 23.80 | 85 | 75 | 50 | 0.00 | 0   | 9.10  | 70 | 61.93 | 85   | 2 |
| 212 | 15.75 | 75 | 75 | 14.95 | 65 | 65 | 23.80 | 85 | 75 | 50 | 0.00 | 0   | 9.10  | 70 | 63.60 | 88   | 2 |
| 213 | 15.75 | 65 | 85 | 14.38 | 60 | 65 | 21.53 | 85 | 50 | 55 | 2.25 | 25  | 9.75  | 75 | 63.66 | 224  | 2 |
| 214 | 11.55 | 65 | 45 | 13.23 | 50 | 65 | 14.73 | 65 | 0  | 65 | 2.25 | 25  | 8.45  | 65 | 50.21 | 268  | 1 |
| 215 | 13.65 | 65 | 65 | 14.38 | 60 | 65 | 19.83 | 65 | 50 | 60 | 4.50 | 50  | 9.75  | 75 | 62.11 | 385  | 2 |
| 216 | 11.03 | 55 | 50 | 13.80 | 55 | 65 | 21.53 | 75 | 50 | 65 | 4.50 | 50  | 9.75  | 75 | 60.61 | 412  | 2 |
| 217 | 13.65 | 75 | 55 | 13.80 | 55 | 65 | 22.67 | 85 | 50 | 65 | 4.50 | 50  | 9.75  | 75 | 64.37 | 533  | 2 |
| 218 | 16.28 | 80 | 75 | 15.53 | 70 | 65 | 22.67 | 80 | 50 | 70 | 4.50 | 50  | 9.75  | 75 | 68.72 | 628  | 2 |
| 219 | 12.08 | 70 | 45 | 14.95 | 65 | 65 | 23.23 | 85 | 50 | 70 | 4.50 | 50  | 9.75  | 75 | 64.51 | 780  | 2 |
| 220 | 17.85 | 80 | 90 | 15.53 | 70 | 65 | 25.50 | 70 | 75 | 80 | 9.00 | 100 | 9.75  | 75 | 77.63 | 820  | 3 |
| 221 | 16.80 | 85 | 75 | 17.25 | 75 | 75 | 26.63 | 90 | 75 | 70 | 9.00 | 100 | 9.75  | 75 | 79.43 | 1900 | 3 |

|     |       |    |    |       |    |    |       |    |    |    |      |    |      |    |       |      |   |
|-----|-------|----|----|-------|----|----|-------|----|----|----|------|----|------|----|-------|------|---|
| 222 | 13.13 | 70 | 55 | 17.25 | 75 | 75 | 14.73 | 65 | 0  | 65 | 0.00 | 0  | 8.45 | 65 | 53.56 | 36   | 1 |
| 223 | 13.65 | 65 | 65 | 16.68 | 70 | 75 | 13.60 | 65 | 0  | 55 | 0.00 | 0  | 7.80 | 60 | 51.73 | 40   | 1 |
| 224 | 11.55 | 35 | 75 | 17.25 | 75 | 75 | 14.17 | 65 | 0  | 60 | 0.00 | 0  | 7.80 | 60 | 50.77 | 45   | 1 |
| 225 | 13.13 | 55 | 70 | 15.53 | 60 | 75 | 12.47 | 65 | 0  | 45 | 0.00 | 0  | 7.15 | 55 | 48.27 | 58   | 1 |
| 226 | 15.23 | 80 | 65 | 14.95 | 65 | 65 | 23.80 | 80 | 75 | 55 | 4.50 | 50 | 8.45 | 65 | 66.93 | 62   | 2 |
| 227 | 13.13 | 60 | 65 | 17.25 | 75 | 75 | 13.60 | 65 | 0  | 55 | 0.00 | 0  | 7.15 | 55 | 51.13 | 70   | 1 |
| 228 | 13.13 | 65 | 60 | 17.25 | 75 | 75 | 11.90 | 65 | 0  | 40 | 0.00 | 0  | 8.45 | 65 | 50.73 | 80   | 1 |
| 229 | 13.13 | 70 | 55 | 14.38 | 55 | 70 | 13.60 | 65 | 0  | 55 | 2.25 | 25 | 7.80 | 60 | 51.15 | 280  | 1 |
| 230 | 15.23 | 65 | 80 | 14.38 | 60 | 65 | 25.50 | 85 | 75 | 65 | 4.50 | 50 | 9.75 | 75 | 69.35 | 402  | 2 |
| 231 | 16.80 | 80 | 80 | 13.80 | 55 | 65 | 24.37 | 70 | 75 | 70 | 4.50 | 50 | 9.75 | 75 | 69.22 | 460  | 2 |
| 232 | 11.55 | 55 | 55 | 13.80 | 55 | 65 | 20.97 | 70 | 50 | 65 | 4.50 | 50 | 9.75 | 75 | 60.57 | 520  | 2 |
| 233 | 15.23 | 65 | 80 | 13.80 | 55 | 65 | 20.40 | 85 | 25 | 70 | 4.50 | 50 | 9.75 | 75 | 63.68 | 550  | 2 |
| 234 | 14.18 | 80 | 55 | 14.38 | 60 | 65 | 20.40 | 85 | 25 | 70 | 4.50 | 50 | 9.75 | 75 | 63.20 | 630  | 2 |
| 235 | 15.23 | 80 | 65 | 13.80 | 55 | 65 | 18.13 | 65 | 25 | 70 | 4.50 | 50 | 9.75 | 75 | 61.41 | 720  | 2 |
| 236 | 15.75 | 75 | 75 | 13.23 | 50 | 65 | 26.07 | 85 | 75 | 70 | 4.50 | 50 | 9.75 | 75 | 69.29 | 820  | 2 |
| 237 | 15.75 | 80 | 70 | 13.23 | 50 | 65 | 23.80 | 65 | 75 | 70 | 4.50 | 50 | 9.75 | 75 | 67.03 | 840  | 2 |
| 238 | 17.85 | 85 | 85 | 17.25 | 75 | 75 | 24.93 | 80 | 75 | 65 | 6.75 | 75 | 9.10 | 70 | 75.88 | 1850 | 3 |
| 239 | 11.55 | 65 | 45 | 17.25 | 75 | 75 | 14.73 | 65 | 0  | 65 | 0.00 | 0  | 8.45 | 65 | 51.98 | 36   | 1 |
| 240 | 14.18 | 65 | 70 | 17.25 | 75 | 75 | 14.73 | 65 | 0  | 65 | 0.00 | 0  | 8.45 | 65 | 54.61 | 41   | 1 |
| 241 | 14.18 | 60 | 75 | 15.53 | 60 | 75 | 13.60 | 65 | 0  | 55 | 0.00 | 0  | 8.45 | 65 | 51.75 | 48   | 1 |
| 242 | 12.60 | 60 | 60 | 16.10 | 65 | 75 | 15.30 | 65 | 0  | 70 | 0.00 | 0  | 7.80 | 60 | 51.80 | 53   | 1 |
| 243 | 11.55 | 55 | 55 | 16.10 | 65 | 75 | 14.17 | 65 | 0  | 60 | 0.00 | 0  | 7.80 | 60 | 49.62 | 62   | 1 |
| 244 | 12.60 | 65 | 55 | 17.25 | 75 | 75 | 13.60 | 65 | 0  | 55 | 0.00 | 0  | 7.80 | 60 | 51.25 | 73   | 1 |
| 245 | 12.60 | 60 | 60 | 15.53 | 60 | 75 | 13.60 | 65 | 0  | 55 | 0.00 | 0  | 9.10 | 70 | 50.83 | 85   | 1 |
| 246 | 10.50 | 55 | 45 | 15.53 | 65 | 70 | 14.17 | 65 | 0  | 60 | 0.00 | 0  | 8.45 | 65 | 48.64 | 87   | 1 |

|     |       |    |    |       |    |    |       |     |    |     |      |     |       |    |       |       |   |
|-----|-------|----|----|-------|----|----|-------|-----|----|-----|------|-----|-------|----|-------|-------|---|
| 247 | 16.28 | 80 | 75 | 13.80 | 55 | 65 | 21.53 | 60  | 75 | 55  | 0.00 | 0   | 9.10  | 70 | 60.71 | 91    | 2 |
| 248 | 14.70 | 75 | 65 | 14.38 | 60 | 65 | 22.10 | 60  | 75 | 60  | 2.25 | 25  | 9.75  | 75 | 63.18 | 310   | 2 |
| 249 | 16.28 | 75 | 80 | 14.38 | 60 | 65 | 22.67 | 85  | 50 | 65  | 4.50 | 50  | 9.75  | 75 | 67.57 | 435   | 2 |
| 250 | 16.80 | 80 | 80 | 14.95 | 65 | 65 | 22.67 | 85  | 50 | 65  | 4.50 | 50  | 9.75  | 75 | 68.67 | 568   | 2 |
| 251 | 15.23 | 80 | 65 | 14.95 | 65 | 65 | 22.67 | 85  | 50 | 65  | 4.50 | 50  | 9.75  | 75 | 67.09 | 654   | 2 |
| 252 | 16.28 | 70 | 85 | 13.80 | 55 | 65 | 22.67 | 85  | 50 | 65  | 4.50 | 50  | 9.75  | 75 | 66.99 | 708   | 2 |
| 253 | 15.75 | 65 | 85 | 13.23 | 50 | 65 | 24.93 | 80  | 75 | 65  | 4.50 | 50  | 9.75  | 75 | 68.16 | 788   | 2 |
| 254 | 17.33 | 80 | 85 | 16.68 | 70 | 75 | 24.93 | 65  | 75 | 80  | 9.00 | 100 | 9.10  | 70 | 77.03 | 872   | 3 |
| 255 | 18.38 | 85 | 90 | 18.40 | 75 | 85 | 28.90 | 85  | 80 | 90  | 9.00 | 100 | 11.05 | 85 | 85.73 | 4150  | 4 |
| 256 | 13.13 | 60 | 65 | 18.40 | 80 | 80 | 13.60 | 60  | 0  | 60  | 0.00 | 0   | 7.80  | 60 | 52.93 | 55    | 1 |
| 257 | 13.13 | 60 | 65 | 18.40 | 80 | 80 | 13.60 | 60  | 0  | 60  | 0.00 | 0   | 9.10  | 70 | 54.23 | 63    | 1 |
| 258 | 14.18 | 65 | 70 | 18.40 | 80 | 80 | 12.47 | 60  | 0  | 50  | 0.00 | 0   | 9.10  | 70 | 54.14 | 102   | 1 |
| 259 | 14.18 | 80 | 55 | 13.80 | 55 | 65 | 23.23 | 70  | 75 | 60  | 4.50 | 50  | 9.75  | 75 | 65.46 | 116   | 2 |
| 260 | 15.23 | 80 | 65 | 16.10 | 75 | 65 | 24.37 | 85  | 75 | 55  | 4.50 | 50  | 9.75  | 75 | 69.94 | 146   | 2 |
| 261 | 14.70 | 65 | 75 | 14.38 | 60 | 65 | 19.27 | 85  | 25 | 60  | 4.50 | 50  | 9.75  | 75 | 62.59 | 187   | 2 |
| 262 | 11.03 | 60 | 45 | 13.80 | 55 | 65 | 22.67 | 85  | 50 | 65  | 4.50 | 50  | 9.75  | 75 | 61.74 | 233   | 2 |
| 263 | 11.03 | 65 | 40 | 14.38 | 60 | 65 | 23.80 | 70  | 75 | 65  | 4.50 | 50  | 9.75  | 75 | 63.45 | 413   | 2 |
| 264 | 12.60 | 65 | 55 | 13.80 | 55 | 65 | 25.50 | 85  | 75 | 65  | 4.50 | 50  | 9.75  | 75 | 66.15 | 685   | 2 |
| 265 | 13.13 | 70 | 55 | 13.23 | 50 | 65 | 20.97 | 70  | 50 | 65  | 4.50 | 50  | 10.40 | 80 | 62.22 | 1032  | 2 |
| 266 | 16.28 | 70 | 85 | 13.23 | 50 | 65 | 24.37 | 70  | 75 | 70  | 4.50 | 50  | 9.10  | 70 | 67.47 | 1148  | 2 |
| 267 | 15.75 | 75 | 75 | 13.23 | 50 | 65 | 26.63 | 85  | 75 | 75  | 4.50 | 50  | 10.40 | 80 | 70.51 | 1241  | 2 |
| 268 | 16.80 | 85 | 75 | 17.25 | 75 | 75 | 26.63 | 85  | 75 | 75  | 6.75 | 75  | 10.40 | 80 | 77.83 | 1289  | 3 |
| 269 | 16.28 | 80 | 75 | 15.53 | 70 | 65 | 26.63 | 80  | 75 | 80  | 6.75 | 75  | 10.40 | 80 | 75.58 | 1350  | 3 |
| 270 | 16.80 | 85 | 75 | 16.68 | 70 | 75 | 26.07 | 80  | 75 | 75  | 6.75 | 75  | 10.40 | 80 | 76.69 | 1475  | 3 |
| 271 | 19.95 | 95 | 95 | 17.25 | 60 | 90 | 33.43 | 100 | 95 | 100 | 9.00 | 100 | 12.35 | 95 | 91.98 | 26000 | 4 |

|     |       |    |    |       |    |    |       |     |    |     |      |     |       |    |       |       |   |
|-----|-------|----|----|-------|----|----|-------|-----|----|-----|------|-----|-------|----|-------|-------|---|
| 272 | 18.90 | 95 | 85 | 16.68 | 60 | 85 | 33.43 | 100 | 95 | 100 | 9.00 | 100 | 12.35 | 95 | 90.36 | 28000 | 4 |
| 273 | 14.18 | 65 | 70 | 18.40 | 80 | 80 | 12.47 | 60  | 0  | 50  | 0.00 | 0   | 7.15  | 55 | 52.19 | 36    | 1 |
| 274 | 12.60 | 60 | 60 | 18.40 | 80 | 80 | 12.47 | 60  | 0  | 50  | 0.00 | 0   | 6.50  | 50 | 49.97 | 40    | 1 |
| 275 | 14.18 | 70 | 65 | 18.40 | 80 | 80 | 13.03 | 60  | 0  | 55  | 0.00 | 0   | 7.80  | 60 | 53.41 | 50    | 1 |
| 276 | 13.65 | 60 | 70 | 18.40 | 80 | 80 | 12.47 | 60  | 0  | 50  | 0.00 | 0   | 7.15  | 55 | 51.67 | 58    | 1 |
| 277 | 15.23 | 75 | 70 | 18.40 | 80 | 80 | 13.03 | 60  | 0  | 55  | 0.00 | 0   | 8.45  | 65 | 55.11 | 63    | 1 |
| 278 | 13.65 | 60 | 70 | 18.40 | 80 | 80 | 12.47 | 60  | 0  | 50  | 0.00 | 0   | 7.15  | 55 | 51.67 | 66    | 1 |
| 279 | 16.80 | 80 | 80 | 13.80 | 55 | 65 | 19.27 | 65  | 50 | 55  | 2.25 | 25  | 8.45  | 65 | 60.57 | 70    | 2 |
| 280 | 12.08 | 60 | 55 | 18.40 | 80 | 80 | 14.73 | 60  | 0  | 70  | 0.00 | 0   | 9.10  | 70 | 54.31 | 75    | 1 |
| 281 | 10.50 | 55 | 45 | 18.40 | 80 | 80 | 14.73 | 60  | 0  | 70  | 0.00 | 0   | 8.45  | 65 | 52.08 | 81    | 1 |
| 282 | 16.80 | 80 | 80 | 14.38 | 60 | 65 | 18.13 | 80  | 25 | 55  | 2.25 | 25  | 9.10  | 70 | 60.66 | 225   | 2 |
| 283 | 16.80 | 80 | 80 | 14.38 | 60 | 65 | 19.27 | 85  | 25 | 60  | 2.25 | 25  | 9.10  | 70 | 61.79 | 260   | 2 |
| 284 | 13.65 | 65 | 65 | 13.80 | 55 | 65 | 20.40 | 85  | 25 | 70  | 4.50 | 50  | 9.10  | 70 | 61.45 | 291   | 2 |
| 285 | 15.23 | 65 | 80 | 14.95 | 65 | 65 | 18.70 | 85  | 25 | 55  | 4.50 | 50  | 9.10  | 70 | 62.48 | 348   | 2 |
| 286 | 14.70 | 75 | 65 | 13.80 | 55 | 65 | 18.13 | 75  | 25 | 60  | 4.50 | 50  | 9.10  | 70 | 60.23 | 365   | 2 |
| 287 | 16.80 | 80 | 80 | 15.53 | 70 | 65 | 22.10 | 85  | 50 | 60  | 4.50 | 50  | 9.10  | 70 | 68.03 | 510   | 2 |
| 288 | 12.08 | 60 | 55 | 13.23 | 50 | 65 | 26.63 | 85  | 75 | 75  | 4.50 | 50  | 9.10  | 70 | 65.53 | 750   | 2 |
| 289 | 17.33 | 80 | 85 | 15.53 | 70 | 65 | 25.50 | 70  | 75 | 80  | 6.75 | 75  | 10.40 | 80 | 75.50 | 920   | 3 |
| 290 | 14.70 | 80 | 60 | 12.65 | 45 | 65 | 26.63 | 85  | 75 | 75  | 4.50 | 50  | 9.75  | 75 | 68.23 | 2650  | 2 |
| 291 | 11.03 | 60 | 45 | 17.83 | 80 | 75 | 12.47 | 60  | 0  | 50  | 0.00 | 0   | 7.15  | 55 | 48.47 | 40    | 1 |
| 292 | 13.13 | 55 | 70 | 18.40 | 80 | 80 | 12.47 | 60  | 0  | 50  | 0.00 | 0   | 5.85  | 45 | 49.84 | 45    | 1 |
| 293 | 14.18 | 70 | 65 | 13.80 | 55 | 65 | 21.53 | 75  | 50 | 65  | 2.25 | 25  | 8.45  | 65 | 60.21 | 55    | 2 |
| 294 | 14.18 | 55 | 80 | 14.38 | 60 | 65 | 20.97 | 50  | 70 | 65  | 2.25 | 25  | 9.10  | 70 | 60.87 | 62    | 2 |
| 295 | 16.28 | 75 | 80 | 13.80 | 55 | 65 | 21.53 | 55  | 75 | 60  | 0.00 | 0   | 8.45  | 65 | 60.06 | 64    | 2 |
| 296 | 15.23 | 75 | 70 | 13.80 | 55 | 65 | 21.53 | 55  | 75 | 60  | 2.25 | 25  | 8.45  | 65 | 61.26 | 70    | 2 |

|     |       |    |    |       |    |    |       |    |    |    |      |    |       |    |       |      |   |
|-----|-------|----|----|-------|----|----|-------|----|----|----|------|----|-------|----|-------|------|---|
| 297 | 13.65 | 60 | 70 | 18.40 | 80 | 80 | 14.17 | 60 | 0  | 65 | 0.00 | 0  | 5.85  | 45 | 52.07 | 80   | 1 |
| 298 | 12.08 | 65 | 50 | 14.38 | 60 | 65 | 14.73 | 65 | 0  | 65 | 2.25 | 25 | 8.45  | 65 | 51.88 | 201  | 1 |
| 299 | 15.23 | 75 | 70 | 14.95 | 65 | 65 | 24.93 | 85 | 75 | 60 | 2.25 | 25 | 9.10  | 70 | 66.46 | 240  | 2 |
| 300 | 14.18 | 70 | 65 | 12.65 | 45 | 65 | 13.60 | 65 | 0  | 55 | 2.25 | 25 | 8.45  | 65 | 51.13 | 300  | 1 |
| 301 | 13.13 | 65 | 60 | 14.95 | 65 | 65 | 23.80 | 75 | 75 | 60 | 4.50 | 50 | 9.10  | 70 | 65.48 | 367  | 2 |
| 302 | 12.08 | 55 | 60 | 14.38 | 60 | 65 | 25.50 | 85 | 75 | 65 | 4.50 | 50 | 9.10  | 70 | 65.55 | 382  | 2 |
| 303 | 14.18 | 85 | 50 | 14.38 | 60 | 65 | 22.67 | 60 | 75 | 65 | 4.50 | 50 | 9.10  | 70 | 64.82 | 478  | 2 |
| 304 | 13.65 | 75 | 55 | 13.80 | 55 | 65 | 25.50 | 85 | 75 | 65 | 4.50 | 50 | 9.10  | 70 | 66.55 | 536  | 2 |
| 305 | 13.65 | 75 | 55 | 15.53 | 70 | 65 | 25.50 | 85 | 75 | 65 | 4.50 | 50 | 9.10  | 70 | 68.28 | 750  | 2 |
| 306 | 16.28 | 75 | 80 | 17.25 | 70 | 80 | 26.63 | 85 | 75 | 75 | 6.75 | 75 | 10.40 | 80 | 77.31 | 1700 | 3 |
| 307 | 17.33 | 80 | 85 | 16.10 | 65 | 75 | 26.63 | 80 | 75 | 80 | 6.75 | 75 | 10.40 | 80 | 77.21 | 1900 | 3 |
| 308 | 16.80 | 75 | 85 | 15.53 | 60 | 75 | 27.77 | 90 | 75 | 80 | 6.75 | 75 | 10.40 | 80 | 77.24 | 2200 | 3 |
| 309 | 15.75 | 75 | 75 | 13.23 | 50 | 65 | 23.23 | 55 | 75 | 75 | 6.75 | 75 | 9.10  | 70 | 68.06 | 2500 | 2 |
| 310 | 13.13 | 55 | 70 | 16.68 | 80 | 65 | 11.90 | 60 | 0  | 45 | 0.00 | 0  | 8.45  | 65 | 50.15 | 52   | 1 |
| 311 | 15.75 | 75 | 75 | 14.95 | 65 | 65 | 18.70 | 60 | 50 | 55 | 2.25 | 25 | 8.45  | 65 | 60.10 | 55   | 2 |
| 312 | 11.55 | 40 | 70 | 16.10 | 75 | 65 | 11.90 | 60 | 0  | 45 | 0.00 | 0  | 9.10  | 70 | 48.65 | 65   | 1 |
| 313 | 13.65 | 65 | 65 | 15.53 | 70 | 65 | 19.83 | 65 | 50 | 60 | 2.25 | 25 | 9.10  | 70 | 60.36 | 70   | 2 |
| 314 | 12.08 | 55 | 60 | 16.68 | 80 | 65 | 13.60 | 60 | 0  | 60 | 0.00 | 0  | 7.15  | 55 | 49.50 | 70   | 1 |
| 315 | 13.65 | 65 | 65 | 16.68 | 80 | 65 | 14.17 | 60 | 0  | 65 | 0.00 | 0  | 6.50  | 50 | 50.99 | 135  | 1 |
| 316 | 14.70 | 70 | 70 | 14.38 | 60 | 65 | 19.83 | 85 | 25 | 65 | 2.25 | 25 | 9.10  | 70 | 60.26 | 240  | 2 |
| 317 | 13.13 | 80 | 45 | 16.10 | 75 | 65 | 24.37 | 85 | 75 | 55 | 4.50 | 50 | 9.10  | 70 | 67.19 | 320  | 2 |
| 318 | 17.33 | 80 | 85 | 15.53 | 70 | 65 | 21.53 | 85 | 50 | 55 | 4.50 | 50 | 9.10  | 70 | 67.98 | 400  | 2 |
| 319 | 13.65 | 65 | 65 | 15.53 | 70 | 65 | 20.40 | 65 | 50 | 65 | 4.50 | 50 | 9.10  | 70 | 63.18 | 450  | 2 |
| 320 | 16.28 | 80 | 75 | 14.38 | 60 | 65 | 25.50 | 85 | 75 | 65 | 4.50 | 50 | 9.10  | 70 | 69.75 | 480  | 2 |
| 321 | 14.18 | 50 | 85 | 13.80 | 55 | 65 | 26.07 | 85 | 75 | 70 | 4.50 | 50 | 9.10  | 70 | 67.64 | 650  | 2 |

|     |       |    |    |       |    |    |       |     |    |    |      |    |      |    |       |      |   |
|-----|-------|----|----|-------|----|----|-------|-----|----|----|------|----|------|----|-------|------|---|
| 322 | 16.80 | 80 | 80 | 17.83 | 80 | 75 | 27.20 | 85  | 75 | 80 | 6.75 | 75 | 9.75 | 75 | 78.33 | 1100 | 3 |
| 323 | 14.18 | 75 | 60 | 13.80 | 50 | 70 | 26.63 | 85  | 75 | 75 | 4.50 | 50 | 9.75 | 75 | 68.86 | 1150 | 2 |
| 324 | 16.28 | 75 | 80 | 16.68 | 70 | 75 | 26.07 | 75  | 75 | 80 | 6.75 | 75 | 9.75 | 75 | 75.52 | 1200 | 3 |
| 325 | 14.70 | 75 | 65 | 12.65 | 45 | 65 | 27.20 | 85  | 75 | 80 | 4.50 | 50 | 9.75 | 75 | 68.80 | 1300 | 2 |
| 326 | 15.23 | 80 | 65 | 16.68 | 65 | 80 | 27.77 | 90  | 75 | 80 | 6.75 | 75 | 9.75 | 75 | 76.17 | 1800 | 3 |
| 327 | 12.60 | 55 | 65 | 16.68 | 80 | 65 | 13.60 | 60  | 0  | 60 | 0.00 | 0  | 8.45 | 65 | 51.33 | 35   | 1 |
| 328 | 13.13 | 55 | 70 | 15.53 | 70 | 65 | 11.90 | 60  | 0  | 45 | 0.00 | 0  | 7.80 | 60 | 48.35 | 37   | 1 |
| 329 | 11.55 | 50 | 60 | 16.68 | 80 | 65 | 14.73 | 60  | 0  | 70 | 0.00 | 0  | 8.45 | 65 | 51.41 | 40   | 1 |
| 330 | 11.03 | 50 | 55 | 16.68 | 80 | 65 | 11.90 | 60  | 0  | 45 | 0.00 | 0  | 8.45 | 65 | 48.05 | 50   | 1 |
| 331 | 15.75 | 70 | 80 | 14.38 | 60 | 65 | 21.53 | 70  | 50 | 70 | 0.00 | 0  | 9.10 | 70 | 60.76 | 55   | 2 |
| 332 | 13.13 | 65 | 60 | 15.53 | 70 | 65 | 13.60 | 65  | 0  | 55 | 0.00 | 0  | 7.15 | 55 | 49.40 | 120  | 1 |
| 333 | 12.60 | 60 | 60 | 14.95 | 65 | 65 | 15.87 | 65  | 0  | 75 | 0.00 | 0  | 7.15 | 55 | 50.57 | 150  | 1 |
| 334 | 11.55 | 65 | 45 | 15.53 | 70 | 65 | 13.60 | 65  | 0  | 55 | 2.25 | 25 | 6.50 | 50 | 49.43 | 180  | 1 |
| 335 | 13.65 | 65 | 65 | 15.53 | 70 | 65 | 14.17 | 65  | 0  | 60 | 2.25 | 25 | 7.80 | 60 | 53.39 | 220  | 1 |
| 336 | 15.75 | 70 | 80 | 15.53 | 70 | 65 | 17.00 | 75  | 25 | 50 | 2.25 | 25 | 9.75 | 75 | 60.28 | 260  | 2 |
| 337 | 15.75 | 70 | 80 | 14.38 | 60 | 65 | 20.97 | 85  | 50 | 50 | 4.50 | 50 | 9.75 | 75 | 65.34 | 350  | 2 |
| 338 | 16.28 | 80 | 75 | 14.95 | 60 | 70 | 22.67 | 85  | 50 | 65 | 4.50 | 50 | 9.75 | 75 | 68.14 | 400  | 2 |
| 339 | 16.28 | 80 | 75 | 14.95 | 65 | 65 | 23.23 | 85  | 50 | 70 | 4.50 | 50 | 9.75 | 75 | 68.71 | 500  | 2 |
| 340 | 15.75 | 65 | 85 | 14.38 | 60 | 65 | 21.53 | 70  | 50 | 70 | 4.50 | 50 | 9.75 | 75 | 65.91 | 550  | 2 |
| 341 | 14.70 | 80 | 60 | 14.38 | 60 | 65 | 21.53 | 70  | 50 | 70 | 4.50 | 50 | 9.75 | 75 | 64.86 | 700  | 2 |
| 342 | 13.65 | 65 | 65 | 13.80 | 55 | 65 | 22.10 | 70  | 50 | 75 | 4.50 | 50 | 9.75 | 75 | 63.80 | 730  | 2 |
| 343 | 14.18 | 65 | 70 | 16.68 | 70 | 75 | 27.77 | 85  | 75 | 85 | 6.75 | 75 | 9.75 | 75 | 75.12 | 1250 | 3 |
| 344 | 13.13 | 60 | 65 | 15.53 | 75 | 60 | 14.17 | 65  | 0  | 60 | 0.00 | 0  | 8.45 | 65 | 51.27 | 35   | 1 |
| 345 | 14.18 | 70 | 65 | 15.53 | 75 | 60 | 13.03 | 65  | 0  | 50 | 0.00 | 0  | 7.80 | 60 | 50.53 | 50   | 1 |
| 346 | 12.60 | 55 | 65 | 14.95 | 65 | 65 | 23.80 | 100 | 50 | 60 | 0.00 | 0  | 9.10 | 70 | 60.45 | 52   | 2 |

|     |       |    |    |       |    |    |       |     |    |     |      |     |       |    |       |       |   |
|-----|-------|----|----|-------|----|----|-------|-----|----|-----|------|-----|-------|----|-------|-------|---|
| 347 | 14.18 | 50 | 85 | 15.53 | 70 | 65 | 22.10 | 85  | 50 | 60  | 2.25 | 25  | 9.10  | 70 | 63.15 | 150   | 2 |
| 348 | 14.18 | 70 | 65 | 12.65 | 45 | 65 | 22.10 | 85  | 50 | 60  | 2.25 | 25  | 9.10  | 70 | 60.28 | 180   | 2 |
| 349 | 14.18 | 75 | 60 | 13.80 | 55 | 65 | 22.67 | 65  | 75 | 60  | 2.25 | 25  | 9.10  | 70 | 61.99 | 210   | 2 |
| 350 | 12.60 | 65 | 55 | 14.38 | 60 | 65 | 22.67 | 65  | 75 | 60  | 2.25 | 25  | 9.10  | 70 | 60.99 | 240   | 2 |
| 351 | 16.28 | 80 | 75 | 13.80 | 55 | 65 | 19.27 | 85  | 25 | 60  | 2.25 | 25  | 9.10  | 70 | 60.69 | 280   | 2 |
| 352 | 15.75 | 80 | 70 | 14.38 | 60 | 65 | 19.27 | 85  | 25 | 60  | 2.25 | 25  | 9.10  | 70 | 60.74 | 350   | 2 |
| 353 | 15.75 | 85 | 65 | 14.38 | 60 | 65 | 19.27 | 85  | 25 | 60  | 2.25 | 25  | 9.10  | 70 | 60.74 | 380   | 2 |
| 354 | 13.13 | 80 | 45 | 13.80 | 55 | 65 | 20.40 | 60  | 50 | 70  | 4.50 | 50  | 9.10  | 70 | 60.93 | 450   | 2 |
| 355 | 13.65 | 80 | 50 | 13.80 | 55 | 65 | 26.07 | 85  | 75 | 70  | 4.50 | 50  | 9.10  | 70 | 67.12 | 530   | 2 |
| 356 | 13.65 | 70 | 60 | 13.23 | 50 | 65 | 26.07 | 85  | 75 | 70  | 4.50 | 50  | 9.10  | 70 | 66.54 | 760   | 2 |
| 357 | 17.33 | 80 | 85 | 13.23 | 50 | 65 | 22.67 | 50  | 75 | 75  | 4.50 | 50  | 9.75  | 75 | 67.47 | 1180  | 2 |
| 358 | 16.28 | 80 | 75 | 16.68 | 70 | 75 | 26.07 | 75  | 75 | 80  | 6.75 | 75  | 9.75  | 75 | 75.52 | 1200  | 3 |
| 359 | 19.43 | 95 | 90 | 14.95 | 55 | 75 | 33.43 | 100 | 95 | 100 | 9.00 | 100 | 12.35 | 95 | 89.16 | 22000 | 4 |
| 360 | 12.08 | 60 | 55 | 14.95 | 70 | 60 | 13.03 | 60  | 0  | 55  | 0.00 | 0   | 7.15  | 55 | 47.21 | 38    | 1 |
| 361 | 13.65 | 75 | 55 | 14.95 | 70 | 60 | 14.17 | 65  | 0  | 60  | 0.00 | 0   | 5.85  | 45 | 48.62 | 40    | 1 |
| 362 | 11.55 | 55 | 55 | 15.53 | 75 | 60 | 14.17 | 65  | 0  | 60  | 0.00 | 0   | 7.15  | 55 | 48.39 | 45    | 1 |
| 363 | 13.13 | 60 | 65 | 14.95 | 70 | 60 | 14.17 | 60  | 0  | 65  | 0.00 | 0   | 7.15  | 55 | 49.39 | 50    | 1 |
| 364 | 14.18 | 60 | 75 | 15.53 | 75 | 60 | 14.73 | 70  | 0  | 60  | 0.00 | 0   | 7.80  | 60 | 52.23 | 56    | 1 |
| 365 | 13.13 | 60 | 65 | 16.10 | 80 | 60 | 15.30 | 65  | 0  | 70  | 0.00 | 0   | 9.10  | 70 | 53.63 | 62    | 1 |
| 366 | 12.08 | 45 | 70 | 15.53 | 75 | 60 | 13.60 | 65  | 0  | 55  | 0.00 | 0   | 8.45  | 65 | 49.65 | 75    | 1 |
| 367 | 16.80 | 80 | 80 | 15.53 | 70 | 65 | 18.70 | 75  | 25 | 65  | 0.00 | 0   | 9.10  | 70 | 60.13 | 81    | 2 |
| 368 | 12.60 | 60 | 60 | 15.53 | 75 | 60 | 15.30 | 75  | 0  | 60  | 2.25 | 25  | 8.45  | 65 | 54.13 | 86    | 1 |
| 369 | 16.80 | 80 | 80 | 14.38 | 60 | 65 | 22.10 | 85  | 50 | 60  | 4.50 | 50  | 9.75  | 75 | 67.53 | 432   | 2 |
| 370 | 15.75 | 65 | 85 | 13.80 | 55 | 65 | 22.67 | 85  | 50 | 65  | 4.50 | 50  | 9.75  | 75 | 66.47 | 540   | 2 |
| 371 | 15.23 | 65 | 80 | 13.80 | 55 | 65 | 25.50 | 85  | 75 | 65  | 4.50 | 50  | 9.75  | 75 | 68.78 | 650   | 2 |

|     |       |    |    |       |    |    |       |    |    |    |      |     |       |    |       |      |   |
|-----|-------|----|----|-------|----|----|-------|----|----|----|------|-----|-------|----|-------|------|---|
| 372 | 13.65 | 65 | 65 | 12.65 | 45 | 65 | 25.50 | 85 | 75 | 65 | 4.50 | 50  | 9.75  | 75 | 66.05 | 780  | 2 |
| 373 | 17.33 | 80 | 85 | 13.23 | 50 | 65 | 26.07 | 85 | 75 | 70 | 4.50 | 50  | 9.75  | 75 | 70.87 | 850  | 2 |
| 374 | 16.80 | 75 | 85 | 16.68 | 55 | 90 | 27.77 | 90 | 75 | 80 | 9.00 | 100 | 11.05 | 85 | 81.29 | 4600 | 3 |
| 375 | 13.13 | 65 | 60 | 15.53 | 75 | 60 | 12.47 | 65 | 0  | 45 | 0.00 | 0   | 7.80  | 60 | 48.92 | 32   | 1 |
| 376 | 13.65 | 65 | 65 | 16.68 | 85 | 60 | 11.90 | 65 | 0  | 40 | 0.00 | 0   | 6.50  | 50 | 48.73 | 38   | 1 |
| 377 | 16.80 | 80 | 80 | 14.38 | 60 | 65 | 20.97 | 85 | 50 | 50 | 0.00 | 0   | 9.10  | 70 | 61.24 | 42   | 2 |
| 378 | 11.03 | 60 | 45 | 15.53 | 75 | 60 | 13.60 | 65 | 0  | 55 | 0.00 | 0   | 5.85  | 45 | 46.00 | 49   | 1 |
| 379 | 11.55 | 55 | 55 | 15.53 | 75 | 60 | 14.17 | 65 | 0  | 60 | 0.00 | 0   | 7.80  | 60 | 49.04 | 52   | 1 |
| 380 | 13.13 | 70 | 55 | 15.53 | 70 | 65 | 23.23 | 85 | 50 | 70 | 0.00 | 0   | 8.45  | 65 | 60.33 | 60   | 2 |
| 381 | 14.70 | 60 | 80 | 13.80 | 55 | 65 | 23.23 | 85 | 50 | 70 | 0.00 | 0   | 8.45  | 65 | 60.18 | 65   | 2 |
| 382 | 13.13 | 60 | 65 | 13.80 | 60 | 60 | 14.73 | 65 | 0  | 65 | 0.00 | 0   | 8.45  | 65 | 50.11 | 73   | 1 |
| 383 | 16.80 | 80 | 80 | 14.95 | 65 | 65 | 20.97 | 85 | 50 | 50 | 0.00 | 0   | 9.10  | 70 | 61.82 | 80   | 2 |
| 384 | 14.18 | 65 | 70 | 16.10 | 65 | 75 | 15.87 | 65 | 25 | 50 | 4.50 | 50  | 7.80  | 60 | 58.44 | 145  | 1 |
| 385 | 14.18 | 80 | 55 | 14.95 | 65 | 65 | 21.53 | 85 | 50 | 55 | 2.25 | 25  | 9.10  | 70 | 62.01 | 285  | 2 |
| 386 | 13.13 | 80 | 45 | 13.80 | 55 | 65 | 24.93 | 85 | 75 | 60 | 4.50 | 50  | 9.75  | 75 | 66.11 | 560  | 2 |
| 387 | 14.18 | 70 | 65 | 13.80 | 55 | 65 | 25.50 | 85 | 75 | 65 | 2.25 | 25  | 9.75  | 75 | 65.48 | 650  | 2 |
| 388 | 14.70 | 75 | 65 | 14.38 | 60 | 65 | 25.50 | 85 | 75 | 65 | 4.50 | 50  | 9.75  | 75 | 68.83 | 750  | 2 |
| 389 | 16.80 | 80 | 80 | 12.65 | 45 | 65 | 25.50 | 85 | 75 | 65 | 4.50 | 50  | 9.75  | 75 | 69.20 | 835  | 2 |
| 390 | 17.33 | 80 | 85 | 16.68 | 60 | 85 | 27.77 | 90 | 75 | 80 | 6.75 | 75  | 9.75  | 75 | 78.27 | 2700 | 3 |
| 391 | 12.08 | 65 | 50 | 16.68 | 80 | 65 | 14.17 | 60 | 0  | 65 | 0.00 | 0   | 8.45  | 65 | 51.37 | 40   | 1 |
| 392 | 17.33 | 85 | 80 | 16.10 | 75 | 65 | 16.43 | 65 | 25 | 55 | 2.25 | 25  | 8.45  | 65 | 60.56 | 45   | 2 |
| 393 | 14.70 | 70 | 70 | 16.68 | 80 | 65 | 11.90 | 60 | 0  | 45 | 0.00 | 0   | 8.45  | 65 | 51.73 | 47   | 1 |
| 394 | 10.50 | 45 | 55 | 16.68 | 80 | 65 | 13.03 | 60 | 0  | 55 | 0.00 | 0   | 8.45  | 65 | 48.66 | 52   | 1 |
| 395 | 16.28 | 75 | 80 | 14.95 | 65 | 65 | 18.13 | 75 | 25 | 60 | 2.25 | 25  | 8.45  | 65 | 60.06 | 62   | 2 |
| 396 | 16.80 | 80 | 80 | 15.53 | 70 | 65 | 16.43 | 55 | 25 | 65 | 2.25 | 25  | 9.10  | 70 | 60.11 | 67   | 2 |



|     |       |    |    |       |    |    |       |    |     |    |      |    |       |    |       |      |   |
|-----|-------|----|----|-------|----|----|-------|----|-----|----|------|----|-------|----|-------|------|---|
| 397 | 17.33 | 85 | 80 | 15.53 | 70 | 65 | 17.00 | 65 | 25  | 60 | 2.25 | 25 | 9.10  | 70 | 61.20 | 75   | 2 |
| 398 | 16.80 | 80 | 80 | 16.10 | 75 | 65 | 15.87 | 60 | 25  | 55 | 2.25 | 25 | 9.10  | 70 | 60.12 | 79   | 2 |
| 399 | 13.13 | 60 | 65 | 17.25 | 75 | 75 | 16.43 | 65 | 25  | 55 | 2.25 | 25 | 7.80  | 60 | 56.86 | 160  | 1 |
| 400 | 13.65 | 65 | 65 | 13.80 | 55 | 65 | 22.10 | 85 | 50  | 60 | 2.25 | 25 | 9.10  | 70 | 60.90 | 220  | 2 |
| 401 | 17.33 | 80 | 85 | 14.38 | 60 | 65 | 22.67 | 85 | 50  | 65 | 4.50 | 50 | 9.75  | 75 | 68.62 | 400  | 2 |
| 402 | 16.28 | 70 | 85 | 15.53 | 65 | 70 | 23.23 | 85 | 50  | 70 | 4.50 | 50 | 9.75  | 75 | 69.28 | 550  | 2 |
| 403 | 13.65 | 50 | 80 | 13.80 | 55 | 65 | 26.07 | 85 | 75  | 70 | 4.50 | 50 | 9.75  | 75 | 67.77 | 630  | 2 |
| 404 | 15.23 | 80 | 65 | 14.95 | 60 | 70 | 23.23 | 85 | 50  | 70 | 4.50 | 50 | 9.75  | 75 | 67.66 | 710  | 2 |
| 405 | 11.55 | 65 | 45 | 13.80 | 55 | 65 | 26.07 | 85 | 75  | 70 | 4.50 | 50 | 9.75  | 75 | 65.67 | 750  | 2 |
| 406 | 13.13 | 80 | 45 | 13.23 | 50 | 65 | 24.37 | 65 | 75  | 75 | 4.50 | 50 | 9.75  | 75 | 64.97 | 880  | 2 |
| 407 | 11.55 | 60 | 50 | 14.38 | 60 | 65 | 30.03 | 85 | 100 | 80 | 6.75 | 75 | 11.05 | 85 | 73.76 | 3750 | 2 |
| 408 | 13.13 | 60 | 65 | 16.10 | 75 | 65 | 15.30 | 65 | 0   | 70 | 0.00 | 0  | 7.15  | 55 | 51.68 | 33   | 1 |
| 409 | 12.60 | 65 | 55 | 15.53 | 75 | 60 | 14.17 | 65 | 0   | 60 | 0.00 | 0  | 9.10  | 70 | 51.39 | 36   | 1 |
| 410 | 12.08 | 60 | 55 | 14.38 | 65 | 60 | 15.30 | 65 | 0   | 70 | 0.00 | 0  | 8.45  | 65 | 50.20 | 40   | 1 |
| 411 | 10.50 | 55 | 45 | 15.53 | 75 | 60 | 15.30 | 65 | 0   | 70 | 0.00 | 0  | 7.80  | 60 | 49.13 | 42   | 1 |
| 412 | 9.98  | 55 | 40 | 14.95 | 70 | 60 | 14.17 | 65 | 0   | 60 | 0.00 | 0  | 7.80  | 60 | 46.89 | 45   | 1 |
| 413 | 13.13 | 60 | 65 | 15.53 | 75 | 60 | 12.47 | 65 | 0   | 45 | 0.00 | 0  | 8.45  | 65 | 49.57 | 50   | 1 |
| 414 | 12.08 | 45 | 70 | 15.53 | 75 | 60 | 14.17 | 65 | 0   | 60 | 0.00 | 0  | 7.15  | 55 | 48.92 | 55   | 1 |
| 415 | 13.65 | 60 | 70 | 15.53 | 70 | 65 | 22.67 | 75 | 50  | 75 | 0.00 | 0  | 9.10  | 70 | 60.94 | 60   | 2 |
| 416 | 15.23 | 70 | 75 | 16.10 | 75 | 65 | 17.57 | 65 | 25  | 65 | 2.25 | 25 | 9.10  | 70 | 60.24 | 73   | 2 |
| 417 | 15.75 | 80 | 70 | 14.95 | 65 | 65 | 20.40 | 65 | 50  | 65 | 0.00 | 0  | 9.10  | 70 | 60.20 | 105  | 2 |
| 418 | 14.70 | 80 | 60 | 16.10 | 75 | 65 | 20.40 | 60 | 50  | 70 | 0.00 | 0  | 9.10  | 70 | 60.30 | 115  | 2 |
| 419 | 16.28 | 70 | 85 | 14.95 | 65 | 65 | 19.83 | 60 | 50  | 65 | 0.00 | 0  | 9.10  | 70 | 60.16 | 120  | 2 |
| 420 | 12.60 | 60 | 60 | 17.83 | 80 | 75 | 16.43 | 65 | 25  | 55 | 2.25 | 25 | 5.85  | 45 | 54.96 | 122  | 1 |
| 421 | 13.13 | 55 | 70 | 17.25 | 75 | 75 | 15.87 | 65 | 25  | 50 | 0.00 | 0  | 7.80  | 60 | 54.04 | 135  | 1 |

|     |       |    |    |       |    |    |       |    |     |    |      |    |      |    |       |     |   |
|-----|-------|----|----|-------|----|----|-------|----|-----|----|------|----|------|----|-------|-----|---|
| 422 | 14.18 | 70 | 65 | 17.25 | 75 | 75 | 17.00 | 65 | 25  | 60 | 2.25 | 25 | 8.45 | 65 | 59.13 | 160 | 1 |
| 423 | 16.80 | 80 | 80 | 13.80 | 55 | 65 | 19.83 | 70 | 50  | 55 | 2.25 | 25 | 9.10 | 70 | 61.78 | 265 | 2 |
| 424 | 12.60 | 55 | 65 | 17.83 | 80 | 75 | 10.77 | 50 | 0   | 45 | 0.00 | 0  | 8.45 | 65 | 49.64 | 35  | 1 |
| 425 | 12.60 | 55 | 65 | 17.83 | 80 | 75 | 11.90 | 50 | 0   | 55 | 0.00 | 0  | 5.85 | 45 | 48.18 | 36  | 1 |
| 426 | 15.23 | 80 | 65 | 13.80 | 55 | 65 | 22.10 | 75 | 75  | 45 | 0.00 | 0  | 9.10 | 70 | 60.23 | 40  | 2 |
| 427 | 13.65 | 60 | 70 | 16.68 | 75 | 70 | 13.03 | 55 | 0   | 60 | 0.00 | 0  | 5.85 | 45 | 49.21 | 45  | 1 |
| 428 | 13.13 | 55 | 70 | 17.83 | 80 | 75 | 14.17 | 65 | 0   | 60 | 0.00 | 0  | 7.15 | 55 | 52.27 | 48  | 1 |
| 429 | 16.28 | 75 | 80 | 13.80 | 55 | 65 | 21.53 | 60 | 75  | 55 | 0.00 | 0  | 8.45 | 65 | 60.06 | 55  | 2 |
| 430 | 14.18 | 70 | 65 | 15.53 | 70 | 65 | 21.53 | 55 | 75  | 60 | 0.00 | 0  | 9.10 | 70 | 60.33 | 60  | 2 |
| 431 | 15.75 | 70 | 80 | 15.53 | 70 | 65 | 20.97 | 60 | 75  | 50 | 0.00 | 0  | 7.80 | 60 | 60.04 | 70  | 2 |
| 432 | 12.08 | 60 | 55 | 17.25 | 75 | 75 | 14.17 | 60 | 0   | 65 | 0.00 | 0  | 8.45 | 65 | 51.94 | 75  | 1 |
| 433 | 16.80 | 80 | 80 | 14.95 | 65 | 65 | 19.27 | 50 | 50  | 70 | 0.00 | 0  | 9.10 | 70 | 60.12 | 80  | 2 |
| 434 | 14.70 | 70 | 70 | 17.83 | 80 | 75 | 10.77 | 60 | 0   | 35 | 0.00 | 0  | 7.80 | 60 | 51.09 | 88  | 1 |
| 435 | 14.18 | 85 | 50 | 14.38 | 60 | 65 | 23.80 | 60 | 75  | 75 | 0.00 | 0  | 8.45 | 65 | 60.80 | 93  | 2 |
| 436 | 14.18 | 85 | 50 | 13.80 | 55 | 65 | 23.80 | 60 | 100 | 50 | 0.00 | 0  | 9.10 | 70 | 60.88 | 150 | 2 |
| 437 | 15.23 | 65 | 80 | 14.38 | 60 | 65 | 24.37 | 80 | 75  | 60 | 2.25 | 25 | 9.10 | 70 | 65.32 | 370 | 2 |
| 438 | 16.80 | 80 | 80 | 13.80 | 55 | 65 | 26.63 | 85 | 75  | 75 | 4.50 | 50 | 9.75 | 75 | 71.48 | 450 | 2 |
| 439 | 15.75 | 75 | 75 | 16.10 | 70 | 70 | 11.90 | 60 | 0   | 45 | 0.00 | 0  | 8.45 | 65 | 52.20 | 40  | 1 |
| 440 | 13.65 | 60 | 70 | 16.10 | 65 | 75 | 12.47 | 65 | 0   | 45 | 0.00 | 0  | 7.15 | 55 | 49.37 | 45  | 1 |
| 441 | 9.45  | 45 | 45 | 15.53 | 65 | 70 | 11.90 | 50 | 0   | 55 | 0.00 | 0  | 7.15 | 55 | 44.03 | 50  | 1 |
| 442 | 14.18 | 65 | 70 | 17.25 | 80 | 70 | 13.03 | 55 | 0   | 60 | 0.00 | 0  | 7.80 | 60 | 52.26 | 56  | 1 |
| 443 | 11.03 | 60 | 45 | 17.83 | 80 | 75 | 15.30 | 70 | 0   | 65 | 0.00 | 0  | 5.85 | 45 | 50.00 | 63  | 1 |
| 444 | 14.70 | 65 | 75 | 14.95 | 65 | 65 | 22.67 | 85 | 50  | 65 | 0.00 | 0  | 7.80 | 60 | 60.12 | 72  | 2 |
| 445 | 13.65 | 60 | 70 | 16.68 | 70 | 75 | 12.47 | 50 | 0   | 60 | 0.00 | 0  | 7.15 | 55 | 49.94 | 88  | 1 |
| 446 | 15.23 | 60 | 85 | 15.53 | 70 | 65 | 21.53 | 85 | 50  | 55 | 0.00 | 0  | 8.45 | 65 | 60.73 | 91  | 2 |

|     |       |    |    |       |    |    |       |     |    |     |      |     |       |    |       |       |   |
|-----|-------|----|----|-------|----|----|-------|-----|----|-----|------|-----|-------|----|-------|-------|---|
| 447 | 14.18 | 55 | 80 | 14.95 | 65 | 65 | 21.53 | 85  | 50 | 55  | 2.25 | 25  | 7.80  | 60 | 60.71 | 200   | 2 |
| 448 | 15.23 | 70 | 75 | 14.95 | 65 | 65 | 20.40 | 70  | 50 | 60  | 2.25 | 25  | 8.45  | 65 | 61.28 | 230   | 2 |
| 449 | 15.23 | 80 | 65 | 13.80 | 55 | 65 | 21.53 | 70  | 50 | 70  | 4.50 | 50  | 9.75  | 75 | 64.81 | 560   | 2 |
| 450 | 17.33 | 75 | 90 | 14.95 | 70 | 60 | 26.63 | 80  | 75 | 80  | 9.00 | 100 | 9.75  | 75 | 77.66 | 920   | 3 |
| 451 | 17.33 | 85 | 80 | 16.68 | 75 | 70 | 30.03 | 90  | 80 | 95  | 9.00 | 100 | 12.35 | 95 | 85.38 | 3500  | 4 |
| 452 | 9.98  | 65 | 30 | 14.95 | 70 | 60 | 8.50  | 45  | 0  | 30  | 0.00 | 0   | 7.80  | 60 | 41.23 | 40    | 1 |
| 453 | 13.65 | 65 | 65 | 17.83 | 80 | 75 | 11.33 | 55  | 0  | 45  | 0.00 | 0   | 9.10  | 70 | 51.91 | 45    | 1 |
| 454 | 16.80 | 80 | 80 | 13.80 | 55 | 65 | 20.97 | 85  | 50 | 50  | 0.00 | 0   | 9.10  | 70 | 60.67 | 50    | 2 |
| 455 | 12.60 | 75 | 45 | 14.95 | 65 | 65 | 24.37 | 85  | 75 | 55  | 0.00 | 0   | 9.10  | 70 | 61.02 | 110   | 2 |
| 456 | 16.80 | 80 | 80 | 14.95 | 65 | 65 | 22.67 | 65  | 75 | 60  | 0.00 | 0   | 9.10  | 70 | 63.52 | 120   | 2 |
| 457 | 13.13 | 65 | 60 | 13.80 | 55 | 65 | 14.73 | 65  | 0  | 65  | 0.00 | 0   | 7.15  | 55 | 48.81 | 130   | 1 |
| 458 | 10.50 | 65 | 35 | 17.25 | 70 | 80 | 15.30 | 70  | 0  | 65  | 2.25 | 25  | 7.80  | 60 | 53.10 | 200   | 1 |
| 459 | 13.13 | 70 | 55 | 13.80 | 55 | 65 | 15.30 | 65  | 0  | 70  | 2.25 | 25  | 8.45  | 65 | 52.93 | 230   | 1 |
| 460 | 12.08 | 70 | 45 | 14.38 | 55 | 70 | 22.67 | 85  | 50 | 65  | 2.25 | 25  | 9.10  | 70 | 60.47 | 301   | 2 |
| 461 | 15.75 | 70 | 80 | 13.23 | 50 | 65 | 26.07 | 85  | 75 | 70  | 4.50 | 50  | 9.75  | 75 | 69.29 | 1050  | 2 |
| 462 | 16.80 | 80 | 80 | 13.23 | 50 | 65 | 22.67 | 50  | 75 | 75  | 4.50 | 50  | 9.75  | 75 | 66.94 | 1120  | 2 |
| 463 | 11.55 | 55 | 55 | 13.23 | 50 | 65 | 26.63 | 85  | 75 | 75  | 4.50 | 50  | 9.75  | 75 | 65.66 | 1180  | 2 |
| 464 | 17.33 | 80 | 85 | 14.95 | 70 | 60 | 26.63 | 80  | 75 | 80  | 9.00 | 100 | 9.75  | 75 | 77.66 | 1250  | 3 |
| 465 | 15.75 | 75 | 75 | 17.25 | 75 | 75 | 26.63 | 80  | 75 | 80  | 9.00 | 100 | 10.40 | 80 | 79.03 | 1270  | 3 |
| 466 | 16.28 | 80 | 75 | 16.68 | 70 | 75 | 27.77 | 90  | 75 | 80  | 9.00 | 100 | 10.40 | 80 | 80.12 | 1360  | 3 |
| 467 | 19.95 | 95 | 95 | 16.68 | 70 | 75 | 33.43 | 100 | 95 | 100 | 9.00 | 100 | 12.35 | 95 | 91.41 | 19000 | 4 |
| 468 | 13.65 | 60 | 70 | 15.53 | 75 | 60 | 14.73 | 65  | 0  | 65  | 0.00 | 0   | 8.45  | 65 | 52.36 | 32    | 1 |
| 469 | 12.60 | 75 | 45 | 15.53 | 75 | 60 | 14.73 | 65  | 0  | 65  | 0.00 | 0   | 7.80  | 60 | 50.66 | 45    | 1 |
| 470 | 13.65 | 65 | 65 | 15.53 | 75 | 60 | 13.60 | 60  | 0  | 60  | 0.00 | 0   | 7.15  | 55 | 49.93 | 65    | 1 |
| 471 | 15.23 | 70 | 75 | 17.25 | 65 | 85 | 18.70 | 70  | 50 | 45  | 0.00 | 0   | 9.10  | 70 | 60.28 | 75    | 2 |

|     |       |    |    |       |    |    |       |    |    |    |      |     |       |    |       |      |   |
|-----|-------|----|----|-------|----|----|-------|----|----|----|------|-----|-------|----|-------|------|---|
| 472 | 11.55 | 55 | 55 | 14.95 | 70 | 60 | 13.60 | 65 | 0  | 55 | 0.00 | 0   | 5.85  | 45 | 45.95 | 130  | 1 |
| 473 | 11.55 | 45 | 65 | 15.53 | 75 | 60 | 13.60 | 65 | 0  | 55 | 0.00 | 0   | 7.15  | 55 | 47.83 | 180  | 1 |
| 474 | 15.75 | 80 | 70 | 15.53 | 70 | 65 | 21.53 | 65 | 75 | 50 | 2.25 | 25  | 9.10  | 70 | 64.16 | 240  | 2 |
| 475 | 16.80 | 80 | 80 | 15.53 | 70 | 65 | 21.53 | 65 | 75 | 50 | 2.25 | 25  | 9.10  | 70 | 65.21 | 260  | 2 |
| 476 | 16.80 | 80 | 80 | 13.80 | 55 | 65 | 21.53 | 85 | 50 | 55 | 2.25 | 25  | 9.10  | 70 | 63.48 | 350  | 2 |
| 477 | 16.28 | 80 | 75 | 15.53 | 70 | 65 | 22.10 | 85 | 50 | 60 | 2.25 | 25  | 9.10  | 70 | 65.25 | 360  | 2 |
| 478 | 14.70 | 65 | 75 | 13.80 | 55 | 65 | 22.67 | 85 | 50 | 65 | 2.25 | 25  | 9.10  | 70 | 62.52 | 470  | 2 |
| 479 | 13.65 | 55 | 75 | 16.10 | 75 | 65 | 25.50 | 85 | 75 | 65 | 2.25 | 25  | 9.10  | 70 | 66.60 | 520  | 2 |
| 480 | 13.65 | 55 | 75 | 14.38 | 55 | 70 | 26.07 | 85 | 75 | 70 | 4.50 | 50  | 9.75  | 75 | 68.34 | 685  | 2 |
| 481 | 17.85 | 85 | 85 | 16.68 | 70 | 75 | 27.20 | 85 | 75 | 80 | 9.00 | 100 | 10.40 | 80 | 81.13 | 1150 | 3 |
| 482 | 17.85 | 85 | 85 | 17.25 | 75 | 75 | 27.20 | 85 | 75 | 80 | 9.00 | 100 | 9.10  | 70 | 80.40 | 1300 | 3 |
| 483 | 17.33 | 85 | 80 | 17.83 | 75 | 80 | 26.63 | 80 | 75 | 80 | 9.00 | 100 | 9.10  | 70 | 79.88 | 1850 | 3 |
| 484 | 12.60 | 60 | 60 | 15.53 | 75 | 60 | 14.73 | 60 | 0  | 70 | 0.00 | 0   | 7.15  | 55 | 50.01 | 41   | 1 |
| 485 | 12.60 | 65 | 55 | 15.53 | 75 | 60 | 16.43 | 70 | 0  | 75 | 0.00 | 0   | 7.80  | 60 | 52.36 | 45   | 1 |
| 486 | 14.70 | 65 | 75 | 16.10 | 60 | 80 | 20.40 | 50 | 75 | 55 | 0.00 | 0   | 9.10  | 70 | 60.30 | 62   | 2 |
| 487 | 14.18 | 70 | 65 | 17.25 | 75 | 75 | 20.40 | 60 | 50 | 70 | 0.00 | 0   | 9.10  | 70 | 60.93 | 75   | 2 |
| 488 | 16.80 | 80 | 80 | 14.95 | 65 | 65 | 20.97 | 55 | 75 | 55 | 0.00 | 0   | 9.10  | 70 | 61.82 | 120  | 2 |
| 489 | 12.08 | 60 | 55 | 16.10 | 80 | 60 | 14.17 | 65 | 0  | 60 | 0.00 | 0   | 9.10  | 70 | 51.44 | 125  | 1 |
| 490 | 12.08 | 55 | 60 | 15.53 | 75 | 60 | 14.73 | 65 | 0  | 65 | 0.00 | 0   | 8.45  | 65 | 50.78 | 136  | 1 |
| 491 | 14.70 | 80 | 60 | 15.53 | 55 | 80 | 20.97 | 55 | 75 | 55 | 0.00 | 0   | 9.10  | 70 | 60.29 | 210  | 2 |
| 492 | 16.80 | 80 | 80 | 13.80 | 55 | 65 | 22.67 | 65 | 75 | 60 | 2.25 | 25  | 9.10  | 70 | 64.62 | 280  | 2 |
| 493 | 15.23 | 80 | 65 | 14.95 | 65 | 65 | 22.10 | 85 | 50 | 60 | 2.25 | 25  | 9.10  | 70 | 63.63 | 350  | 2 |
| 494 | 15.75 | 70 | 80 | 13.80 | 55 | 65 | 22.10 | 85 | 50 | 60 | 2.25 | 25  | 9.10  | 70 | 63.00 | 370  | 2 |
| 495 | 15.23 | 65 | 80 | 14.38 | 60 | 65 | 22.10 | 85 | 50 | 60 | 2.25 | 25  | 9.10  | 70 | 63.05 | 440  | 2 |
| 496 | 15.23 | 80 | 65 | 13.80 | 55 | 65 | 20.97 | 75 | 50 | 60 | 2.25 | 25  | 9.10  | 70 | 61.34 | 530  | 2 |

|     |       |    |    |       |    |    |       |    |    |    |      |     |       |    |       |      |   |
|-----|-------|----|----|-------|----|----|-------|----|----|----|------|-----|-------|----|-------|------|---|
| 497 | 15.75 | 80 | 70 | 16.10 | 75 | 65 | 22.10 | 85 | 50 | 60 | 2.25 | 25  | 9.75  | 75 | 65.95 | 680  | 2 |
| 498 | 12.08 | 50 | 65 | 15.53 | 70 | 65 | 24.93 | 85 | 75 | 60 | 4.50 | 50  | 9.75  | 75 | 66.78 | 740  | 2 |
| 499 | 15.75 | 85 | 65 | 12.65 | 45 | 65 | 26.63 | 85 | 75 | 75 | 4.50 | 50  | 10.40 | 80 | 69.93 | 1250 | 2 |
| 500 | 16.80 | 80 | 80 | 16.68 | 70 | 75 | 26.63 | 80 | 75 | 80 | 9.00 | 100 | 9.10  | 70 | 78.21 | 1440 | 3 |
| 501 | 16.80 | 80 | 80 | 16.10 | 60 | 80 | 26.63 | 80 | 75 | 80 | 9.00 | 100 | 9.10  | 70 | 77.63 | 1800 | 3 |
| 502 | 12.60 | 55 | 65 | 15.53 | 75 | 60 | 15.87 | 75 | 0  | 65 | 2.25 | 25  | 8.45  | 65 | 54.69 | 35   | 1 |
| 503 | 13.65 | 70 | 60 | 15.53 | 75 | 60 | 13.03 | 65 | 0  | 50 | 0.00 | 0   | 7.15  | 55 | 49.36 | 65   | 1 |
| 504 | 15.23 | 80 | 65 | 13.80 | 55 | 65 | 20.97 | 65 | 75 | 45 | 2.25 | 25  | 8.45  | 65 | 60.69 | 122  | 2 |
| 505 | 12.08 | 70 | 45 | 16.68 | 85 | 60 | 14.73 | 65 | 0  | 65 | 0.00 | 0   | 6.50  | 50 | 49.98 | 126  | 1 |
| 506 | 16.80 | 80 | 80 | 14.95 | 65 | 65 | 23.23 | 85 | 75 | 45 | 2.25 | 25  | 9.10  | 70 | 66.33 | 130  | 2 |
| 507 | 16.28 | 75 | 80 | 14.38 | 60 | 65 | 20.97 | 65 | 75 | 45 | 2.25 | 25  | 8.45  | 65 | 62.32 | 130  | 2 |
| 508 | 13.13 | 70 | 55 | 15.53 | 75 | 60 | 14.17 | 65 | 0  | 60 | 0.00 | 0   | 5.85  | 45 | 48.67 | 210  | 1 |
| 509 | 12.60 | 65 | 55 | 14.95 | 65 | 65 | 16.43 | 75 | 25 | 45 | 2.25 | 25  | 8.45  | 65 | 54.68 | 270  | 1 |
| 510 | 14.18 | 80 | 55 | 13.80 | 55 | 65 | 21.53 | 85 | 50 | 55 | 2.25 | 25  | 9.10  | 70 | 60.86 | 360  | 2 |
| 511 | 14.70 | 70 | 70 | 13.80 | 55 | 65 | 21.53 | 75 | 50 | 65 | 2.25 | 25  | 9.10  | 70 | 61.38 | 425  | 2 |
| 512 | 15.23 | 70 | 75 | 14.38 | 60 | 65 | 22.67 | 85 | 50 | 65 | 4.50 | 50  | 9.10  | 70 | 65.87 | 500  | 2 |
| 513 | 16.28 | 80 | 75 | 12.08 | 40 | 65 | 22.67 | 85 | 50 | 65 | 4.50 | 50  | 9.10  | 70 | 64.62 | 750  | 2 |
| 514 | 16.80 | 80 | 80 | 13.23 | 50 | 65 | 21.53 | 70 | 50 | 70 | 4.50 | 50  | 9.75  | 75 | 65.81 | 1023 | 2 |
| 515 | 16.28 | 80 | 75 | 12.65 | 45 | 65 | 22.10 | 75 | 50 | 70 | 4.50 | 50  | 9.75  | 75 | 65.28 | 1069 | 2 |
| 516 | 16.80 | 80 | 80 | 17.83 | 80 | 75 | 27.77 | 90 | 75 | 80 | 9.00 | 100 | 9.10  | 70 | 80.49 | 1102 | 3 |
| 517 | 16.80 | 75 | 85 | 16.68 | 70 | 75 | 27.77 | 90 | 75 | 80 | 9.00 | 100 | 9.10  | 70 | 79.34 | 1120 | 3 |
| 518 | 17.85 | 85 | 85 | 15.53 | 70 | 65 | 26.63 | 80 | 75 | 80 | 9.00 | 100 | 9.10  | 70 | 78.11 | 1250 | 3 |
| 519 | 13.13 | 60 | 65 | 17.83 | 80 | 75 | 11.33 | 65 | 0  | 35 | 2.25 | 25  | 7.80  | 60 | 52.33 | 40   | 1 |
| 520 | 13.13 | 60 | 65 | 17.83 | 80 | 75 | 12.47 | 50 | 0  | 60 | 0.00 | 0   | 8.45  | 65 | 51.87 | 42   | 1 |
| 521 | 14.18 | 65 | 70 | 17.25 | 75 | 75 | 13.60 | 60 | 0  | 60 | 0.00 | 0   | 7.80  | 60 | 52.83 | 47   | 1 |

|     |       |    |    |       |    |    |       |    |    |    |      |     |      |    |       |      |   |
|-----|-------|----|----|-------|----|----|-------|----|----|----|------|-----|------|----|-------|------|---|
| 522 | 12.60 | 65 | 55 | 17.25 | 75 | 75 | 18.13 | 65 | 25 | 70 | 0.00 | 0   | 7.80 | 60 | 55.78 | 50   | 1 |
| 523 | 13.13 | 65 | 60 | 17.25 | 75 | 75 | 18.13 | 70 | 25 | 65 | 2.25 | 25  | 8.45 | 65 | 59.21 | 51   | 1 |
| 524 | 12.08 | 55 | 60 | 17.83 | 75 | 80 | 13.60 | 65 | 0  | 55 | 0.00 | 0   | 7.80 | 60 | 51.30 | 55   | 1 |
| 525 | 13.13 | 60 | 65 | 17.83 | 75 | 80 | 13.60 | 65 | 0  | 55 | 0.00 | 0   | 7.80 | 60 | 52.35 | 60   | 1 |
| 526 | 13.65 | 60 | 70 | 17.83 | 75 | 80 | 13.03 | 65 | 0  | 50 | 0.00 | 0   | 7.80 | 60 | 52.31 | 71   | 1 |
| 527 | 13.13 | 55 | 70 | 17.25 | 75 | 75 | 12.47 | 65 | 0  | 45 | 0.00 | 0   | 7.80 | 60 | 50.64 | 110  | 1 |
| 528 | 16.80 | 80 | 80 | 13.80 | 55 | 65 | 21.53 | 85 | 50 | 55 | 0.00 | 0   | 9.10 | 70 | 61.23 | 116  | 2 |
| 529 | 11.03 | 60 | 45 | 17.25 | 75 | 75 | 14.17 | 60 | 0  | 65 | 0.00 | 0   | 7.80 | 60 | 50.24 | 118  | 1 |
| 530 | 15.23 | 65 | 80 | 13.80 | 55 | 65 | 22.10 | 85 | 50 | 60 | 2.25 | 25  | 9.10 | 70 | 62.48 | 350  | 2 |
| 531 | 12.08 | 60 | 55 | 14.95 | 60 | 70 | 22.10 | 85 | 50 | 60 | 2.25 | 25  | 9.10 | 70 | 60.48 | 435  | 2 |
| 532 | 14.70 | 75 | 65 | 14.38 | 60 | 65 | 22.10 | 85 | 50 | 60 | 2.25 | 25  | 9.10 | 70 | 62.53 | 468  | 2 |
| 533 | 14.18 | 75 | 60 | 13.80 | 55 | 65 | 22.67 | 85 | 50 | 65 | 4.50 | 50  | 9.10 | 70 | 64.24 | 594  | 2 |
| 534 | 13.65 | 65 | 65 | 13.23 | 50 | 65 | 22.10 | 85 | 50 | 60 | 4.50 | 50  | 9.10 | 70 | 62.58 | 750  | 2 |
| 535 | 15.75 | 85 | 65 | 14.95 | 70 | 60 | 26.63 | 80 | 75 | 80 | 9.00 | 100 | 9.10 | 70 | 75.43 | 1250 | 3 |
| 536 | 10.50 | 55 | 45 | 17.25 | 75 | 75 | 14.17 | 65 | 0  | 60 | 0.00 | 0   | 7.80 | 60 | 49.72 | 32   | 1 |
| 537 | 11.03 | 60 | 45 | 17.25 | 75 | 75 | 13.03 | 65 | 0  | 50 | 0.00 | 0   | 7.80 | 60 | 49.11 | 38   | 1 |
| 538 | 13.13 | 70 | 55 | 17.25 | 75 | 75 | 14.73 | 65 | 0  | 65 | 2.25 | 25  | 7.80 | 60 | 55.16 | 45   | 1 |
| 539 | 12.60 | 45 | 75 | 17.25 | 75 | 75 | 14.17 | 65 | 0  | 60 | 0.00 | 0   | 7.80 | 60 | 51.82 | 52   | 1 |
| 540 | 14.70 | 80 | 60 | 16.10 | 65 | 75 | 22.10 | 70 | 75 | 50 | 0.00 | 0   | 8.45 | 65 | 61.35 | 53   | 2 |
| 541 | 13.13 | 65 | 60 | 17.25 | 75 | 75 | 18.13 | 65 | 25 | 70 | 0.00 | 0   | 8.45 | 65 | 56.96 | 72   | 1 |
| 542 | 13.65 | 60 | 70 | 16.68 | 80 | 65 | 13.03 | 60 | 0  | 55 | 2.25 | 25  | 8.45 | 65 | 54.06 | 130  | 1 |
| 543 | 15.23 | 80 | 65 | 14.95 | 55 | 75 | 20.97 | 85 | 50 | 50 | 0.00 | 0   | 9.10 | 70 | 60.24 | 170  | 2 |
| 544 | 12.08 | 70 | 45 | 15.53 | 60 | 75 | 21.53 | 85 | 50 | 55 | 2.25 | 25  | 9.10 | 70 | 60.48 | 240  | 2 |
| 545 | 14.18 | 55 | 80 | 14.95 | 65 | 65 | 24.37 | 85 | 75 | 55 | 2.25 | 25  | 9.10 | 70 | 64.84 | 310  | 2 |
| 546 | 15.75 | 80 | 70 | 13.80 | 55 | 65 | 24.93 | 85 | 75 | 60 | 2.25 | 25  | 9.10 | 70 | 65.83 | 360  | 2 |

|     |       |    |    |       |    |    |       |    |    |    |      |     |       |    |       |      |   |
|-----|-------|----|----|-------|----|----|-------|----|----|----|------|-----|-------|----|-------|------|---|
| 547 | 11.55 | 65 | 45 | 13.80 | 55 | 65 | 25.50 | 85 | 75 | 65 | 2.25 | 25  | 9.10  | 70 | 62.20 | 390  | 2 |
| 548 | 16.80 | 80 | 80 | 13.80 | 55 | 65 | 23.80 | 70 | 75 | 65 | 2.25 | 25  | 9.10  | 70 | 65.75 | 500  | 2 |
| 549 | 13.65 | 65 | 65 | 15.53 | 70 | 65 | 26.07 | 85 | 75 | 70 | 4.50 | 50  | 9.75  | 75 | 69.49 | 710  | 2 |
| 550 | 16.80 | 80 | 80 | 13.23 | 50 | 65 | 26.07 | 85 | 75 | 70 | 4.50 | 50  | 9.10  | 70 | 69.69 | 760  | 2 |
| 551 | 15.75 | 80 | 70 | 14.95 | 70 | 60 | 27.20 | 85 | 75 | 80 | 9.00 | 100 | 9.10  | 70 | 76.00 | 1450 | 3 |
| 552 | 13.13 | 60 | 65 | 16.10 | 75 | 65 | 14.17 | 65 | 0  | 60 | 0.00 | 0   | 7.80  | 60 | 51.19 | 37   | 1 |
| 553 | 12.60 | 55 | 65 | 16.68 | 75 | 70 | 14.17 | 60 | 0  | 65 | 0.00 | 0   | 7.80  | 60 | 51.24 | 45   | 1 |
| 554 | 14.70 | 60 | 80 | 13.80 | 55 | 65 | 23.23 | 70 | 75 | 60 | 0.00 | 0   | 8.45  | 65 | 60.18 | 51   | 2 |
| 555 | 12.08 | 55 | 60 | 17.25 | 75 | 75 | 13.60 | 65 | 0  | 55 | 0.00 | 0   | 7.15  | 55 | 50.08 | 56   | 1 |
| 556 | 12.60 | 60 | 60 | 17.25 | 75 | 75 | 14.17 | 65 | 0  | 60 | 0.00 | 0   | 7.80  | 60 | 51.82 | 64   | 1 |
| 557 | 12.60 | 60 | 60 | 17.25 | 75 | 75 | 13.03 | 70 | 0  | 45 | 0.00 | 0   | 8.45  | 65 | 51.33 | 75   | 1 |
| 558 | 13.65 | 65 | 65 | 17.25 | 75 | 75 | 15.30 | 65 | 0  | 70 | 2.25 | 25  | 7.80  | 60 | 56.25 | 155  | 1 |
| 559 | 16.28 | 75 | 80 | 14.95 | 65 | 65 | 24.93 | 85 | 75 | 60 | 2.25 | 25  | 9.10  | 70 | 67.51 | 265  | 2 |
| 560 | 16.28 | 85 | 70 | 13.80 | 55 | 65 | 25.50 | 85 | 75 | 65 | 2.25 | 25  | 9.10  | 70 | 66.93 | 382  | 2 |
| 561 | 15.75 | 80 | 70 | 15.53 | 70 | 65 | 25.50 | 85 | 75 | 65 | 2.25 | 25  | 9.10  | 70 | 68.13 | 425  | 2 |
| 562 | 14.18 | 65 | 70 | 13.80 | 55 | 65 | 25.50 | 85 | 75 | 65 | 4.50 | 50  | 9.10  | 70 | 67.08 | 450  | 2 |
| 563 | 16.80 | 80 | 80 | 15.53 | 70 | 65 | 24.37 | 75 | 75 | 65 | 4.50 | 50  | 9.10  | 70 | 70.29 | 530  | 2 |
| 564 | 14.18 | 55 | 80 | 13.80 | 55 | 65 | 25.50 | 85 | 75 | 65 | 4.50 | 50  | 9.75  | 75 | 67.73 | 580  | 2 |
| 565 | 13.13 | 60 | 65 | 14.38 | 60 | 65 | 24.93 | 85 | 70 | 65 | 4.50 | 50  | 9.10  | 70 | 66.03 | 710  | 2 |
| 566 | 15.23 | 85 | 60 | 13.80 | 55 | 65 | 26.07 | 85 | 75 | 70 | 6.75 | 75  | 10.40 | 80 | 72.24 | 750  | 2 |
| 567 | 16.80 | 80 | 80 | 15.53 | 70 | 65 | 26.63 | 80 | 75 | 80 | 9.00 | 100 | 9.10  | 70 | 77.06 | 1089 | 3 |
| 568 | 14.70 | 70 | 70 | 14.95 | 65 | 65 | 18.13 | 75 | 25 | 60 | 2.25 | 25  | 8.45  | 65 | 58.48 | 46   | 1 |
| 569 | 12.60 | 60 | 60 | 17.83 | 75 | 80 | 12.47 | 65 | 0  | 45 | 0.00 | 0   | 8.45  | 65 | 51.34 | 55   | 1 |
| 570 | 12.60 | 55 | 65 | 17.25 | 75 | 75 | 14.73 | 65 | 0  | 65 | 0.00 | 0   | 8.45  | 65 | 53.03 | 58   | 1 |
| 571 | 16.80 | 80 | 80 | 13.23 | 50 | 65 | 21.53 | 60 | 75 | 55 | 0.00 | 0   | 9.10  | 70 | 60.66 | 60   | 2 |

|     |       |    |    |       |    |    |       |    |    |    |      |     |      |    |       |      |   |
|-----|-------|----|----|-------|----|----|-------|----|----|----|------|-----|------|----|-------|------|---|
| 572 | 16.80 | 80 | 80 | 13.80 | 55 | 65 | 21.53 | 60 | 75 | 55 | 0.00 | 0   | 9.10 | 70 | 61.23 | 115  | 2 |
| 573 | 12.60 | 60 | 60 | 18.40 | 80 | 80 | 14.17 | 60 | 0  | 65 | 2.25 | 25  | 7.80 | 60 | 55.22 | 160  | 1 |
| 574 | 12.60 | 55 | 65 | 15.53 | 75 | 60 | 14.17 | 65 | 0  | 60 | 0.00 | 0   | 7.80 | 60 | 50.09 | 175  | 1 |
| 575 | 14.70 | 70 | 70 | 16.10 | 65 | 75 | 20.40 | 65 | 55 | 60 | 0.00 | 0   | 9.10 | 70 | 60.30 | 188  | 2 |
| 576 | 14.18 | 55 | 80 | 14.95 | 55 | 75 | 19.83 | 65 | 50 | 60 | 2.25 | 25  | 9.10 | 70 | 60.31 | 192  | 2 |
| 577 | 12.08 | 50 | 65 | 14.95 | 50 | 80 | 22.10 | 65 | 65 | 65 | 2.25 | 25  | 9.10 | 70 | 60.48 | 215  | 2 |
| 578 | 12.08 | 55 | 60 | 16.68 | 70 | 75 | 20.40 | 70 | 50 | 60 | 2.25 | 25  | 9.10 | 70 | 60.50 | 236  | 2 |
| 579 | 16.80 | 80 | 80 | 13.80 | 55 | 65 | 19.83 | 65 | 50 | 60 | 2.25 | 25  | 9.10 | 70 | 61.78 | 275  | 2 |
| 580 | 16.80 | 80 | 80 | 13.80 | 55 | 65 | 19.83 | 65 | 50 | 60 | 2.25 | 25  | 9.10 | 70 | 61.78 | 280  | 2 |
| 581 | 15.75 | 70 | 80 | 16.10 | 75 | 65 | 20.97 | 70 | 50 | 65 | 2.25 | 25  | 9.10 | 70 | 64.17 | 293  | 2 |
| 582 | 11.55 | 55 | 55 | 12.65 | 45 | 65 | 23.80 | 85 | 50 | 75 | 4.50 | 50  | 9.75 | 75 | 62.25 | 1240 | 2 |
| 583 | 17.85 | 80 | 90 | 19.55 | 85 | 85 | 26.63 | 80 | 75 | 80 | 9.00 | 100 | 9.75 | 75 | 82.78 | 1350 | 3 |
| 584 | 17.85 | 85 | 85 | 16.68 | 70 | 75 | 26.63 | 80 | 75 | 80 | 9.00 | 100 | 9.75 | 75 | 79.91 | 1400 | 3 |
| 585 | 17.85 | 85 | 85 | 16.68 | 70 | 75 | 26.63 | 80 | 75 | 80 | 4.50 | 50  | 9.75 | 75 | 75.41 | 1510 | 3 |
| 586 | 11.03 | 50 | 55 | 14.38 | 65 | 60 | 14.17 | 65 | 0  | 60 | 0.00 | 0   | 7.15 | 55 | 46.72 | 35   | 1 |
| 587 | 14.18 | 70 | 65 | 14.38 | 60 | 65 | 13.60 | 65 | 0  | 55 | 2.25 | 25  | 6.50 | 50 | 50.90 | 38   | 1 |
| 588 | 13.13 | 65 | 60 | 13.23 | 50 | 65 | 14.17 | 55 | 0  | 70 | 0.00 | 0   | 8.45 | 65 | 48.97 | 43   | 1 |
| 589 | 16.80 | 80 | 80 | 15.53 | 70 | 65 | 23.23 | 75 | 75 | 55 | 0.00 | 0   | 9.10 | 70 | 64.66 | 113  | 2 |
| 590 | 13.65 | 65 | 65 | 14.38 | 60 | 65 | 11.90 | 60 | 0  | 45 | 0.00 | 0   | 8.45 | 65 | 48.38 | 168  | 1 |
| 591 | 13.13 | 65 | 60 | 13.23 | 60 | 55 | 15.30 | 65 | 0  | 70 | 0.00 | 0   | 9.10 | 70 | 50.75 | 175  | 1 |
| 592 | 11.55 | 55 | 55 | 14.38 | 60 | 65 | 13.60 | 70 | 0  | 50 | 0.00 | 0   | 7.80 | 60 | 47.33 | 220  | 1 |
| 593 | 14.18 | 65 | 70 | 13.80 | 55 | 65 | 23.80 | 75 | 75 | 60 | 0.00 | 0   | 9.75 | 75 | 61.53 | 240  | 2 |
| 594 | 14.70 | 75 | 65 | 14.95 | 65 | 65 | 19.27 | 75 | 25 | 70 | 0.00 | 0   | 9.75 | 75 | 58.67 | 265  | 1 |
| 595 | 17.33 | 80 | 85 | 15.53 | 70 | 65 | 23.80 | 75 | 75 | 60 | 0.00 | 0   | 9.75 | 75 | 66.40 | 271  | 2 |
| 596 | 15.75 | 85 | 65 | 14.38 | 60 | 65 | 24.93 | 85 | 75 | 60 | 2.25 | 25  | 9.75 | 75 | 67.06 | 350  | 2 |



|     |       |    |    |       |    |    |       |     |    |     |      |     |       |    |       |       |   |
|-----|-------|----|----|-------|----|----|-------|-----|----|-----|------|-----|-------|----|-------|-------|---|
| 597 | 16.80 | 80 | 80 | 13.23 | 50 | 65 | 26.07 | 85  | 75 | 70  | 2.25 | 25  | 9.75  | 75 | 68.09 | 1023  | 2 |
| 598 | 14.70 | 75 | 65 | 13.23 | 50 | 65 | 23.80 | 65  | 75 | 70  | 2.25 | 25  | 9.75  | 75 | 63.73 | 1065  | 2 |
| 599 | 16.28 | 75 | 80 | 12.65 | 45 | 65 | 26.63 | 85  | 75 | 75  | 2.25 | 25  | 9.75  | 75 | 67.56 | 1132  | 2 |
| 600 | 16.80 | 75 | 85 | 17.25 | 75 | 75 | 27.77 | 85  | 80 | 80  | 4.50 | 50  | 9.75  | 75 | 76.07 | 1150  | 3 |
| 601 | 19.95 | 95 | 95 | 18.98 | 75 | 90 | 33.43 | 100 | 95 | 100 | 9.00 | 100 | 12.35 | 95 | 93.71 | 12000 | 4 |
| 602 | 14.18 | 65 | 70 | 16.10 | 60 | 80 | 15.30 | 65  | 0  | 70  | 0.00 | 0   | 7.80  | 60 | 53.38 | 38    | 1 |
| 603 | 10.50 | 30 | 70 | 16.10 | 65 | 75 | 15.30 | 65  | 0  | 70  | 0.00 | 0   | 8.45  | 65 | 50.35 | 45    | 1 |
| 604 | 10.50 | 35 | 65 | 15.53 | 55 | 80 | 14.17 | 60  | 0  | 65  | 2.25 | 25  | 7.80  | 60 | 50.24 | 52    | 1 |
| 605 | 14.70 | 65 | 75 | 14.95 | 65 | 65 | 22.10 | 60  | 75 | 60  | 0.00 | 0   | 9.10  | 70 | 60.85 | 70    | 2 |
| 606 | 16.80 | 80 | 80 | 14.38 | 60 | 65 | 22.10 | 60  | 75 | 60  | 0.00 | 0   | 9.10  | 70 | 62.38 | 120   | 2 |
| 607 | 17.33 | 80 | 85 | 13.80 | 55 | 65 | 22.10 | 60  | 75 | 60  | 0.00 | 0   | 9.10  | 70 | 62.33 | 128   | 2 |
| 608 | 11.03 | 45 | 60 | 13.80 | 60 | 60 | 14.73 | 65  | 0  | 65  | 0.00 | 0   | 7.80  | 60 | 47.36 | 133   | 1 |
| 609 | 16.28 | 70 | 85 | 14.95 | 65 | 65 | 21.53 | 55  | 75 | 60  | 0.00 | 0   | 9.10  | 70 | 61.86 | 140   | 2 |
| 610 | 13.13 | 70 | 55 | 16.10 | 65 | 75 | 14.73 | 65  | 0  | 65  | 0.00 | 0   | 7.80  | 60 | 51.76 | 146   | 1 |
| 611 | 13.13 | 65 | 60 | 16.10 | 65 | 75 | 14.73 | 65  | 0  | 65  | 0.00 | 0   | 7.80  | 60 | 51.76 | 152   | 1 |
| 612 | 15.75 | 70 | 80 | 14.38 | 60 | 65 | 22.10 | 60  | 75 | 60  | 0.00 | 0   | 9.10  | 70 | 61.33 | 158   | 2 |
| 613 | 12.08 | 55 | 60 | 12.65 | 45 | 65 | 12.47 | 65  | 0  | 45  | 2.25 | 25  | 9.10  | 70 | 48.54 | 166   | 1 |
| 614 | 13.13 | 70 | 55 | 15.53 | 55 | 80 | 22.67 | 65  | 75 | 60  | 0.00 | 0   | 9.10  | 70 | 60.42 | 180   | 2 |
| 615 | 13.65 | 80 | 50 | 14.38 | 60 | 65 | 23.23 | 70  | 75 | 60  | 0.00 | 0   | 9.10  | 70 | 60.36 | 210   | 2 |
| 616 | 16.80 | 80 | 80 | 13.80 | 55 | 65 | 26.07 | 85  | 75 | 70  | 2.25 | 25  | 10.40 | 80 | 69.32 | 1100  | 2 |
| 617 | 16.28 | 70 | 85 | 17.83 | 80 | 75 | 27.77 | 80  | 80 | 85  | 4.50 | 50  | 9.75  | 75 | 76.12 | 1120  | 3 |
| 618 | 19.95 | 95 | 95 | 14.95 | 65 | 65 | 33.43 | 100 | 95 | 100 | 9.00 | 100 | 12.35 | 95 | 89.68 | 16000 | 4 |
| 619 | 12.08 | 50 | 65 | 17.25 | 85 | 65 | 14.73 | 65  | 0  | 65  | 0.00 | 0   | 7.80  | 60 | 51.86 | 40    | 1 |
| 620 | 10.50 | 45 | 55 | 14.95 | 55 | 75 | 13.60 | 65  | 0  | 55  | 0.00 | 0   | 7.80  | 60 | 46.85 | 43    | 1 |
| 621 | 17.33 | 85 | 80 | 15.53 | 70 | 65 | 24.37 | 75  | 75 | 65  | 0.00 | 0   | 9.10  | 70 | 66.32 | 120   | 2 |

|     |       |    |    |       |    |    |       |     |    |     |      |     |       |    |       |       |   |
|-----|-------|----|----|-------|----|----|-------|-----|----|-----|------|-----|-------|----|-------|-------|---|
| 622 | 11.03 | 60 | 45 | 15.53 | 60 | 75 | 14.17 | 60  | 0  | 65  | 0.00 | 0   | 8.45  | 65 | 49.17 | 130   | 1 |
| 623 | 14.70 | 80 | 60 | 15.53 | 70 | 65 | 23.80 | 75  | 75 | 60  | 0.00 | 0   | 8.45  | 65 | 62.48 | 135   | 2 |
| 624 | 9.98  | 35 | 60 | 15.53 | 65 | 70 | 14.17 | 60  | 0  | 65  | 0.00 | 0   | 7.80  | 60 | 47.47 | 150   | 1 |
| 625 | 16.28 | 75 | 80 | 13.80 | 55 | 65 | 23.23 | 75  | 75 | 55  | 0.00 | 0   | 9.10  | 70 | 62.41 | 170   | 2 |
| 626 | 16.28 | 80 | 75 | 12.65 | 50 | 60 | 24.37 | 75  | 75 | 65  | 2.25 | 25  | 9.75  | 75 | 65.29 | 1032  | 2 |
| 627 | 14.18 | 65 | 70 | 13.23 | 50 | 65 | 24.93 | 75  | 75 | 70  | 2.25 | 25  | 9.75  | 75 | 64.33 | 1069  | 2 |
| 628 | 15.23 | 65 | 80 | 13.23 | 50 | 65 | 24.37 | 70  | 75 | 70  | 2.25 | 25  | 9.75  | 75 | 64.82 | 1075  | 2 |
| 629 | 15.75 | 80 | 70 | 12.65 | 50 | 60 | 24.93 | 75  | 75 | 70  | 2.25 | 25  | 9.75  | 75 | 65.33 | 1098  | 2 |
| 630 | 16.80 | 75 | 85 | 16.68 | 70 | 75 | 26.63 | 80  | 75 | 80  | 6.75 | 75  | 9.75  | 75 | 76.61 | 1150  | 3 |
| 631 | 15.75 | 75 | 75 | 17.83 | 80 | 75 | 27.77 | 85  | 75 | 85  | 4.50 | 50  | 9.75  | 75 | 75.59 | 1178  | 3 |
| 632 | 16.28 | 80 | 75 | 16.68 | 70 | 75 | 27.77 | 90  | 75 | 80  | 6.75 | 75  | 9.75  | 75 | 77.22 | 1185  | 3 |
| 633 | 16.80 | 95 | 65 | 16.68 | 75 | 70 | 33.43 | 100 | 95 | 100 | 9.00 | 100 | 12.35 | 95 | 88.26 | 23000 | 4 |
| 634 | 13.13 | 65 | 60 | 16.10 | 65 | 75 | 14.17 | 65  | 0  | 60  | 0.00 | 0   | 8.45  | 65 | 51.84 | 37    | 1 |
| 635 | 12.60 | 60 | 60 | 13.23 | 45 | 70 | 14.17 | 65  | 0  | 60  | 2.25 | 25  | 7.80  | 60 | 50.04 | 41    | 1 |
| 636 | 10.50 | 45 | 55 | 14.38 | 55 | 70 | 14.73 | 65  | 0  | 65  | 0.00 | 0   | 9.10  | 70 | 48.71 | 45    | 1 |
| 637 | 13.65 | 60 | 70 | 14.95 | 55 | 75 | 13.60 | 65  | 0  | 55  | 0.00 | 0   | 9.10  | 70 | 51.30 | 48    | 1 |
| 638 | 14.70 | 65 | 75 | 16.10 | 65 | 75 | 15.30 | 65  | 0  | 70  | 2.25 | 25  | 8.45  | 65 | 56.80 | 52    | 1 |
| 639 | 10.50 | 45 | 55 | 13.80 | 60 | 60 | 16.43 | 75  | 0  | 70  | 0.00 | 0   | 9.10  | 70 | 49.83 | 55    | 1 |
| 640 | 7.35  | 35 | 35 | 13.80 | 65 | 55 | 19.83 | 75  | 25 | 75  | 2.25 | 25  | 8.45  | 65 | 51.68 | 65    | 1 |
| 641 | 16.80 | 80 | 80 | 13.80 | 55 | 65 | 22.67 | 75  | 75 | 50  | 0.00 | 0   | 8.45  | 65 | 61.72 | 140   | 2 |
| 642 | 11.55 | 55 | 55 | 12.65 | 45 | 65 | 15.30 | 65  | 0  | 70  | 0.00 | 0   | 8.45  | 65 | 47.95 | 180   | 1 |
| 643 | 11.03 | 60 | 45 | 16.68 | 65 | 80 | 24.37 | 75  | 75 | 65  | 0.00 | 0   | 8.45  | 65 | 60.52 | 220   | 2 |
| 644 | 11.03 | 55 | 50 | 16.10 | 60 | 80 | 24.37 | 75  | 75 | 65  | 0.00 | 0   | 9.10  | 70 | 60.59 | 240   | 2 |
| 645 | 11.55 | 60 | 50 | 17.25 | 70 | 80 | 22.67 | 60  | 75 | 65  | 0.00 | 0   | 9.10  | 70 | 60.57 | 246   | 2 |
| 646 | 16.80 | 80 | 80 | 14.38 | 60 | 65 | 23.23 | 75  | 75 | 55  | 0.00 | 0   | 8.45  | 65 | 62.86 | 255   | 2 |

|     |       |    |    |       |    |    |       |     |    |    |      |     |       |    |       |       |   |
|-----|-------|----|----|-------|----|----|-------|-----|----|----|------|-----|-------|----|-------|-------|---|
| 647 | 15.75 | 80 | 70 | 13.80 | 55 | 65 | 23.23 | 75  | 75 | 55 | 0.00 | 0   | 9.10  | 70 | 61.88 | 263   | 2 |
| 648 | 14.18 | 55 | 80 | 13.80 | 55 | 65 | 23.80 | 75  | 75 | 60 | 0.00 | 0   | 9.10  | 70 | 60.88 | 267   | 2 |
| 649 | 13.65 | 70 | 60 | 14.38 | 60 | 65 | 24.37 | 75  | 75 | 65 | 0.00 | 0   | 9.10  | 70 | 61.49 | 288   | 2 |
| 650 | 13.65 | 50 | 80 | 14.38 | 60 | 65 | 24.37 | 80  | 75 | 60 | 0.00 | 0   | 9.10  | 70 | 61.49 | 295   | 2 |
| 651 | 15.23 | 80 | 65 | 14.38 | 60 | 65 | 25.50 | 80  | 75 | 70 | 2.25 | 25  | 9.75  | 75 | 67.10 | 575   | 2 |
| 652 | 12.60 | 60 | 60 | 12.65 | 45 | 65 | 14.73 | 65  | 0  | 65 | 0.00 | 0   | 7.80  | 60 | 47.78 | 36    | 1 |
| 653 | 11.03 | 45 | 60 | 16.68 | 80 | 65 | 14.17 | 65  | 0  | 60 | 0.00 | 0   | 8.45  | 65 | 50.32 | 38    | 1 |
| 654 | 12.08 | 60 | 55 | 14.38 | 55 | 70 | 12.47 | 65  | 0  | 45 | 0.00 | 0   | 8.45  | 65 | 47.37 | 45    | 1 |
| 655 | 11.03 | 60 | 45 | 14.95 | 65 | 65 | 13.03 | 70  | 0  | 45 | 0.00 | 0   | 7.80  | 60 | 46.81 | 80    | 1 |
| 656 | 14.18 | 55 | 80 | 15.53 | 55 | 80 | 22.67 | 80  | 75 | 45 | 0.00 | 0   | 9.10  | 70 | 61.47 | 125   | 2 |
| 657 | 11.03 | 60 | 45 | 13.80 | 60 | 60 | 14.73 | 65  | 0  | 65 | 0.00 | 0   | 7.15  | 55 | 46.71 | 132   | 1 |
| 658 | 13.13 | 70 | 55 | 14.95 | 65 | 65 | 14.17 | 65  | 0  | 60 | 2.25 | 25  | 6.50  | 50 | 50.99 | 139   | 1 |
| 659 | 15.23 | 80 | 65 | 13.80 | 55 | 65 | 23.23 | 80  | 75 | 50 | 0.00 | 0   | 8.45  | 65 | 60.71 | 210   | 2 |
| 660 | 14.70 | 75 | 65 | 15.53 | 70 | 65 | 23.80 | 75  | 75 | 60 | 0.00 | 0   | 9.10  | 70 | 63.13 | 245   | 2 |
| 661 | 15.75 | 70 | 80 | 13.80 | 55 | 65 | 23.80 | 80  | 75 | 55 | 2.25 | 25  | 9.10  | 70 | 64.70 | 306   | 2 |
| 662 | 11.55 | 55 | 55 | 15.53 | 55 | 80 | 22.67 | 60  | 75 | 65 | 2.25 | 25  | 9.10  | 70 | 61.09 | 411   | 2 |
| 663 | 15.23 | 65 | 80 | 12.65 | 45 | 65 | 24.37 | 80  | 75 | 60 | 2.25 | 25  | 9.10  | 70 | 63.59 | 445   | 2 |
| 664 | 14.18 | 85 | 50 | 13.23 | 50 | 65 | 21.53 | 55  | 75 | 60 | 2.25 | 25  | 9.75  | 75 | 60.93 | 500   | 2 |
| 665 | 14.18 | 80 | 55 | 13.80 | 55 | 65 | 23.80 | 80  | 75 | 55 | 2.25 | 25  | 9.10  | 70 | 63.13 | 560   | 2 |
| 666 | 14.18 | 80 | 55 | 13.23 | 50 | 65 | 24.93 | 80  | 75 | 65 | 4.50 | 50  | 9.75  | 75 | 66.58 | 605   | 2 |
| 667 | 16.28 | 75 | 80 | 13.23 | 50 | 65 | 26.07 | 85  | 75 | 70 | 2.25 | 25  | 9.10  | 70 | 66.92 | 711   | 2 |
| 668 | 16.28 | 80 | 75 | 16.68 | 70 | 75 | 27.20 | 85  | 75 | 80 | 6.75 | 75  | 9.75  | 75 | 76.65 | 1100  | 3 |
| 669 | 18.90 | 95 | 85 | 16.68 | 75 | 70 | 32.30 | 100 | 95 | 90 | 9.00 | 100 | 12.35 | 95 | 89.23 | 18000 | 4 |
| 670 | 13.13 | 55 | 70 | 14.95 | 65 | 65 | 9.63  | 55  | 0  | 30 | 0.00 | 0   | 8.45  | 65 | 46.16 | 41    | 1 |
| 671 | 12.60 | 55 | 65 | 15.53 | 70 | 65 | 11.90 | 60  | 0  | 45 | 0.00 | 0   | 8.45  | 65 | 48.48 | 46    | 1 |

|     |       |    |    |       |    |    |       |     |    |     |      |     |       |    |       |       |   |
|-----|-------|----|----|-------|----|----|-------|-----|----|-----|------|-----|-------|----|-------|-------|---|
| 672 | 13.13 | 65 | 60 | 15.53 | 80 | 55 | 14.73 | 65  | 0  | 65  | 0.00 | 0   | 9.10  | 70 | 52.48 | 58    | 1 |
| 673 | 13.13 | 70 | 55 | 16.10 | 75 | 65 | 11.90 | 70  | 0  | 35  | 0.00 | 0   | 7.80  | 60 | 48.93 | 72    | 1 |
| 674 | 9.45  | 45 | 45 | 14.95 | 65 | 65 | 15.30 | 75  | 25 | 35  | 2.25 | 25  | 8.45  | 65 | 50.40 | 135   | 1 |
| 675 | 15.75 | 70 | 80 | 15.53 | 55 | 80 | 20.97 | 75  | 75 | 35  | 0.00 | 0   | 9.10  | 70 | 61.34 | 220   | 2 |
| 676 | 13.65 | 80 | 50 | 14.95 | 65 | 65 | 24.37 | 85  | 75 | 55  | 0.00 | 0   | 9.10  | 70 | 62.07 | 265   | 2 |
| 677 | 15.23 | 65 | 80 | 13.80 | 55 | 65 | 22.10 | 75  | 75 | 45  | 0.00 | 0   | 9.10  | 70 | 60.23 | 278   | 2 |
| 678 | 15.23 | 80 | 65 | 14.95 | 65 | 65 | 24.37 | 85  | 75 | 55  | 0.00 | 0   | 9.10  | 70 | 63.64 | 285   | 2 |
| 679 | 14.70 | 60 | 80 | 14.95 | 65 | 65 | 24.93 | 85  | 75 | 60  | 2.25 | 25  | 9.10  | 70 | 65.93 | 360   | 2 |
| 680 | 16.28 | 80 | 75 | 13.80 | 55 | 65 | 24.37 | 85  | 75 | 55  | 2.25 | 25  | 9.10  | 70 | 65.79 | 530   | 2 |
| 681 | 16.28 | 80 | 75 | 14.95 | 55 | 75 | 22.67 | 85  | 50 | 65  | 2.25 | 25  | 9.75  | 75 | 65.89 | 700   | 2 |
| 682 | 14.18 | 55 | 80 | 13.23 | 50 | 65 | 23.23 | 85  | 50 | 70  | 2.25 | 25  | 11.05 | 85 | 63.93 | 1120  | 2 |
| 683 | 12.60 | 50 | 70 | 12.65 | 45 | 65 | 23.80 | 85  | 50 | 75  | 2.25 | 25  | 10.40 | 80 | 61.70 | 1170  | 2 |
| 684 | 17.33 | 85 | 80 | 12.65 | 45 | 65 | 23.23 | 80  | 50 | 75  | 2.25 | 25  | 10.40 | 80 | 65.86 | 1200  | 2 |
| 685 | 17.33 | 85 | 80 | 17.25 | 75 | 75 | 26.63 | 80  | 75 | 80  | 4.50 | 50  | 10.40 | 80 | 76.11 | 1300  | 3 |
| 686 | 16.28 | 75 | 80 | 17.25 | 75 | 75 | 26.63 | 80  | 75 | 80  | 4.50 | 50  | 10.40 | 80 | 75.06 | 1350  | 3 |
| 687 | 18.38 | 95 | 80 | 16.68 | 80 | 65 | 33.43 | 100 | 95 | 100 | 9.00 | 100 | 12.35 | 95 | 89.83 | 23000 | 4 |
| 688 | 11.03 | 40 | 65 | 14.95 | 65 | 65 | 15.87 | 65  | 0  | 75  | 0.00 | 0   | 8.45  | 65 | 50.29 | 46    | 1 |
| 689 | 11.03 | 45 | 60 | 15.53 | 55 | 80 | 14.17 | 60  | 0  | 65  | 0.00 | 0   | 9.10  | 70 | 49.82 | 52    | 1 |
| 690 | 13.65 | 65 | 65 | 14.38 | 45 | 80 | 14.17 | 60  | 0  | 65  | 0.00 | 0   | 9.10  | 70 | 51.29 | 58    | 1 |
| 691 | 8.93  | 30 | 55 | 16.68 | 65 | 80 | 14.73 | 60  | 0  | 70  | 0.00 | 0   | 7.15  | 55 | 47.48 | 60    | 1 |
| 692 | 16.80 | 75 | 85 | 14.95 | 50 | 80 | 19.83 | 80  | 50 | 45  | 0.00 | 0   | 9.10  | 70 | 60.68 | 200   | 2 |
| 693 | 15.23 | 65 | 80 | 16.10 | 60 | 80 | 20.40 | 80  | 50 | 50  | 0.00 | 0   | 8.45  | 65 | 60.18 | 210   | 2 |
| 694 | 12.60 | 55 | 65 | 16.10 | 60 | 80 | 10.77 | 60  | 0  | 35  | 2.25 | 25  | 6.50  | 50 | 48.22 | 215   | 1 |
| 695 | 15.75 | 65 | 85 | 16.10 | 60 | 80 | 19.83 | 75  | 50 | 50  | 0.00 | 0   | 8.45  | 65 | 60.13 | 220   | 2 |
| 696 | 15.75 | 70 | 80 | 14.95 | 65 | 65 | 20.40 | 80  | 50 | 50  | 0.00 | 0   | 9.10  | 70 | 60.20 | 245   | 2 |

|     |       |    |    |       |    |    |       |     |    |     |      |     |       |    |       |       |   |
|-----|-------|----|----|-------|----|----|-------|-----|----|-----|------|-----|-------|----|-------|-------|---|
| 697 | 17.85 | 80 | 90 | 14.95 | 65 | 65 | 21.53 | 65  | 75 | 50  | 0.00 | 0   | 8.45  | 65 | 62.78 | 260   | 2 |
| 698 | 15.75 | 85 | 65 | 13.80 | 55 | 65 | 23.23 | 80  | 75 | 50  | 0.00 | 0   | 9.10  | 70 | 61.88 | 275   | 2 |
| 699 | 14.18 | 55 | 80 | 12.65 | 45 | 65 | 24.93 | 80  | 75 | 65  | 2.25 | 25  | 9.75  | 75 | 63.76 | 1050  | 2 |
| 700 | 11.55 | 65 | 45 | 13.23 | 50 | 65 | 25.50 | 80  | 75 | 70  | 2.25 | 25  | 9.75  | 75 | 62.28 | 1080  | 2 |
| 701 | 12.60 | 80 | 40 | 14.38 | 60 | 65 | 26.07 | 80  | 75 | 75  | 2.25 | 25  | 9.75  | 75 | 65.04 | 1095  | 2 |
| 702 | 17.33 | 80 | 85 | 17.25 | 75 | 75 | 26.07 | 80  | 70 | 80  | 4.50 | 50  | 10.40 | 80 | 75.54 | 1120  | 3 |
| 703 | 16.80 | 75 | 85 | 16.68 | 70 | 75 | 28.33 | 95  | 75 | 80  | 4.50 | 50  | 10.40 | 80 | 76.71 | 1200  | 3 |
| 704 | 17.33 | 95 | 70 | 16.68 | 80 | 65 | 33.43 | 100 | 95 | 100 | 9.00 | 100 | 12.35 | 95 | 88.78 | 31000 | 4 |
| 705 | 12.60 | 60 | 60 | 13.23 | 35 | 80 | 11.90 | 60  | 0  | 45  | 0.00 | 0   | 7.80  | 60 | 45.53 | 40    | 1 |
| 706 | 10.50 | 55 | 45 | 16.68 | 65 | 80 | 14.17 | 60  | 0  | 65  | 0.00 | 0   | 7.15  | 55 | 48.49 | 42    | 1 |
| 707 | 10.50 | 45 | 55 | 17.25 | 70 | 80 | 10.77 | 60  | 0  | 35  | 0.00 | 0   | 8.45  | 65 | 46.97 | 45    | 1 |
| 708 | 11.03 | 35 | 70 | 18.98 | 85 | 80 | 14.17 | 60  | 0  | 65  | 0.00 | 0   | 7.15  | 55 | 51.32 | 54    | 1 |
| 709 | 11.03 | 55 | 50 | 16.68 | 65 | 80 | 14.17 | 60  | 0  | 65  | 0.00 | 0   | 9.10  | 70 | 50.97 | 60    | 1 |
| 710 | 17.33 | 80 | 85 | 13.80 | 55 | 65 | 24.37 | 85  | 75 | 55  | 0.00 | 0   | 8.45  | 65 | 63.94 | 72    | 2 |
| 711 | 15.75 | 70 | 80 | 15.53 | 70 | 65 | 24.37 | 85  | 75 | 55  | 0.00 | 0   | 9.10  | 70 | 64.74 | 112   | 2 |
| 712 | 13.13 | 50 | 75 | 15.53 | 70 | 65 | 24.37 | 85  | 75 | 55  | 0.00 | 0   | 9.10  | 70 | 62.12 | 138   | 2 |
| 713 | 15.23 | 75 | 70 | 13.80 | 55 | 65 | 22.67 | 70  | 75 | 55  | 0.00 | 0   | 8.45  | 65 | 60.14 | 146   | 2 |
| 714 | 15.23 | 80 | 65 | 13.80 | 55 | 65 | 22.67 | 65  | 75 | 60  | 0.00 | 0   | 9.10  | 70 | 60.79 | 155   | 2 |
| 715 | 13.13 | 65 | 60 | 15.53 | 55 | 80 | 14.17 | 60  | 0  | 65  | 0.00 | 0   | 8.45  | 65 | 51.27 | 160   | 1 |
| 716 | 11.55 | 60 | 50 | 16.68 | 65 | 80 | 13.60 | 65  | 0  | 55  | 2.25 | 25  | 6.50  | 50 | 50.58 | 225   | 1 |
| 717 | 16.80 | 80 | 80 | 15.53 | 70 | 65 | 22.10 | 65  | 75 | 55  | 0.00 | 0   | 9.75  | 75 | 64.18 | 270   | 2 |
| 718 | 13.13 | 80 | 45 | 16.10 | 65 | 75 | 22.67 | 70  | 75 | 55  | 2.25 | 25  | 7.80  | 60 | 61.94 | 278   | 2 |
| 719 | 15.23 | 65 | 80 | 13.80 | 55 | 65 | 22.67 | 65  | 75 | 60  | 0.00 | 0   | 9.10  | 70 | 60.79 | 285   | 2 |
| 720 | 17.33 | 85 | 80 | 17.25 | 75 | 75 | 27.20 | 80  | 80 | 80  | 4.50 | 50  | 10.40 | 80 | 76.68 | 1550  | 3 |
| 721 | 12.60 | 60 | 60 | 16.68 | 65 | 80 | 13.03 | 60  | 0  | 55  | 0.00 | 0   | 5.85  | 45 | 48.16 | 32    | 1 |

|     |       |    |    |       |    |    |       |    |    |    |      |    |       |    |       |      |   |
|-----|-------|----|----|-------|----|----|-------|----|----|----|------|----|-------|----|-------|------|---|
| 722 | 12.60 | 65 | 55 | 15.53 | 55 | 80 | 13.60 | 60 | 0  | 60 | 0.00 | 0  | 5.85  | 45 | 47.58 | 38   | 1 |
| 723 | 15.23 | 70 | 75 | 12.65 | 45 | 65 | 15.30 | 65 | 0  | 70 | 0.00 | 0  | 7.15  | 55 | 50.33 | 45   | 1 |
| 724 | 12.60 | 55 | 65 | 12.65 | 45 | 65 | 15.30 | 65 | 0  | 70 | 0.00 | 0  | 8.45  | 65 | 49.00 | 47   | 1 |
| 725 | 12.60 | 70 | 50 | 17.25 | 75 | 75 | 21.53 | 65 | 75 | 50 | 0.00 | 0  | 9.10  | 70 | 60.48 | 55   | 2 |
| 726 | 10.50 | 45 | 55 | 14.95 | 65 | 65 | 11.33 | 65 | 0  | 35 | 0.00 | 0  | 8.45  | 65 | 45.23 | 61   | 1 |
| 727 | 11.55 | 55 | 55 | 15.53 | 70 | 65 | 12.47 | 65 | 0  | 45 | 0.00 | 0  | 7.15  | 55 | 46.69 | 74   | 1 |
| 728 | 9.98  | 60 | 35 | 14.38 | 60 | 65 | 14.17 | 65 | 0  | 60 | 0.00 | 0  | 7.15  | 55 | 45.67 | 80   | 1 |
| 729 | 10.50 | 35 | 65 | 16.10 | 75 | 65 | 18.13 | 75 | 25 | 60 | 2.25 | 25 | 8.45  | 65 | 55.43 | 225  | 1 |
| 730 | 16.28 | 75 | 80 | 14.38 | 60 | 65 | 24.37 | 85 | 75 | 55 | 0.00 | 0  | 9.10  | 70 | 64.12 | 265  | 2 |
| 731 | 11.55 | 65 | 45 | 13.80 | 55 | 65 | 24.93 | 85 | 75 | 60 | 2.25 | 25 | 9.10  | 70 | 61.63 | 460  | 2 |
| 732 | 15.23 | 65 | 80 | 13.80 | 55 | 65 | 24.93 | 85 | 75 | 60 | 2.25 | 25 | 9.75  | 75 | 65.96 | 470  | 2 |
| 733 | 13.13 | 80 | 45 | 13.23 | 50 | 65 | 24.93 | 85 | 75 | 60 | 2.25 | 25 | 9.75  | 75 | 63.28 | 550  | 2 |
| 734 | 16.28 | 75 | 80 | 13.80 | 55 | 65 | 23.23 | 85 | 50 | 70 | 2.25 | 25 | 9.75  | 75 | 65.31 | 680  | 2 |
| 735 | 15.23 | 80 | 65 | 13.23 | 50 | 65 | 22.67 | 85 | 50 | 65 | 4.50 | 50 | 9.10  | 70 | 64.72 | 785  | 2 |
| 736 | 15.75 | 85 | 65 | 13.23 | 50 | 65 | 22.10 | 75 | 50 | 70 | 4.50 | 50 | 9.75  | 75 | 65.33 | 820  | 2 |
| 737 | 16.80 | 80 | 80 | 13.23 | 50 | 65 | 24.93 | 75 | 75 | 70 | 2.25 | 25 | 9.75  | 75 | 66.96 | 865  | 2 |
| 738 | 13.65 | 55 | 75 | 13.23 | 50 | 65 | 25.50 | 75 | 75 | 75 | 2.25 | 25 | 9.75  | 75 | 64.38 | 910  | 2 |
| 739 | 12.60 | 60 | 60 | 15.53 | 65 | 70 | 14.17 | 65 | 0  | 60 | 0.00 | 0  | 8.45  | 65 | 50.74 | 55   | 1 |
| 740 | 17.33 | 85 | 80 | 17.83 | 80 | 75 | 26.63 | 80 | 75 | 80 | 4.50 | 50 | 10.40 | 80 | 76.68 | 1120 | 3 |
| 741 | 15.23 | 65 | 80 | 14.38 | 55 | 70 | 21.53 | 75 | 75 | 40 | 0.00 | 0  | 9.10  | 70 | 60.23 | 130  | 2 |
| 742 | 14.18 | 70 | 65 | 14.95 | 65 | 65 | 11.90 | 70 | 0  | 35 | 0.00 | 0  | 7.80  | 60 | 48.83 | 135  | 1 |
| 743 | 17.33 | 80 | 85 | 13.80 | 55 | 65 | 22.10 | 75 | 75 | 45 | 0.00 | 0  | 9.10  | 70 | 62.33 | 200  | 2 |
| 744 | 15.75 | 80 | 70 | 15.53 | 70 | 65 | 23.80 | 85 | 75 | 50 | 0.00 | 0  | 9.75  | 75 | 64.83 | 210  | 2 |
| 745 | 14.18 | 65 | 70 | 14.95 | 65 | 65 | 23.80 | 85 | 75 | 50 | 0.00 | 0  | 9.10  | 70 | 62.03 | 235  | 2 |
| 746 | 15.75 | 80 | 70 | 14.38 | 60 | 65 | 23.80 | 85 | 75 | 50 | 0.00 | 0  | 9.10  | 70 | 63.03 | 255  | 2 |

|     |       |    |    |       |    |    |       |     |    |     |      |     |       |    |       |       |   |
|-----|-------|----|----|-------|----|----|-------|-----|----|-----|------|-----|-------|----|-------|-------|---|
| 747 | 16.80 | 80 | 80 | 13.80 | 55 | 65 | 24.37 | 85  | 75 | 55  | 0.00 | 0   | 9.10  | 70 | 64.07 | 268   | 2 |
| 748 | 15.75 | 70 | 80 | 13.80 | 55 | 65 | 24.37 | 80  | 75 | 60  | 0.00 | 0   | 9.10  | 70 | 63.02 | 275   | 2 |
| 749 | 12.08 | 60 | 55 | 15.53 | 60 | 75 | 23.80 | 80  | 75 | 55  | 0.00 | 0   | 9.10  | 70 | 60.50 | 280   | 2 |
| 750 | 15.23 | 65 | 80 | 13.80 | 55 | 65 | 23.23 | 80  | 75 | 50  | 0.00 | 0   | 9.10  | 70 | 61.36 | 290   | 2 |
| 751 | 13.65 | 50 | 80 | 12.08 | 40 | 65 | 26.07 | 85  | 75 | 70  | 2.25 | 25  | 9.75  | 75 | 63.79 | 1020  | 2 |
| 752 | 13.65 | 65 | 65 | 13.23 | 50 | 65 | 26.63 | 85  | 75 | 75  | 2.25 | 25  | 10.40 | 80 | 66.16 | 1035  | 2 |
| 753 | 15.75 | 70 | 80 | 16.68 | 70 | 75 | 26.63 | 80  | 75 | 80  | 6.75 | 75  | 10.40 | 80 | 76.21 | 1055  | 3 |
| 754 | 17.33 | 80 | 85 | 16.68 | 70 | 75 | 27.77 | 90  | 75 | 80  | 4.50 | 50  | 10.40 | 80 | 76.67 | 1088  | 3 |
| 755 | 19.95 | 95 | 95 | 19.55 | 85 | 85 | 33.43 | 100 | 95 | 100 | 9.00 | 100 | 12.35 | 95 | 94.28 | 23000 | 4 |
| 756 | 14.18 | 70 | 65 | 13.80 | 60 | 60 | 11.33 | 65  | 0  | 35  | 0.00 | 0   | 7.15  | 55 | 46.46 | 40    | 1 |
| 757 | 12.08 | 60 | 55 | 15.53 | 70 | 65 | 10.77 | 65  | 0  | 30  | 2.25 | 25  | 6.50  | 50 | 47.12 | 45    | 1 |
| 758 | 10.50 | 55 | 45 | 12.65 | 45 | 65 | 11.33 | 55  | 0  | 45  | 0.00 | 0   | 8.45  | 65 | 42.93 | 48    | 1 |
| 759 | 9.98  | 55 | 40 | 14.38 | 55 | 70 | 15.30 | 65  | 0  | 70  | 0.00 | 0   | 8.45  | 65 | 48.10 | 101   | 1 |
| 760 | 13.13 | 60 | 65 | 14.38 | 60 | 65 | 15.30 | 70  | 0  | 65  | 0.00 | 0   | 7.80  | 60 | 50.60 | 136   | 1 |
| 761 | 12.60 | 55 | 65 | 14.95 | 70 | 60 | 14.17 | 65  | 0  | 60  | 0.00 | 0   | 7.15  | 55 | 48.87 | 145   | 1 |
| 762 | 16.80 | 80 | 80 | 13.80 | 55 | 65 | 22.10 | 85  | 75 | 35  | 0.00 | 0   | 9.10  | 70 | 61.80 | 150   | 2 |
| 763 | 9.98  | 65 | 30 | 13.80 | 55 | 65 | 12.47 | 65  | 0  | 45  | 2.25 | 25  | 6.50  | 50 | 44.99 | 155   | 1 |
| 764 | 14.70 | 70 | 70 | 14.95 | 65 | 65 | 13.60 | 55  | 0  | 65  | 0.00 | 0   | 8.45  | 65 | 51.70 | 160   | 1 |
| 765 | 10.50 | 50 | 50 | 12.65 | 45 | 65 | 26.07 | 85  | 75 | 70  | 2.25 | 25  | 9.75  | 75 | 61.22 | 1103  | 2 |
| 766 | 14.70 | 70 | 70 | 14.38 | 60 | 65 | 26.63 | 85  | 75 | 75  | 2.25 | 25  | 9.75  | 75 | 67.71 | 1105  | 2 |
| 767 | 12.60 | 55 | 65 | 12.65 | 50 | 60 | 24.37 | 75  | 70 | 70  | 6.75 | 75  | 10.40 | 80 | 66.77 | 1009  | 2 |
| 768 | 13.65 | 65 | 65 | 18.40 | 85 | 75 | 26.63 | 80  | 75 | 80  | 9.00 | 100 | 10.40 | 80 | 78.08 | 1020  | 3 |
| 769 | 17.33 | 80 | 85 | 16.10 | 65 | 75 | 26.63 | 80  | 75 | 80  | 4.50 | 50  | 10.40 | 80 | 74.96 | 1055  | 3 |
| 770 | 16.28 | 75 | 80 | 17.25 | 75 | 75 | 27.20 | 85  | 75 | 80  | 6.75 | 75  | 9.10  | 70 | 76.58 | 1065  | 3 |
| 771 | 16.49 | 82 | 75 | 16.68 | 70 | 75 | 26.63 | 80  | 75 | 80  | 6.75 | 75  | 9.10  | 70 | 75.64 | 1070  | 3 |

|     |       |    |    |       |    |    |       |     |    |     |      |     |       |    |       |       |   |
|-----|-------|----|----|-------|----|----|-------|-----|----|-----|------|-----|-------|----|-------|-------|---|
| 772 | 17.85 | 80 | 90 | 18.40 | 85 | 75 | 27.77 | 90  | 75 | 80  | 2.25 | 25  | 9.75  | 75 | 76.02 | 1175  | 3 |
| 773 | 19.95 | 95 | 95 | 20.70 | 85 | 95 | 33.43 | 100 | 95 | 100 | 9.00 | 100 | 12.35 | 95 | 95.43 | 12000 | 4 |
