# Supplementary material for: Empirical analysis of pig welfare levels and their impact on pig breeding efficiency—Based on 773 pig farmers’ survey data
Source: PubMed Central journal article supplement (PMC5744959; doi:10.1371/journal.pone.0190108), 2017-12-27
Supplement: pone.0190108.s003.pdf [file pone.0190108.s003.pdf]

### S3: Average input and output of the 773 pig farmers every year for each pig

| Sample No. | Farm Scale(head/farm) | output value of pig (rmb/head) | young piglet cost (rmb/head) | feed costs (rmb/head) | Labour costs (rmb/head) | epidemic                   |                          |                        |                        | Total input (rmb/head) |
|------------|-----------------------|--------------------------------|------------------------------|-----------------------|-------------------------|----------------------------|--------------------------|------------------------|------------------------|------------------------|
|            |                       |                                |                              |                       |                         | prevention cost (rmb/head) | death penalty (rmb/head) | power costs (rmb/head) | other costs (rmb/head) |                        |
| 1          | 42                    | 1779.11                        | 563.84                       | 939.19                | 106.30                  | 3.85                       | 12.27                    | 4.88                   | 11.86                  | 1642.19                |
| 2          | 75                    | 1768.36                        | 564.01                       | 926.04                | 119.06                  | 3.90                       | 12.13                    | 4.68                   | 12.11                  | 1641.93                |
| 3          | 78                    | 1771.31                        | 564.35                       | 915.15                | 119.16                  | 3.94                       | 12.09                    | 4.69                   | 11.84                  | 1631.22                |
| 4          | 89                    | 1781.15                        | 564.44                       | 913.12                | 119.33                  | 3.98                       | 12.42                    | 4.82                   | 12.26                  | 1630.37                |
| 5          | 91                    | 1768.71                        | 564.80                       | 913.00                | 119.60                  | 4.03                       | 11.96                    | 5.06                   | 12.29                  | 1630.74                |
| 6          | 334                   | 1782.28                        | 565.07                       | 913.09                | 119.68                  | 4.10                       | 13.91                    | 5.18                   | 12.42                  | 1633.45                |
| 7          | 446                   | 1766.55                        | 564.84                       | 894.57                | 119.89                  | 4.44                       | 10.67                    | 4.98                   | 12.50                  | 1611.89                |
| 8          | 532                   | 1770.66                        | 564.95                       | 915.22                | 119.94                  | 4.69                       | 10.00                    | 4.89                   | 12.73                  | 1632.42                |
| 9          | 641                   | 1773.81                        | 510.99                       | 890.97                | 173.50                  | 19.08                      | 8.81                     | 6.38                   | 16.78                  | 1626.51                |
| 10         | 783                   | 1782.28                        | 510.86                       | 892.81                | 173.54                  | 19.30                      | 11.70                    | 6.51                   | 17.13                  | 1631.85                |
| 11         | 806                   | 1777.59                        | 510.45                       | 903.64                | 173.83                  | 19.46                      | 13.97                    | 6.83                   | 17.21                  | 1645.39                |
| 12         | 1269                  | 1708.68                        | 506.97                       | 833.67                | 173.92                  | 19.81                      | 12.85                    | 6.85                   | 17.30                  | 1571.37                |
| 13         | 1341                  | 1696.91                        | 506.08                       | 807.75                | 174.26                  | 20.22                      | 12.13                    | 6.96                   | 17.79                  | 1545.19                |
| 14         | 1555                  | 1761.54                        | 505.74                       | 892.13                | 174.39                  | 20.35                      | 12.28                    | 6.17                   | 17.98                  | 1629.04                |
| 15         | 1603                  | 1738.35                        | 505.53                       | 863.44                | 174.55                  | 20.63                      | 8.86                     | 6.69                   | 18.15                  | 1597.85                |
| 16         | 1776                  | 1757.59                        | 505.39                       | 870.89                | 174.82                  | 20.84                      | 12.79                    | 6.76                   | 18.31                  | 1609.80                |
| 17         | 1897                  | 1741.32                        | 504.51                       | 865.23                | 175.17                  | 21.02                      | 9.62                     | 6.09                   | 18.39                  | 1600.03                |

|    |      |         |        |        |        |       |       |      |       |         |
|----|------|---------|--------|--------|--------|-------|-------|------|-------|---------|
| 18 | 2367 | 1750.40 | 504.29 | 873.14 | 176.09 | 21.20 | 11.27 | 5.81 | 18.50 | 1610.30 |
| 19 | 38   | 1774.68 | 566.23 | 909.91 | 119.56 | 3.71  | 12.12 | 4.76 | 12.06 | 1628.35 |
| 20 | 67   | 1760.25 | 567.05 | 892.94 | 119.72 | 4.89  | 11.98 | 4.38 | 12.09 | 1613.05 |
| 21 | 75   | 1765.61 | 567.39 | 901.56 | 119.96 | 4.40  | 12.42 | 3.95 | 12.05 | 1621.73 |
| 22 | 82   | 1771.38 | 567.61 | 904.99 | 120.07 | 4.31  | 12.48 | 3.39 | 12.20 | 1625.05 |
| 23 | 128  | 1756.65 | 567.78 | 896.01 | 120.12 | 4.65  | 12.19 | 5.47 | 12.74 | 1618.96 |
| 24 | 245  | 1737.61 | 568.06 | 879.23 | 120.27 | 4.34  | 10.73 | 4.92 | 12.92 | 1600.47 |
| 25 | 467  | 1744.36 | 568.54 | 871.53 | 120.35 | 4.19  | 11.79 | 5.41 | 13.01 | 1594.82 |
| 26 | 523  | 1741.62 | 568.70 | 862.01 | 121.14 | 4.52  | 12.57 | 5.56 | 11.59 | 1586.09 |
| 27 | 655  | 1748.34 | 509.06 | 865.27 | 170.56 | 18.52 | 11.98 | 6.68 | 16.50 | 1598.57 |
| 28 | 860  | 1756.54 | 508.49 | 889.83 | 173.35 | 18.70 | 10.71 | 6.26 | 16.81 | 1624.15 |
| 29 | 1120 | 1718.58 | 506.47 | 831.78 | 175.13 | 19.03 | 10.33 | 6.53 | 16.90 | 1566.17 |
| 30 | 1185 | 1683.26 | 507.00 | 814.49 | 175.25 | 19.45 | 12.96 | 6.08 | 16.99 | 1552.22 |
| 31 | 1240 | 1708.54 | 506.84 | 836.07 | 175.33 | 20.28 | 12.29 | 6.26 | 17.24 | 1574.31 |
| 32 | 1420 | 1694.72 | 507.56 | 805.82 | 175.46 | 21.03 | 12.59 | 6.68 | 17.32 | 1546.46 |
| 33 | 1450 | 1691.61 | 507.74 | 805.56 | 175.59 | 21.40 | 12.20 | 6.97 | 17.35 | 1546.81 |
| 34 | 35   | 1771.58 | 563.97 | 912.72 | 102.58 | 2.31  | 12.28 | 3.52 | 8.82  | 1606.20 |
| 35 | 40   | 1757.66 | 564.46 | 923.37 | 105.89 | 3.16  | 12.36 | 3.99 | 10.11 | 1623.34 |
| 36 | 43   | 1764.44 | 564.85 | 928.01 | 106.33 | 3.70  | 10.79 | 3.19 | 10.44 | 1627.31 |
| 37 | 51   | 1763.81 | 565.09 | 927.97 | 106.55 | 3.79  | 9.68  | 4.28 | 11.20 | 1628.56 |
| 38 | 56   | 1760.39 | 565.36 | 909.47 | 106.77 | 3.91  | 13.00 | 4.56 | 11.41 | 1614.48 |
| 39 | 68   | 1750.28 | 565.58 | 911.66 | 106.90 | 4.19  | 12.11 | 4.79 | 12.08 | 1617.31 |
| 40 | 70   | 1755.57 | 565.80 | 913.94 | 107.55 | 4.44  | 10.73 | 4.92 | 12.26 | 1619.64 |
| 41 | 76   | 1763.45 | 566.14 | 913.06 | 107.83 | 4.52  | 12.91 | 5.07 | 12.79 | 1622.32 |
| 42 | 85   | 1748.37 | 566.49 | 905.03 | 108.26 | 4.60  | 12.06 | 5.26 | 13.20 | 1614.90 |

|    |      |         |        |        |        |       |       |      |       |         |
|----|------|---------|--------|--------|--------|-------|-------|------|-------|---------|
| 43 | 110  | 1741.98 | 566.65 | 909.74 | 108.49 | 4.71  | 12.17 | 5.38 | 13.34 | 1620.48 |
| 44 | 325  | 1728.91 | 566.86 | 892.21 | 108.74 | 4.85  | 12.50 | 5.49 | 13.39 | 1604.04 |
| 45 | 480  | 1723.46 | 566.99 | 882.81 | 109.53 | 5.31  | 9.62  | 5.71 | 13.49 | 1593.46 |
| 46 | 550  | 1721.75 | 567.04 | 880.56 | 110.30 | 5.38  | 12.26 | 5.79 | 13.64 | 1594.97 |
| 47 | 620  | 1718.61 | 507.74 | 853.41 | 179.57 | 14.89 | 12.35 | 6.37 | 15.11 | 1589.44 |
| 48 | 890  | 1705.24 | 507.43 | 829.19 | 181.73 | 16.26 | 12.20 | 6.55 | 15.45 | 1568.81 |
| 49 | 4200 | 1661.48 | 504.85 | 773.75 | 186.24 | 19.70 | 10.82 | 7.12 | 17.10 | 1519.58 |
| 50 | 6600 | 1584.74 | 503.56 | 694.46 | 187.76 | 20.02 | 12.87 | 7.29 | 17.69 | 1443.65 |
| 51 | 45   | 1737.36 | 560.43 | 876.22 | 123.96 | 6.39  | 12.12 | 4.45 | 8.99  | 1592.56 |
| 52 | 48   | 1726.87 | 560.60 | 872.75 | 124.48 | 6.49  | 11.67 | 4.01 | 9.92  | 1589.92 |
| 53 | 55   | 1741.28 | 561.35 | 884.97 | 126.07 | 6.68  | 11.19 | 5.67 | 10.24 | 1606.17 |
| 54 | 56   | 1760.41 | 561.49 | 899.16 | 127.56 | 7.22  | 12.33 | 4.38 | 10.39 | 1622.53 |
| 55 | 69   | 1729.49 | 561.61 | 861.83 | 131.75 | 7.30  | 12.18 | 3.12 | 9.46  | 1587.25 |
| 56 | 78   | 1740.95 | 562.00 | 863.21 | 134.19 | 7.81  | 11.06 | 7.26 | 9.54  | 1595.07 |
| 57 | 79   | 1721.38 | 562.44 | 845.88 | 134.48 | 8.04  | 9.65  | 6.28 | 9.82  | 1576.59 |
| 58 | 86   | 1740.28 | 562.76 | 870.44 | 134.63 | 8.40  | 12.21 | 5.59 | 13.14 | 1607.17 |
| 59 | 310  | 1743.29 | 553.63 | 867.25 | 140.53 | 8.51  | 12.29 | 5.96 | 12.86 | 1601.03 |
| 60 | 460  | 1725.88 | 537.38 | 864.56 | 143.92 | 9.09  | 12.79 | 6.42 | 13.61 | 1587.77 |
| 61 | 540  | 1740.40 | 528.26 | 866.81 | 146.34 | 10.00 | 12.85 | 6.47 | 12.41 | 1583.14 |
| 62 | 680  | 1726.37 | 509.09 | 861.07 | 157.77 | 15.95 | 12.28 | 6.66 | 15.83 | 1578.65 |
| 63 | 830  | 1705.24 | 501.74 | 834.59 | 170.30 | 16.81 | 12.51 | 6.85 | 16.78 | 1559.58 |
| 64 | 5500 | 1659.72 | 497.94 | 785.05 | 179.39 | 18.02 | 12.43 | 6.75 | 17.74 | 1517.32 |
| 65 | 45   | 1727.37 | 553.09 | 883.63 | 117.33 | 6.78  | 10.67 | 3.97 | 10.69 | 1586.16 |
| 66 | 55   | 1734.20 | 552.47 | 880.44 | 117.46 | 6.90  | 12.39 | 4.43 | 10.93 | 1585.02 |
| 67 | 58   | 1737.86 | 551.88 | 882.38 | 117.70 | 7.02  | 11.68 | 5.49 | 11.42 | 1587.57 |

|    |      |         |        |        |        |       |       |      |       |         |
|----|------|---------|--------|--------|--------|-------|-------|------|-------|---------|
| 68 | 64   | 1715.62 | 551.80 | 861.79 | 117.88 | 7.19  | 11.28 | 5.88 | 12.84 | 1568.66 |
| 69 | 66   | 1724.70 | 551.45 | 872.40 | 117.95 | 7.26  | 12.49 | 5.69 | 12.10 | 1579.34 |
| 70 | 72   | 1754.34 | 551.36 | 905.96 | 118.02 | 7.30  | 12.38 | 5.85 | 11.56 | 1612.43 |
| 71 | 78   | 1741.19 | 551.11 | 898.83 | 118.46 | 7.43  | 11.82 | 6.02 | 12.38 | 1606.05 |
| 72 | 80   | 1724.11 | 550.94 | 879.83 | 118.69 | 7.52  | 12.70 | 6.07 | 9.59  | 1585.34 |
| 73 | 93   | 1700.36 | 550.63 | 851.16 | 120.37 | 7.64  | 10.01 | 6.09 | 11.24 | 1557.14 |
| 74 | 206  | 1717.68 | 531.46 | 871.48 | 126.59 | 11.85 | 11.88 | 6.12 | 13.20 | 1572.58 |
| 75 | 334  | 1682.67 | 523.99 | 836.75 | 131.90 | 12.24 | 11.28 | 6.26 | 13.36 | 1535.78 |
| 76 | 455  | 1674.39 | 517.56 | 840.95 | 137.56 | 13.09 | 12.23 | 6.28 | 13.39 | 1541.06 |
| 77 | 582  | 1671.50 | 506.96 | 829.89 | 152.90 | 16.09 | 10.92 | 7.09 | 13.99 | 1537.84 |
| 78 | 627  | 1660.39 | 505.77 | 805.82 | 157.44 | 16.88 | 12.09 | 7.78 | 18.44 | 1524.22 |
| 79 | 768  | 1654.77 | 503.50 | 806.23 | 165.19 | 17.33 | 12.70 | 8.37 | 17.11 | 1530.43 |
| 80 | 850  | 1657.64 | 501.81 | 803.05 | 171.55 | 17.39 | 11.19 | 7.91 | 17.72 | 1530.62 |
| 81 | 7500 | 1648.38 | 496.55 | 782.43 | 183.96 | 17.82 | 12.16 | 6.17 | 18.19 | 1517.28 |
| 82 | 38   | 1772.90 | 550.19 | 926.51 | 120.85 | 7.14  | 12.26 | 2.56 | 8.52  | 1628.03 |
| 83 | 48   | 1760.67 | 553.94 | 908.71 | 120.37 | 7.52  | 12.00 | 3.53 | 8.81  | 1614.88 |
| 84 | 60   | 1741.58 | 546.07 | 890.66 | 121.72 | 7.69  | 12.18 | 3.29 | 8.95  | 1590.56 |
| 85 | 80   | 1743.39 | 544.88 | 897.42 | 122.14 | 7.82  | 11.83 | 3.67 | 9.84  | 1597.60 |
| 86 | 85   | 1737.41 | 544.46 | 893.19 | 122.45 | 7.93  | 11.29 | 3.86 | 9.99  | 1593.17 |
| 87 | 85   | 1751.24 | 537.97 | 911.53 | 116.60 | 8.05  | 12.78 | 4.09 | 10.89 | 1601.91 |
| 88 | 91   | 1740.57 | 534.83 | 908.71 | 117.85 | 8.14  | 11.03 | 4.18 | 10.99 | 1595.73 |
| 89 | 220  | 1727.47 | 532.74 | 900.27 | 118.42 | 8.74  | 9.65  | 4.38 | 13.14 | 1587.34 |
| 90 | 240  | 1730.66 | 531.61 | 898.12 | 118.96 | 9.02  | 13.17 | 4.52 | 13.43 | 1588.83 |
| 91 | 320  | 1732.35 | 531.09 | 900.56 | 119.27 | 9.26  | 12.28 | 4.65 | 13.70 | 1590.81 |
| 92 | 470  | 1728.52 | 529.45 | 897.57 | 120.25 | 9.39  | 12.06 | 4.81 | 14.06 | 1587.59 |

|     |       |         |        |        |        |       |       |      |       |         |
|-----|-------|---------|--------|--------|--------|-------|-------|------|-------|---------|
| 93  | 530   | 1724.44 | 518.07 | 881.14 | 137.34 | 12.90 | 12.01 | 5.96 | 14.22 | 1581.64 |
| 94  | 860   | 1727.29 | 504.49 | 895.28 | 146.96 | 14.19 | 12.61 | 6.59 | 14.91 | 1595.03 |
| 95  | 1350  | 1714.39 | 502.60 | 871.61 | 159.89 | 15.79 | 11.33 | 6.27 | 15.80 | 1583.29 |
| 96  | 1470  | 1710.19 | 501.78 | 863.97 | 160.08 | 15.95 | 11.79 | 6.23 | 16.42 | 1576.22 |
| 97  | 1620  | 1694.65 | 498.43 | 847.40 | 163.43 | 16.43 | 11.20 | 6.36 | 16.72 | 1559.97 |
| 98  | 1850  | 1690.87 | 496.88 | 847.61 | 164.28 | 16.69 | 12.18 | 6.52 | 17.54 | 1561.70 |
| 99  | 40    | 1741.53 | 562.93 | 868.85 | 125.89 | 4.95  | 10.96 | 5.03 | 11.03 | 1589.64 |
| 100 | 55    | 1744.16 | 561.73 | 873.94 | 126.24 | 5.02  | 10.31 | 5.05 | 11.44 | 1593.73 |
| 101 | 75    | 1740.59 | 560.65 | 865.63 | 126.86 | 5.33  | 12.39 | 5.38 | 12.11 | 1588.35 |
| 102 | 160   | 1735.36 | 559.49 | 864.11 | 129.66 | 5.46  | 11.82 | 5.67 | 12.19 | 1588.40 |
| 103 | 280   | 1731.74 | 558.90 | 857.08 | 133.78 | 6.40  | 12.58 | 5.76 | 12.45 | 1586.95 |
| 104 | 340   | 1727.30 | 537.38 | 875.33 | 136.26 | 6.86  | 11.26 | 6.01 | 12.82 | 1585.92 |
| 105 | 460   | 1720.96 | 529.60 | 873.78 | 138.63 | 7.74  | 10.01 | 6.08 | 13.36 | 1579.20 |
| 106 | 530   | 1725.27 | 526.45 | 873.69 | 142.49 | 8.85  | 12.09 | 6.29 | 13.88 | 1583.74 |
| 107 | 620   | 1715.38 | 514.09 | 868.51 | 146.34 | 12.10 | 12.42 | 6.37 | 15.01 | 1574.84 |
| 108 | 750   | 1722.24 | 510.49 | 876.86 | 147.47 | 12.69 | 11.98 | 6.42 | 15.44 | 1581.35 |
| 109 | 1050  | 1686.72 | 505.60 | 849.27 | 153.98 | 14.44 | 10.77 | 6.82 | 15.50 | 1556.38 |
| 110 | 1100  | 1692.19 | 502.48 | 855.30 | 154.25 | 14.49 | 12.01 | 6.99 | 15.55 | 1561.07 |
| 111 | 1400  | 1694.41 | 501.53 | 853.56 | 154.39 | 14.80 | 12.68 | 7.06 | 15.83 | 1559.85 |
| 112 | 1700  | 1703.06 | 500.74 | 864.23 | 154.90 | 15.14 | 12.12 | 7.11 | 16.02 | 1570.26 |
| 113 | 1750  | 1678.84 | 499.43 | 827.14 | 155.04 | 15.18 | 11.96 | 7.13 | 16.38 | 1532.26 |
| 114 | 1820  | 1698.55 | 498.75 | 858.85 | 157.48 | 15.52 | 10.87 | 7.27 | 16.55 | 1565.29 |
| 115 | 2100  | 1672.30 | 497.83 | 833.22 | 158.55 | 16.00 | 12.52 | 7.35 | 16.72 | 1542.19 |
| 116 | 32000 | 1660.01 | 492.77 | 823.99 | 163.40 | 16.26 | 12.19 | 7.48 | 16.91 | 1533.00 |
| 117 | 35    | 1761.38 | 541.57 | 937.43 | 113.16 | 3.91  | 11.99 | 4.32 | 12.24 | 1624.62 |

|     |      |         |        |        |        |       |       |      |       |         |
|-----|------|---------|--------|--------|--------|-------|-------|------|-------|---------|
| 118 | 38   | 1750.25 | 541.69 | 930.05 | 114.48 | 3.99  | 12.08 | 4.36 | 12.36 | 1619.01 |
| 119 | 50   | 1757.67 | 542.43 | 932.85 | 115.03 | 4.25  | 11.47 | 4.43 | 12.41 | 1622.87 |
| 120 | 62   | 1755.65 | 541.17 | 923.61 | 115.50 | 4.31  | 12.29 | 4.46 | 12.45 | 1613.79 |
| 121 | 68   | 1757.50 | 540.64 | 927.59 | 115.86 | 4.38  | 11.92 | 4.58 | 12.46 | 1617.43 |
| 122 | 75   | 1751.58 | 540.10 | 924.64 | 116.24 | 4.43  | 11.98 | 4.67 | 11.74 | 1613.80 |
| 123 | 85   | 1748.37 | 539.44 | 923.14 | 116.92 | 4.48  | 11.86 | 4.81 | 12.55 | 1613.20 |
| 124 | 245  | 1744.57 | 538.68 | 920.69 | 117.28 | 4.80  | 11.09 | 5.38 | 13.39 | 1611.31 |
| 125 | 352  | 1736.67 | 538.36 | 909.32 | 118.15 | 4.88  | 12.27 | 5.87 | 13.62 | 1602.47 |
| 126 | 468  | 1735.17 | 526.36 | 911.05 | 119.24 | 5.12  | 11.98 | 6.03 | 14.51 | 1594.29 |
| 127 | 577  | 1724.92 | 517.69 | 914.33 | 120.09 | 5.35  | 12.16 | 6.19 | 14.92 | 1590.73 |
| 128 | 693  | 1718.77 | 494.87 | 874.01 | 173.26 | 15.04 | 11.50 | 6.56 | 16.13 | 1591.37 |
| 129 | 707  | 1725.25 | 493.94 | 877.53 | 174.50 | 13.80 | 11.82 | 6.69 | 16.66 | 1594.94 |
| 130 | 736  | 1714.91 | 491.81 | 861.32 | 175.94 | 15.12 | 12.55 | 6.77 | 16.71 | 1580.22 |
| 131 | 752  | 1708.82 | 491.57 | 856.29 | 177.08 | 14.75 | 9.80  | 6.82 | 16.75 | 1573.06 |
| 132 | 780  | 1720.35 | 491.37 | 865.85 | 178.13 | 16.09 | 11.99 | 6.88 | 16.78 | 1587.09 |
| 133 | 860  | 1703.68 | 491.24 | 847.81 | 179.07 | 16.76 | 11.89 | 6.99 | 17.12 | 1570.88 |
| 134 | 3750 | 1675.45 | 487.00 | 829.42 | 180.09 | 16.23 | 11.52 | 7.26 | 17.35 | 1548.87 |
| 135 | 32   | 1763.37 | 535.17 | 936.79 | 115.94 | 3.78  | 11.88 | 4.61 | 11.77 | 1619.94 |
| 136 | 38   | 1760.89 | 534.00 | 933.93 | 117.15 | 3.61  | 12.65 | 4.66 | 11.95 | 1617.95 |
| 137 | 46   | 1757.91 | 533.56 | 935.07 | 117.48 | 3.54  | 9.02  | 4.75 | 12.26 | 1615.68 |
| 138 | 47   | 1753.67 | 533.33 | 929.33 | 118.07 | 3.90  | 9.75  | 4.81 | 12.68 | 1611.87 |
| 139 | 60   | 1748.95 | 532.90 | 922.19 | 119.26 | 4.22  | 10.93 | 4.83 | 12.73 | 1607.06 |
| 140 | 65   | 1746.34 | 532.68 | 917.13 | 120.35 | 4.29  | 11.69 | 4.87 | 12.86 | 1603.87 |
| 141 | 83   | 1740.88 | 530.64 | 914.23 | 120.96 | 4.35  | 11.19 | 4.89 | 13.25 | 1599.51 |
| 142 | 180  | 1734.47 | 527.86 | 906.59 | 122.30 | 4.40  | 11.72 | 5.49 | 14.69 | 1593.05 |

|     |      |         |        |        |        |       |       |      |       |         |
|-----|------|---------|--------|--------|--------|-------|-------|------|-------|---------|
| 143 | 240  | 1730.26 | 527.49 | 906.42 | 124.42 | 4.69  | 12.78 | 5.61 | 14.75 | 1596.16 |
| 144 | 260  | 1728.38 | 526.71 | 904.08 | 125.04 | 4.92  | 12.08 | 5.66 | 14.77 | 1593.26 |
| 145 | 370  | 1726.69 | 524.78 | 903.47 | 126.12 | 5.03  | 11.93 | 5.82 | 15.15 | 1592.30 |
| 146 | 450  | 1724.12 | 513.09 | 909.39 | 127.25 | 5.46  | 11.70 | 5.91 | 15.48 | 1588.28 |
| 147 | 780  | 1721.16 | 496.94 | 869.58 | 170.16 | 15.31 | 11.57 | 6.26 | 16.03 | 1585.85 |
| 148 | 1150 | 1695.25 | 495.55 | 848.72 | 170.47 | 15.46 | 11.99 | 6.53 | 16.56 | 1565.28 |
| 149 | 1250 | 1699.00 | 495.43 | 852.76 | 171.97 | 15.62 | 11.52 | 6.56 | 16.61 | 1570.47 |
| 150 | 1850 | 1703.48 | 492.79 | 853.10 | 173.23 | 15.98 | 13.45 | 6.99 | 16.72 | 1572.26 |
| 151 | 2100 | 1704.49 | 492.60 | 854.56 | 174.49 | 16.25 | 12.80 | 7.08 | 16.75 | 1574.53 |
| 152 | 2250 | 1713.35 | 491.73 | 864.43 | 178.14 | 16.39 | 12.05 | 7.22 | 17.08 | 1587.04 |
| 153 | 50   | 1760.98 | 539.85 | 926.46 | 122.86 | 3.54  | 11.19 | 4.47 | 10.75 | 1619.12 |
| 154 | 55   | 1763.27 | 541.39 | 925.38 | 124.25 | 3.92  | 10.82 | 4.52 | 11.15 | 1621.43 |
| 155 | 65   | 1772.24 | 541.10 | 934.23 | 125.26 | 4.31  | 9.70  | 4.55 | 11.21 | 1630.36 |
| 156 | 78   | 1737.29 | 540.46 | 896.00 | 125.95 | 4.39  | 12.08 | 4.73 | 11.48 | 1595.09 |
| 157 | 120  | 1749.70 | 540.17 | 905.90 | 127.02 | 4.70  | 11.50 | 5.28 | 12.34 | 1606.91 |
| 158 | 125  | 1743.45 | 539.49 | 896.36 | 129.95 | 4.85  | 12.18 | 5.39 | 12.42 | 1600.64 |
| 159 | 135  | 1737.52 | 539.87 | 889.58 | 132.18 | 5.02  | 11.83 | 5.42 | 12.55 | 1596.45 |
| 160 | 140  | 1741.16 | 539.27 | 892.82 | 134.45 | 5.24  | 11.29 | 5.51 | 12.64 | 1601.22 |
| 161 | 160  | 1740.57 | 536.96 | 895.79 | 134.80 | 5.35  | 12.78 | 5.56 | 12.72 | 1603.96 |
| 162 | 290  | 1738.41 | 536.50 | 892.11 | 136.45 | 5.40  | 11.03 | 5.79 | 13.45 | 1600.73 |
| 163 | 1300 | 1737.87 | 504.80 | 889.01 | 163.56 | 14.16 | 9.65  | 6.27 | 15.18 | 1602.63 |
| 164 | 1450 | 1734.28 | 501.49 | 875.99 | 171.07 | 15.05 | 13.17 | 6.35 | 15.53 | 1598.65 |
| 165 | 1480 | 1731.46 | 497.35 | 877.22 | 173.42 | 15.81 | 12.28 | 6.46 | 15.65 | 1598.19 |
| 166 | 1520 | 1730.81 | 496.87 | 873.66 | 176.00 | 15.96 | 12.06 | 6.62 | 15.72 | 1596.89 |
| 167 | 1680 | 1727.44 | 495.49 | 868.79 | 176.90 | 16.45 | 12.01 | 6.68 | 15.86 | 1592.18 |

|     |      |         |        |        |        |       |       |      |       |         |
|-----|------|---------|--------|--------|--------|-------|-------|------|-------|---------|
| 168 | 2200 | 1724.66 | 492.44 | 864.90 | 178.13 | 16.70 | 12.61 | 7.03 | 16.75 | 1588.56 |
| 169 | 32   | 1751.90 | 540.16 | 918.80 | 118.08 | 3.69  | 11.33 | 4.43 | 10.29 | 1606.78 |
| 170 | 40   | 1758.55 | 539.57 | 923.70 | 118.97 | 3.74  | 11.79 | 4.48 | 10.52 | 1612.77 |
| 171 | 45   | 1741.42 | 548.29 | 898.61 | 119.46 | 4.19  | 11.20 | 4.52 | 10.93 | 1597.20 |
| 172 | 51   | 1747.44 | 549.04 | 902.41 | 120.53 | 4.46  | 12.18 | 4.57 | 11.15 | 1604.34 |
| 173 | 55   | 1718.85 | 549.18 | 880.67 | 120.69 | 4.48  | 10.96 | 4.61 | 11.34 | 1581.93 |
| 174 | 72   | 1738.86 | 549.30 | 896.32 | 121.09 | 4.50  | 10.31 | 4.72 | 11.38 | 1597.62 |
| 175 | 85   | 1730.29 | 484.24 | 950.27 | 122.16 | 4.56  | 12.39 | 4.83 | 11.66 | 1590.11 |
| 176 | 253  | 1727.47 | 530.67 | 901.79 | 123.04 | 4.91  | 11.82 | 5.52 | 12.35 | 1590.10 |
| 177 | 327  | 1729.84 | 528.87 | 903.65 | 125.43 | 5.13  | 10.52 | 5.66 | 12.47 | 1591.73 |
| 178 | 336  | 1731.45 | 529.09 | 903.73 | 126.25 | 5.24  | 11.26 | 5.85 | 12.53 | 1593.95 |
| 179 | 345  | 1730.66 | 539.84 | 888.97 | 126.93 | 5.29  | 10.01 | 5.89 | 12.65 | 1589.58 |
| 180 | 405  | 1727.69 | 540.11 | 887.55 | 128.15 | 5.45  | 12.87 | 5.98 | 12.92 | 1593.03 |
| 181 | 425  | 1722.17 | 540.66 | 879.29 | 128.94 | 5.48  | 12.12 | 6.06 | 13.48 | 1586.03 |
| 182 | 580  | 1718.90 | 539.36 | 841.18 | 132.32 | 5.52  | 44.91 | 6.17 | 14.63 | 1584.09 |
| 183 | 610  | 1716.38 | 505.61 | 857.97 | 167.43 | 13.82 | 11.19 | 6.69 | 15.54 | 1578.25 |
| 184 | 735  | 1722.45 | 503.34 | 862.76 | 170.15 | 14.25 | 12.33 | 6.72 | 15.71 | 1585.26 |
| 185 | 780  | 1733.34 | 501.65 | 872.32 | 174.09 | 14.74 | 12.18 | 6.76 | 15.94 | 1597.68 |
| 186 | 3500 | 1710.52 | 496.39 | 850.37 | 181.16 | 17.00 | 11.62 | 7.27 | 16.91 | 1580.72 |
| 187 | 38   | 1782.58 | 549.94 | 933.15 | 115.16 | 3.44  | 12.03 | 4.37 | 10.27 | 1628.36 |
| 188 | 40   | 1793.37 | 549.35 | 940.42 | 118.97 | 3.49  | 12.08 | 4.43 | 10.65 | 1639.39 |
| 189 | 45   | 1781.68 | 558.07 | 918.65 | 120.45 | 3.81  | 11.86 | 4.47 | 11.04 | 1628.35 |
| 190 | 56   | 1772.29 | 558.82 | 907.11 | 121.17 | 3.96  | 11.98 | 4.51 | 11.16 | 1618.71 |
| 191 | 62   | 1770.81 | 558.96 | 903.32 | 122.48 | 4.05  | 11.63 | 4.56 | 11.25 | 1616.25 |
| 192 | 68   | 1773.48 | 559.08 | 905.12 | 122.85 | 4.14  | 12.78 | 4.67 | 11.53 | 1620.17 |



|     |      |         |        |        |        |       |       |      |       |         |
|-----|------|---------|--------|--------|--------|-------|-------|------|-------|---------|
| 193 | 74   | 1773.67 | 494.02 | 969.39 | 125.00 | 4.25  | 12.11 | 4.02 | 11.65 | 1620.44 |
| 194 | 81   | 1770.47 | 523.17 | 935.60 | 126.02 | 4.30  | 12.65 | 4.76 | 11.73 | 1618.23 |
| 195 | 85   | 1771.38 | 522.48 | 938.33 | 126.96 | 4.39  | 11.63 | 4.85 | 11.78 | 1620.42 |
| 196 | 355  | 1751.31 | 522.05 | 920.71 | 128.15 | 4.81  | 9.78  | 5.42 | 13.03 | 1603.95 |
| 197 | 450  | 1753.29 | 521.63 | 923.61 | 130.33 | 5.05  | 8.58  | 5.57 | 13.48 | 1608.25 |
| 198 | 460  | 1760.37 | 521.44 | 927.26 | 131.22 | 5.35  | 11.92 | 5.63 | 13.62 | 1616.44 |
| 199 | 556  | 1753.28 | 516.96 | 923.76 | 131.93 | 5.46  | 11.98 | 5.81 | 14.97 | 1610.87 |
| 200 | 580  | 1747.90 | 510.86 | 878.64 | 168.43 | 14.04 | 11.52 | 6.09 | 15.52 | 1605.10 |
| 201 | 665  | 1752.72 | 507.38 | 884.74 | 168.84 | 14.40 | 13.45 | 6.41 | 15.69 | 1610.91 |
| 202 | 775  | 1754.48 | 506.49 | 883.73 | 173.07 | 14.85 | 12.80 | 6.55 | 15.85 | 1613.34 |
| 203 | 880  | 1757.42 | 504.92 | 888.05 | 174.05 | 15.32 | 12.05 | 6.79 | 16.32 | 1617.50 |
| 204 | 3100 | 1739.75 | 497.13 | 877.34 | 177.30 | 16.68 | 11.19 | 7.37 | 16.91 | 1603.92 |
| 205 | 41   | 1767.68 | 560.67 | 614.13 | 118.75 | 3.61  | 10.82 | 3.99 | 9.13  | 1321.10 |
| 206 | 45   | 1773.35 | 551.79 | 928.83 | 119.29 | 3.69  | 9.70  | 4.08 | 10.05 | 1627.43 |
| 207 | 58   | 1771.46 | 560.81 | 915.07 | 120.14 | 3.78  | 12.08 | 4.25 | 10.34 | 1626.47 |
| 208 | 65   | 1780.90 | 560.93 | 923.78 | 121.09 | 3.95  | 11.50 | 4.46 | 10.43 | 1636.14 |
| 209 | 80   | 1782.29 | 495.87 | 989.37 | 122.00 | 3.98  | 12.18 | 4.59 | 10.67 | 1638.66 |
| 210 | 81   | 1776.48 | 551.20 | 927.71 | 122.32 | 4.25  | 11.83 | 4.62 | 10.72 | 1632.65 |
| 211 | 85   | 1767.39 | 559.68 | 909.35 | 123.06 | 4.35  | 11.29 | 4.66 | 10.78 | 1623.17 |
| 212 | 88   | 1764.51 | 555.09 | 909.27 | 123.92 | 4.38  | 12.78 | 4.73 | 10.87 | 1621.04 |
| 213 | 224  | 1760.21 | 543.74 | 914.89 | 124.10 | 4.71  | 11.03 | 5.47 | 13.35 | 1617.29 |
| 214 | 268  | 1759.55 | 540.71 | 917.19 | 126.08 | 4.82  | 9.65  | 5.52 | 13.44 | 1617.41 |
| 215 | 385  | 1757.35 | 529.60 | 921.86 | 126.27 | 5.00  | 13.17 | 5.71 | 13.93 | 1615.54 |
| 216 | 412  | 1748.51 | 527.39 | 914.41 | 126.66 | 5.24  | 12.28 | 5.88 | 14.28 | 1606.14 |
| 217 | 533  | 1742.00 | 522.91 | 909.66 | 128.44 | 5.39  | 12.06 | 6.08 | 15.05 | 1599.59 |

|     |      |         |        |        |        |       |       |      |       |         |
|-----|------|---------|--------|--------|--------|-------|-------|------|-------|---------|
| 218 | 628  | 1742.31 | 506.56 | 878.22 | 168.24 | 14.39 | 12.01 | 6.28 | 15.21 | 1600.91 |
| 219 | 780  | 1734.57 | 505.70 | 869.83 | 169.19 | 14.91 | 12.61 | 6.50 | 15.56 | 1594.30 |
| 220 | 820  | 1731.25 | 500.94 | 867.99 | 170.07 | 15.72 | 12.50 | 6.59 | 15.68 | 1589.49 |
| 221 | 1900 | 1720.70 | 498.74 | 865.84 | 171.49 | 16.46 | 9.62  | 7.12 | 16.55 | 1585.82 |
| 222 | 36   | 1761.70 | 549.59 | 918.31 | 119.96 | 3.79  | 12.26 | 4.18 | 10.27 | 1618.36 |
| 223 | 40   | 1760.79 | 558.31 | 906.71 | 120.25 | 3.85  | 12.35 | 4.33 | 11.23 | 1617.03 |
| 224 | 45   | 1763.26 | 559.06 | 907.63 | 120.50 | 3.94  | 12.20 | 4.36 | 11.45 | 1619.14 |
| 225 | 58   | 1762.58 | 559.20 | 909.31 | 121.15 | 4.16  | 10.82 | 4.49 | 11.61 | 1620.74 |
| 226 | 62   | 1753.27 | 539.81 | 917.11 | 121.24 | 4.19  | 12.87 | 4.57 | 11.65 | 1611.44 |
| 227 | 70   | 1754.57 | 548.53 | 907.75 | 123.43 | 4.28  | 12.12 | 4.62 | 11.74 | 1612.47 |
| 228 | 80   | 1746.34 | 549.41 | 899.77 | 124.35 | 4.32  | 11.67 | 4.66 | 11.78 | 1605.96 |
| 229 | 280  | 1748.87 | 548.93 | 900.24 | 124.52 | 5.31  | 11.19 | 5.55 | 13.35 | 1609.09 |
| 230 | 402  | 1743.28 | 531.64 | 907.83 | 124.77 | 5.45  | 12.33 | 5.89 | 15.04 | 1602.95 |
| 231 | 460  | 1741.40 | 524.41 | 912.53 | 125.09 | 5.49  | 12.18 | 5.92 | 15.27 | 1600.89 |
| 232 | 520  | 1740.61 | 508.69 | 928.20 | 125.86 | 5.60  | 11.06 | 5.98 | 15.63 | 1601.02 |
| 233 | 550  | 1741.26 | 507.83 | 878.79 | 169.96 | 14.01 | 9.65  | 6.08 | 15.67 | 1601.99 |
| 234 | 630  | 1738.77 | 505.23 | 873.59 | 171.17 | 14.49 | 12.21 | 6.37 | 15.95 | 1599.01 |
| 235 | 720  | 1740.27 | 497.76 | 880.46 | 171.45 | 14.84 | 12.29 | 6.51 | 16.06 | 1599.37 |
| 236 | 820  | 1737.27 | 497.10 | 881.98 | 171.67 | 15.42 | 11.79 | 6.65 | 16.23 | 1600.84 |
| 237 | 840  | 1732.19 | 496.69 | 874.71 | 173.44 | 15.54 | 12.85 | 6.71 | 16.32 | 1596.26 |
| 238 | 1850 | 1724.91 | 495.95 | 864.15 | 177.82 | 16.40 | 11.27 | 7.27 | 16.64 | 1589.50 |
| 239 | 36   | 1782.28 | 549.48 | 940.84 | 117.25 | 2.42  | 11.29 | 3.83 | 10.48 | 1635.59 |
| 240 | 41   | 1781.36 | 558.20 | 928.39 | 118.19 | 3.71  | 12.59 | 4.02 | 11.37 | 1636.47 |
| 241 | 48   | 1780.44 | 558.95 | 921.99 | 121.28 | 3.39  | 12.88 | 4.29 | 11.63 | 1634.41 |
| 242 | 53   | 1773.29 | 559.16 | 912.58 | 121.76 | 3.92  | 14.05 | 4.36 | 12.29 | 1628.12 |

|     |      |         |        |        |        |       |       |      |       |         |
|-----|------|---------|--------|--------|--------|-------|-------|------|-------|---------|
| 243 | 62   | 1772.80 | 539.70 | 933.10 | 122.56 | 4.19  | 11.78 | 4.49 | 12.45 | 1628.27 |
| 244 | 73   | 1772.18 | 548.42 | 923.41 | 123.44 | 4.34  | 11.45 | 4.58 | 12.66 | 1628.30 |
| 245 | 85   | 1771.51 | 549.17 | 919.72 | 124.35 | 4.38  | 11.11 | 4.65 | 12.94 | 1626.32 |
| 246 | 87   | 1770.27 | 549.31 | 920.15 | 125.03 | 4.50  | 9.78  | 4.70 | 13.47 | 1626.94 |
| 247 | 91   | 1770.04 | 546.69 | 923.39 | 126.16 | 4.56  | 8.57  | 4.87 | 13.63 | 1627.87 |
| 248 | 310  | 1757.19 | 529.07 | 922.85 | 126.65 | 5.09  | 9.82  | 5.76 | 15.12 | 1614.36 |
| 249 | 435  | 1759.27 | 525.96 | 921.52 | 129.10 | 5.32  | 11.96 | 5.93 | 15.64 | 1615.43 |
| 250 | 568  | 1756.76 | 514.63 | 882.68 | 170.13 | 14.58 | 11.92 | 6.25 | 15.67 | 1615.86 |
| 251 | 654  | 1754.54 | 505.57 | 887.40 | 171.07 | 14.85 | 12.75 | 6.59 | 16.04 | 1614.27 |
| 252 | 708  | 1752.67 | 502.44 | 888.97 | 171.79 | 15.16 | 10.87 | 6.71 | 16.15 | 1612.09 |
| 253 | 788  | 1752.25 | 502.20 | 885.75 | 173.00 | 15.45 | 12.09 | 6.86 | 16.48 | 1611.83 |
| 254 | 872  | 1750.52 | 497.73 | 886.64 | 176.16 | 15.49 | 12.16 | 6.99 | 16.52 | 1611.69 |
| 255 | 4150 | 1737.35 | 492.40 | 875.70 | 180.02 | 17.00 | 11.97 | 7.38 | 17.57 | 1602.04 |
| 256 | 55   | 1748.41 | 541.98 | 921.80 | 116.28 | 3.95  | 11.89 | 4.25 | 11.35 | 1611.50 |
| 257 | 63   | 1746.15 | 541.49 | 922.02 | 114.34 | 4.03  | 10.82 | 4.21 | 11.48 | 1608.39 |
| 258 | 102  | 1746.88 | 540.56 | 918.12 | 117.09 | 4.06  | 13.16 | 4.62 | 11.74 | 1609.35 |
| 259 | 116  | 1745.62 | 539.88 | 918.66 | 118.98 | 4.19  | 10.62 | 4.67 | 12.28 | 1609.28 |
| 260 | 146  | 1742.69 | 538.67 | 913.90 | 121.17 | 4.31  | 11.81 | 4.78 | 12.55 | 1607.19 |
| 261 | 187  | 1734.61 | 533.93 | 909.85 | 123.15 | 4.42  | 10.38 | 4.88 | 12.64 | 1599.25 |
| 262 | 233  | 1737.67 | 532.67 | 912.37 | 124.09 | 5.10  | 12.08 | 5.11 | 13.03 | 1604.45 |
| 263 | 413  | 1733.44 | 517.44 | 919.61 | 126.83 | 5.31  | 11.89 | 5.89 | 14.97 | 1601.94 |
| 264 | 685  | 1730.61 | 511.27 | 871.18 | 168.32 | 13.29 | 11.52 | 6.35 | 15.46 | 1597.39 |
| 265 | 1032 | 1717.30 | 511.40 | 852.09 | 171.16 | 15.42 | 11.71 | 7.01 | 16.04 | 1584.83 |
| 266 | 1148 | 1718.18 | 506.15 | 855.03 | 171.93 | 15.48 | 12.61 | 7.08 | 16.33 | 1584.61 |
| 267 | 1241 | 1714.24 | 510.86 | 846.97 | 174.56 | 15.55 | 11.33 | 7.19 | 16.48 | 1582.94 |

|     |       |         |        |        |        |       |       |      |       |         |
|-----|-------|---------|--------|--------|--------|-------|-------|------|-------|---------|
| 268 | 1289  | 1711.35 | 507.38 | 847.34 | 174.92 | 15.70 | 11.79 | 7.31 | 16.54 | 1580.98 |
| 269 | 1350  | 1701.28 | 506.49 | 836.65 | 175.47 | 15.78 | 11.20 | 7.36 | 16.62 | 1569.57 |
| 270 | 1475  | 1704.91 | 504.79 | 841.00 | 175.89 | 15.88 | 12.18 | 7.39 | 16.68 | 1573.81 |
| 271 | 26000 | 1688.52 | 494.13 | 838.04 | 177.16 | 16.81 | 10.96 | 7.65 | 17.05 | 1561.80 |
| 272 | 28000 | 1692.49 | 493.05 | 840.96 | 177.84 | 17.32 | 11.31 | 7.72 | 17.11 | 1565.31 |
| 273 | 36    | 1761.34 | 542.18 | 943.10 | 108.45 | 3.61  | 12.39 | 3.88 | 10.67 | 1624.28 |
| 274 | 40    | 1763.26 | 541.00 | 946.54 | 110.18 | 3.72  | 11.82 | 3.95 | 11.12 | 1628.33 |
| 275 | 50    | 1760.59 | 540.51 | 945.68 | 110.65 | 3.80  | 10.52 | 4.07 | 11.25 | 1626.48 |
| 276 | 58    | 1759.19 | 540.39 | 939.18 | 113.29 | 3.96  | 12.56 | 4.26 | 11.88 | 1625.52 |
| 277 | 63    | 1741.57 | 539.96 | 924.21 | 113.74 | 4.04  | 10.01 | 4.62 | 11.36 | 1607.94 |
| 278 | 66    | 1747.26 | 539.87 | 926.88 | 114.10 | 4.22  | 12.87 | 4.67 | 11.64 | 1614.25 |
| 279 | 70    | 1743.27 | 539.56 | 923.28 | 114.29 | 4.34  | 12.12 | 4.74 | 11.82 | 1610.15 |
| 280 | 75    | 1727.98 | 538.44 | 908.14 | 115.95 | 4.39  | 11.70 | 4.87 | 12.01 | 1595.50 |
| 281 | 81    | 1752.39 | 538.31 | 932.07 | 116.39 | 4.50  | 11.57 | 4.92 | 12.03 | 1619.79 |
| 282 | 225   | 1745.27 | 535.00 | 926.72 | 114.83 | 5.11  | 11.99 | 5.39 | 14.22 | 1613.26 |
| 283 | 260   | 1741.88 | 533.64 | 924.13 | 115.85 | 5.18  | 11.52 | 5.42 | 14.37 | 1610.11 |
| 284 | 291   | 1739.67 | 532.88 | 919.69 | 116.96 | 5.34  | 13.45 | 5.48 | 14.43 | 1608.23 |
| 285 | 348   | 1734.88 | 532.15 | 915.80 | 118.25 | 5.41  | 10.78 | 5.86 | 14.94 | 1603.19 |
| 286 | 365   | 1731.36 | 527.93 | 912.98 | 121.35 | 5.48  | 12.05 | 6.01 | 15.12 | 1600.92 |
| 287 | 510   | 1736.71 | 521.69 | 871.97 | 165.16 | 14.32 | 11.19 | 6.08 | 15.38 | 1605.79 |
| 288 | 750   | 1734.56 | 506.25 | 883.16 | 167.43 | 15.39 | 10.82 | 6.59 | 15.59 | 1605.23 |
| 289 | 920   | 1727.77 | 505.67 | 872.05 | 169.94 | 16.02 | 9.70  | 6.96 | 16.33 | 1596.67 |
| 290 | 2650  | 1722.05 | 500.60 | 869.25 | 172.90 | 17.40 | 12.08 | 7.12 | 17.06 | 1596.41 |
| 291 | 40    | 1737.24 | 548.41 | 905.61 | 113.45 | 4.02  | 11.50 | 3.72 | 10.65 | 1597.36 |
| 292 | 45    | 1738.91 | 546.50 | 909.81 | 114.32 | 4.15  | 12.18 | 3.81 | 11.23 | 1602.00 |

|     |      |         |        |        |        |       |       |      |       |         |
|-----|------|---------|--------|--------|--------|-------|-------|------|-------|---------|
| 293 | 55   | 1741.34 | 544.50 | 913.34 | 116.14 | 4.19  | 10.59 | 4.03 | 11.49 | 1604.28 |
| 294 | 62   | 1743.28 | 543.07 | 913.22 | 117.22 | 3.91  | 11.29 | 4.88 | 11.88 | 1605.47 |
| 295 | 64   | 1741.68 | 541.68 | 908.40 | 118.94 | 4.14  | 12.78 | 5.13 | 12.04 | 1603.11 |
| 296 | 70   | 1744.28 | 538.71 | 914.25 | 119.65 | 4.46  | 11.03 | 5.12 | 12.38 | 1605.60 |
| 297 | 80   | 1745.05 | 538.04 | 915.96 | 120.46 | 4.48  | 9.65  | 5.13 | 12.91 | 1606.63 |
| 298 | 201  | 1758.05 | 516.58 | 944.94 | 121.15 | 5.14  | 13.17 | 5.62 | 14.67 | 1621.27 |
| 299 | 240  | 1740.28 | 515.77 | 929.16 | 121.47 | 5.25  | 11.48 | 5.69 | 15.04 | 1603.86 |
| 300 | 300  | 1737.01 | 508.68 | 930.27 | 123.36 | 5.28  | 12.06 | 5.87 | 15.35 | 1600.87 |
| 301 | 367  | 1742.57 | 507.05 | 936.30 | 125.02 | 5.49  | 12.01 | 5.95 | 15.58 | 1607.40 |
| 302 | 382  | 1741.74 | 505.29 | 936.70 | 126.98 | 5.68  | 10.05 | 6.06 | 15.62 | 1606.38 |
| 303 | 478  | 1740.58 | 504.48 | 933.03 | 129.03 | 5.80  | 11.33 | 6.11 | 15.91 | 1605.69 |
| 304 | 536  | 1737.35 | 503.99 | 887.62 | 163.46 | 13.45 | 11.79 | 6.31 | 16.06 | 1602.68 |
| 305 | 750  | 1738.29 | 503.46 | 885.03 | 166.95 | 14.33 | 11.99 | 6.49 | 16.25 | 1604.50 |
| 306 | 1700 | 1730.41 | 503.37 | 871.88 | 170.05 | 15.82 | 11.92 | 6.61 | 16.63 | 1596.28 |
| 307 | 1900 | 1732.50 | 503.10 | 872.73 | 173.44 | 16.60 | 11.26 | 6.67 | 16.74 | 1600.54 |
| 308 | 2200 | 1726.24 | 502.75 | 866.84 | 176.29 | 17.11 | 12.08 | 6.78 | 16.79 | 1598.64 |
| 309 | 2500 | 1725.49 | 502.64 | 866.89 | 177.07 | 17.26 | 10.72 | 6.99 | 16.95 | 1598.52 |
| 310 | 52   | 1746.98 | 546.55 | 919.41 | 112.05 | 3.90  | 11.61 | 4.03 | 11.15 | 1608.70 |
| 311 | 55   | 1743.88 | 544.80 | 914.80 | 113.48 | 4.00  | 11.03 | 4.39 | 11.27 | 1603.77 |
| 312 | 65   | 1748.89 | 542.58 | 920.51 | 113.86 | 4.06  | 12.58 | 4.51 | 11.62 | 1609.72 |
| 313 | 70   | 1751.87 | 541.11 | 924.52 | 114.99 | 4.08  | 12.19 | 4.57 | 11.95 | 1613.41 |
| 314 | 70   | 1747.27 | 539.24 | 922.23 | 115.56 | 3.89  | 12.28 | 4.59 | 12.06 | 1609.85 |
| 315 | 135  | 1746.99 | 529.77 | 931.23 | 115.67 | 4.25  | 11.11 | 4.96 | 13.32 | 1610.31 |
| 316 | 240  | 1742.80 | 526.96 | 925.44 | 116.18 | 4.95  | 11.92 | 5.11 | 14.94 | 1605.50 |
| 317 | 320  | 1734.61 | 522.85 | 920.14 | 116.89 | 5.31  | 12.09 | 5.45 | 15.65 | 1598.38 |

|     |      |         |        |        |        |       |       |      |       |         |
|-----|------|---------|--------|--------|--------|-------|-------|------|-------|---------|
| 318 | 400  | 1735.98 | 515.07 | 927.92 | 118.04 | 5.39  | 11.99 | 5.56 | 15.91 | 1599.88 |
| 319 | 450  | 1734.87 | 511.63 | 929.33 | 118.36 | 5.52  | 11.98 | 5.62 | 15.96 | 1598.40 |
| 320 | 480  | 1731.99 | 506.49 | 931.39 | 118.92 | 5.65  | 12.19 | 5.92 | 16.03 | 1596.59 |
| 321 | 650  | 1730.90 | 505.37 | 871.36 | 170.13 | 14.43 | 11.59 | 6.11 | 16.34 | 1595.33 |
| 322 | 1100 | 1727.68 | 503.10 | 872.47 | 172.23 | 15.44 | 11.19 | 6.59 | 16.65 | 1597.67 |
| 323 | 1150 | 1728.06 | 496.54 | 877.69 | 173.15 | 15.78 | 12.16 | 6.61 | 16.74 | 1598.67 |
| 324 | 1200 | 1726.90 | 491.78 | 881.59 | 173.65 | 15.90 | 12.26 | 6.67 | 16.79 | 1598.64 |
| 325 | 1300 | 1723.17 | 503.87 | 866.81 | 174.03 | 16.09 | 12.00 | 6.78 | 16.86 | 1596.44 |
| 326 | 1800 | 1720.88 | 504.28 | 862.69 | 174.45 | 16.21 | 12.18 | 6.99 | 17.47 | 1594.27 |
| 327 | 35   | 1793.38 | 538.91 | 961.92 | 114.48 | 3.71  | 11.83 | 4.03 | 11.54 | 1646.42 |
| 328 | 37   | 1791.21 | 538.07 | 959.94 | 114.58 | 3.76  | 11.29 | 4.11 | 11.65 | 1643.40 |
| 329 | 40   | 1778.49 | 536.99 | 949.28 | 114.66 | 3.14  | 12.78 | 4.37 | 11.68 | 1632.90 |
| 330 | 50   | 1777.36 | 542.48 | 940.01 | 117.23 | 4.40  | 11.03 | 4.46 | 12.33 | 1631.94 |
| 331 | 55   | 1773.77 | 542.06 | 937.42 | 117.92 | 4.49  | 9.65  | 4.78 | 12.49 | 1628.81 |
| 332 | 120  | 1772.67 | 541.50 | 933.55 | 118.47 | 3.33  | 13.17 | 4.91 | 13.32 | 1628.25 |
| 333 | 150  | 1770.49 | 541.01 | 933.36 | 120.06 | 4.44  | 8.51  | 4.93 | 13.64 | 1625.95 |
| 334 | 180  | 1768.88 | 539.63 | 929.13 | 120.95 | 4.25  | 12.06 | 4.96 | 14.03 | 1625.01 |
| 335 | 220  | 1767.25 | 539.50 | 926.78 | 121.37 | 4.49  | 12.01 | 5.12 | 14.91 | 1624.18 |
| 336 | 260  | 1763.46 | 532.85 | 929.66 | 122.18 | 5.14  | 9.89  | 5.38 | 15.55 | 1620.65 |
| 337 | 350  | 1762.88 | 526.74 | 931.66 | 123.22 | 5.51  | 11.33 | 5.49 | 15.63 | 1619.58 |
| 338 | 400  | 1763.39 | 525.10 | 931.90 | 125.44 | 5.68  | 11.79 | 5.92 | 15.85 | 1621.68 |
| 339 | 500  | 1764.51 | 522.85 | 885.74 | 166.19 | 13.93 | 11.20 | 6.47 | 15.96 | 1622.34 |
| 340 | 550  | 1762.15 | 518.69 | 884.19 | 169.15 | 14.31 | 12.18 | 6.52 | 16.18 | 1621.22 |
| 341 | 700  | 1740.87 | 518.08 | 860.51 | 172.26 | 14.46 | 11.99 | 6.60 | 16.45 | 1600.35 |
| 342 | 730  | 1739.78 | 517.21 | 859.88 | 173.84 | 14.71 | 10.31 | 6.65 | 16.52 | 1599.12 |

|     |       |         |        |        |        |       |       |      |       |         |
|-----|-------|---------|--------|--------|--------|-------|-------|------|-------|---------|
| 343 | 1250  | 1737.34 | 506.05 | 867.03 | 175.49 | 15.44 | 12.39 | 6.99 | 17.13 | 1600.52 |
| 344 | 35    | 1771.31 | 537.58 | 948.14 | 109.95 | 4.46  | 11.82 | 3.75 | 10.75 | 1626.45 |
| 345 | 50    | 1776.54 | 535.40 | 953.61 | 110.30 | 4.72  | 11.78 | 4.03 | 10.94 | 1630.78 |
| 346 | 52    | 1778.26 | 535.07 | 952.68 | 111.46 | 5.41  | 11.26 | 4.06 | 11.15 | 1631.09 |
| 347 | 150   | 1786.60 | 526.79 | 971.46 | 111.63 | 5.49  | 10.01 | 4.57 | 12.22 | 1642.17 |
| 348 | 180   | 1779.65 | 526.28 | 964.30 | 112.28 | 3.81  | 12.09 | 4.66 | 12.45 | 1635.87 |
| 349 | 210   | 1773.56 | 523.65 | 959.99 | 112.85 | 3.56  | 11.12 | 5.01 | 14.07 | 1630.25 |
| 350 | 240   | 1774.65 | 523.44 | 957.45 | 113.94 | 4.94  | 11.98 | 5.07 | 14.26 | 1631.08 |
| 351 | 280   | 1772.95 | 522.87 | 953.35 | 115.47 | 5.81  | 12.70 | 5.25 | 14.38 | 1629.83 |
| 352 | 350   | 1770.85 | 520.61 | 956.13 | 116.06 | 6.03  | 10.01 | 5.49 | 15.13 | 1629.46 |
| 353 | 380   | 1769.51 | 512.48 | 962.68 | 116.30 | 5.32  | 11.88 | 5.68 | 15.56 | 1629.90 |
| 354 | 450   | 1770.26 | 510.45 | 963.75 | 117.12 | 6.40  | 11.28 | 5.86 | 15.62 | 1630.48 |
| 355 | 530   | 1746.67 | 506.69 | 888.04 | 164.37 | 13.79 | 12.23 | 6.08 | 15.75 | 1606.95 |
| 356 | 760   | 1748.85 | 504.81 | 892.19 | 166.39 | 14.41 | 10.92 | 6.46 | 15.84 | 1611.02 |
| 357 | 1180  | 1747.26 | 497.68 | 894.11 | 168.24 | 14.91 | 12.09 | 6.68 | 16.08 | 1609.79 |
| 358 | 1200  | 1742.44 | 496.05 | 887.61 | 171.13 | 15.14 | 12.70 | 6.76 | 16.16 | 1605.55 |
| 359 | 22000 | 1737.58 | 491.93 | 875.96 | 177.82 | 17.46 | 11.19 | 7.37 | 22.55 | 1604.28 |
| 360 | 38    | 1776.54 | 535.17 | 935.06 | 111.18 | 3.75  | 12.16 | 4.25 | 11.65 | 1613.22 |
| 361 | 40    | 1767.86 | 531.70 | 932.41 | 111.49 | 3.84  | 12.26 | 4.46 | 11.74 | 1607.90 |
| 362 | 45    | 1756.65 | 530.83 | 920.77 | 111.55 | 3.93  | 12.00 | 4.53 | 12.11 | 1595.72 |
| 363 | 50    | 1760.26 | 530.36 | 926.84 | 112.13 | 4.02  | 12.18 | 4.57 | 12.37 | 1602.47 |
| 364 | 56    | 1753.10 | 529.95 | 914.19 | 112.40 | 4.10  | 11.83 | 4.61 | 12.54 | 1589.62 |
| 365 | 62    | 1756.94 | 529.17 | 917.10 | 112.73 | 4.21  | 11.29 | 4.72 | 12.62 | 1591.84 |
| 366 | 75    | 1757.31 | 527.44 | 917.66 | 113.50 | 4.34  | 12.40 | 4.73 | 13.05 | 1593.12 |
| 367 | 81    | 1752.42 | 523.95 | 917.59 | 113.95 | 4.43  | 11.03 | 4.81 | 13.83 | 1589.59 |

|     |      |         |        |        |        |       |       |      |       |         |
|-----|------|---------|--------|--------|--------|-------|-------|------|-------|---------|
| 368 | 86   | 1750.20 | 520.73 | 916.18 | 114.94 | 4.54  | 9.65  | 4.86 | 14.34 | 1585.24 |
| 369 | 432  | 1753.49 | 516.96 | 909.45 | 115.87 | 5.41  | 13.17 | 5.92 | 16.21 | 1582.99 |
| 370 | 540  | 1761.26 | 511.67 | 859.62 | 168.16 | 14.31 | 12.28 | 5.98 | 16.35 | 1588.37 |
| 371 | 650  | 1768.69 | 506.36 | 870.35 | 168.85 | 14.49 | 12.06 | 6.09 | 16.66 | 1594.86 |
| 372 | 780  | 1753.14 | 501.50 | 856.56 | 169.97 | 14.80 | 12.01 | 6.37 | 17.04 | 1578.25 |
| 373 | 850  | 1784.77 | 496.61 | 891.30 | 171.56 | 15.42 | 10.71 | 6.78 | 17.18 | 1609.56 |
| 374 | 4600 | 1803.49 | 493.45 | 901.78 | 176.09 | 16.71 | 11.33 | 7.02 | 20.09 | 1626.47 |
| 375 | 32   | 1760.24 | 544.69 | 916.50 | 112.13 | 3.29  | 11.79 | 4.69 | 12.65 | 1605.74 |
| 376 | 38   | 1758.57 | 543.91 | 913.79 | 112.47 | 4.25  | 11.20 | 4.72 | 13.47 | 1603.81 |
| 377 | 42   | 1755.17 | 540.44 | 907.50 | 113.38 | 3.52  | 11.49 | 4.73 | 14.15 | 1595.21 |
| 378 | 49   | 1752.58 | 540.00 | 902.16 | 113.96 | 5.00  | 10.96 | 4.76 | 14.44 | 1591.28 |
| 379 | 52   | 1751.41 | 539.45 | 900.07 | 114.32 | 4.39  | 10.31 | 4.78 | 15.22 | 1588.54 |
| 380 | 60   | 1747.27 | 537.80 | 893.47 | 114.43 | 4.62  | 12.39 | 4.79 | 15.63 | 1583.13 |
| 381 | 65   | 1743.11 | 536.96 | 889.46 | 114.66 | 4.69  | 11.82 | 4.82 | 16.08 | 1578.49 |
| 382 | 73   | 1741.32 | 536.10 | 889.28 | 114.69 | 4.95  | 11.97 | 4.88 | 16.36 | 1578.23 |
| 383 | 80   | 1745.46 | 531.63 | 896.82 | 115.17 | 5.06  | 11.26 | 4.95 | 16.63 | 1581.52 |
| 384 | 145  | 1752.57 | 528.14 | 905.67 | 115.49 | 5.18  | 10.01 | 5.07 | 16.92 | 1586.48 |
| 385 | 285  | 1760.94 | 518.91 | 914.84 | 119.18 | 5.78  | 12.09 | 5.21 | 17.15 | 1593.16 |
| 386 | 560  | 1757.40 | 516.55 | 854.91 | 167.72 | 13.81 | 12.42 | 5.68 | 17.24 | 1588.33 |
| 387 | 650  | 1764.32 | 515.13 | 858.98 | 168.15 | 14.46 | 11.98 | 5.86 | 17.33 | 1591.89 |
| 388 | 750  | 1768.19 | 509.39 | 867.71 | 168.94 | 14.72 | 9.92  | 6.02 | 17.56 | 1594.26 |
| 389 | 835  | 1775.46 | 504.05 | 874.70 | 170.30 | 15.34 | 12.01 | 6.09 | 18.18 | 1600.67 |
| 390 | 2700 | 1791.97 | 496.87 | 885.96 | 174.16 | 16.10 | 12.68 | 6.72 | 20.42 | 1612.91 |
| 391 | 40   | 1672.38 | 528.85 | 842.79 | 113.27 | 5.19  | 12.12 | 4.37 | 11.37 | 1517.96 |
| 392 | 45   | 1683.29 | 528.46 | 850.76 | 113.48 | 4.42  | 12.49 | 4.49 | 12.21 | 1526.31 |



|     |      |         |        |        |        |       |       |      |       |         |
|-----|------|---------|--------|--------|--------|-------|-------|------|-------|---------|
| 393 | 47   | 1695.68 | 526.99 | 858.94 | 114.00 | 4.91  | 12.38 | 4.53 | 12.64 | 1534.39 |
| 394 | 52   | 1710.30 | 526.47 | 874.96 | 114.08 | 5.09  | 11.82 | 4.61 | 13.43 | 1550.46 |
| 395 | 62   | 1716.72 | 526.07 | 881.54 | 115.43 | 5.35  | 10.52 | 4.66 | 14.02 | 1557.59 |
| 396 | 67   | 1724.87 | 525.64 | 885.73 | 115.77 | 5.50  | 10.01 | 4.77 | 15.58 | 1563.00 |
| 397 | 75   | 1735.40 | 525.39 | 891.19 | 116.40 | 5.71  | 11.88 | 4.98 | 16.22 | 1571.77 |
| 398 | 79   | 1742.92 | 523.88 | 899.52 | 117.18 | 5.79  | 11.28 | 5.05 | 17.03 | 1579.73 |
| 399 | 160  | 1746.17 | 518.96 | 901.22 | 117.82 | 6.15  | 12.11 | 5.47 | 18.34 | 1580.07 |
| 400 | 220  | 1750.31 | 516.20 | 904.09 | 120.15 | 6.00  | 10.92 | 5.89 | 19.17 | 1582.42 |
| 401 | 400  | 1755.64 | 506.87 | 910.32 | 124.48 | 6.44  | 12.09 | 6.26 | 20.35 | 1586.81 |
| 402 | 550  | 1757.72 | 504.44 | 864.55 | 164.40 | 14.44 | 11.99 | 6.57 | 21.16 | 1587.55 |
| 403 | 630  | 1760.20 | 499.09 | 868.39 | 167.46 | 14.68 | 11.19 | 6.69 | 21.32 | 1588.82 |
| 404 | 710  | 1762.10 | 497.91 | 867.68 | 168.95 | 15.25 | 12.16 | 6.76 | 21.55 | 1590.26 |
| 405 | 750  | 1763.28 | 497.76 | 868.35 | 169.85 | 15.80 | 12.26 | 6.89 | 21.66 | 1592.57 |
| 406 | 880  | 1768.66 | 495.74 | 870.07 | 173.04 | 15.92 | 12.00 | 6.99 | 21.94 | 1595.70 |
| 407 | 3750 | 1783.57 | 493.59 | 879.14 | 175.88 | 16.98 | 12.18 | 7.55 | 23.43 | 1608.75 |
| 408 | 33   | 1698.60 | 541.83 | 850.35 | 114.86 | 4.69  | 11.83 | 3.94 | 11.27 | 1538.77 |
| 409 | 36   | 1705.27 | 539.57 | 857.68 | 115.26 | 4.93  | 11.29 | 3.97 | 11.65 | 1544.35 |
| 410 | 40   | 1707.87 | 537.41 | 862.14 | 115.44 | 5.44  | 10.60 | 4.05 | 12.32 | 1547.40 |
| 411 | 42   | 1710.94 | 537.29 | 864.91 | 115.66 | 4.06  | 11.03 | 4.09 | 12.54 | 1549.58 |
| 412 | 45   | 1712.27 | 537.23 | 868.85 | 116.12 | 4.84  | 9.65  | 4.13 | 13.16 | 1553.98 |
| 413 | 50   | 1714.68 | 534.15 | 868.39 | 116.93 | 3.81  | 11.03 | 4.39 | 13.52 | 1552.22 |
| 414 | 55   | 1717.95 | 533.63 | 872.78 | 117.08 | 3.50  | 12.28 | 4.47 | 14.21 | 1557.95 |
| 415 | 60   | 1725.66 | 533.33 | 847.32 | 117.46 | 5.49  | 12.06 | 4.56 | 44.68 | 1564.90 |
| 416 | 73   | 1726.32 | 520.06 | 886.56 | 118.95 | 5.42  | 12.01 | 4.71 | 15.34 | 1563.05 |
| 417 | 105  | 1730.27 | 519.48 | 895.64 | 120.07 | 5.04  | 8.61  | 4.92 | 16.03 | 1569.79 |

|     |     |         |        |        |        |      |       |      |       |         |
|-----|-----|---------|--------|--------|--------|------|-------|------|-------|---------|
| 418 | 115 | 1731.37 | 518.23 | 892.70 | 121.19 | 4.89 | 11.33 | 4.93 | 16.69 | 1569.96 |
| 419 | 120 | 1734.68 | 516.51 | 892.13 | 124.32 | 4.56 | 11.79 | 4.98 | 17.32 | 1571.61 |
| 420 | 122 | 1738.11 | 512.36 | 896.69 | 125.95 | 4.60 | 11.20 | 5.01 | 17.54 | 1573.35 |
| 421 | 135 | 1742.20 | 510.55 | 899.69 | 126.08 | 5.05 | 12.18 | 5.03 | 17.66 | 1576.24 |
| 422 | 160 | 1747.45 | 509.06 | 906.31 | 127.16 | 6.06 | 10.96 | 5.46 | 18.05 | 1583.06 |
| 423 | 265 | 1749.01 | 506.09 | 906.48 | 127.89 | 6.41 | 10.31 | 5.71 | 19.13 | 1582.02 |
| 424 | 35  | 1627.77 | 527.63 | 819.12 | 128.16 | 4.46 | 12.07 | 3.75 | 13.46 | 1508.65 |
| 425 | 36  | 1630.94 | 527.60 | 840.99 | 107.29 | 4.69 | 11.82 | 3.76 | 13.58 | 1509.73 |
| 426 | 40  | 1632.37 | 523.48 | 839.72 | 111.48 | 4.32 | 12.58 | 3.82 | 14.01 | 1509.41 |
| 427 | 45  | 1633.47 | 522.65 | 842.90 | 112.17 | 4.03 | 11.26 | 3.86 | 14.42 | 1511.29 |
| 428 | 48  | 1634.77 | 519.18 | 846.94 | 112.74 | 4.40 | 10.01 | 3.91 | 14.55 | 1511.73 |
| 429 | 55  | 1629.32 | 514.60 | 843.42 | 113.00 | 3.86 | 12.09 | 4.09 | 14.66 | 1505.72 |
| 430 | 60  | 1627.31 | 513.74 | 842.96 | 113.19 | 4.84 | 12.09 | 4.27 | 14.93 | 1506.02 |
| 431 | 70  | 1642.46 | 512.85 | 857.54 | 113.54 | 4.90 | 11.98 | 4.49 | 15.07 | 1520.37 |
| 432 | 75  | 1631.97 | 512.46 | 848.76 | 113.65 | 4.36 | 10.77 | 4.56 | 15.25 | 1509.81 |
| 433 | 80  | 1630.30 | 512.34 | 844.41 | 114.15 | 3.73 | 12.01 | 4.86 | 15.32 | 1506.82 |
| 434 | 88  | 1635.10 | 512.24 | 850.70 | 114.87 | 3.42 | 11.70 | 4.92 | 15.48 | 1513.33 |
| 435 | 93  | 1628.37 | 509.55 | 843.12 | 115.19 | 4.25 | 12.12 | 5.08 | 15.55 | 1504.86 |
| 436 | 150 | 1642.49 | 506.91 | 855.79 | 115.85 | 4.51 | 11.96 | 5.37 | 16.01 | 1516.40 |
| 437 | 370 | 1649.85 | 506.17 | 858.69 | 116.96 | 4.79 | 10.87 | 5.89 | 16.09 | 1519.46 |
| 438 | 450 | 1653.56 | 501.09 | 861.00 | 118.12 | 5.05 | 12.52 | 5.98 | 16.53 | 1520.29 |
| 439 | 40  | 1674.57 | 529.64 | 866.72 | 107.83 | 3.90 | 11.50 | 4.21 | 16.66 | 1540.46 |
| 440 | 45  | 1660.57 | 529.43 | 855.04 | 108.26 | 4.05 | 11.99 | 4.25 | 16.35 | 1529.37 |
| 441 | 50  | 1664.41 | 529.00 | 856.83 | 108.45 | 4.29 | 12.08 | 4.38 | 16.42 | 1531.45 |
| 442 | 56  | 1675.55 | 527.38 | 868.88 | 111.02 | 4.26 | 11.47 | 4.52 | 16.18 | 1543.71 |

|     |       |         |        |        |        |       |       |      |       |         |
|-----|-------|---------|--------|--------|--------|-------|-------|------|-------|---------|
| 443 | 63    | 1682.52 | 526.05 | 875.73 | 111.30 | 4.10  | 12.29 | 4.59 | 18.29 | 1552.35 |
| 444 | 72    | 1661.39 | 524.74 | 853.31 | 111.87 | 3.75  | 11.92 | 4.78 | 19.03 | 1529.40 |
| 445 | 88    | 1677.98 | 522.88 | 870.28 | 112.89 | 5.04  | 11.98 | 4.86 | 19.27 | 1547.20 |
| 446 | 91    | 1693.44 | 520.96 | 886.85 | 114.35 | 4.41  | 11.86 | 5.23 | 19.35 | 1563.01 |
| 447 | 200   | 1695.59 | 508.69 | 892.80 | 115.85 | 5.42  | 11.09 | 5.57 | 21.21 | 1560.63 |
| 448 | 230   | 1698.57 | 508.09 | 894.16 | 116.74 | 5.45  | 12.11 | 5.66 | 22.34 | 1564.55 |
| 449 | 560   | 1705.27 | 501.61 | 848.33 | 162.16 | 14.59 | 11.98 | 6.01 | 23.67 | 1568.35 |
| 450 | 920   | 1730.95 | 498.47 | 866.54 | 168.44 | 15.70 | 12.16 | 6.67 | 23.15 | 1591.13 |
| 451 | 3500  | 1758.36 | 493.45 | 884.96 | 176.03 | 16.82 | 11.50 | 7.03 | 23.99 | 1613.78 |
| 452 | 40    | 1627.78 | 537.17 | 833.94 | 107.88 | 3.59  | 11.82 | 4.52 | 11.63 | 1510.55 |
| 453 | 45    | 1630.84 | 536.04 | 834.65 | 108.19 | 3.93  | 12.19 | 4.66 | 12.07 | 1511.73 |
| 454 | 50    | 1643.46 | 532.75 | 847.48 | 108.92 | 4.44  | 9.80  | 4.73 | 11.45 | 1519.57 |
| 455 | 110   | 1661.70 | 531.40 | 859.42 | 115.10 | 4.01  | 11.99 | 5.57 | 10.85 | 1538.34 |
| 456 | 120   | 1650.27 | 527.44 | 851.37 | 115.47 | 4.46  | 11.89 | 5.66 | 10.74 | 1527.03 |
| 457 | 130   | 1671.38 | 525.40 | 872.05 | 115.64 | 4.30  | 11.52 | 5.69 | 11.36 | 1545.96 |
| 458 | 200   | 1659.75 | 514.83 | 863.86 | 118.12 | 4.95  | 11.88 | 5.86 | 12.15 | 1531.65 |
| 459 | 230   | 1664.37 | 513.85 | 868.17 | 118.72 | 5.19  | 12.65 | 5.92 | 13.48 | 1537.98 |
| 460 | 301   | 1672.68 | 512.47 | 875.01 | 123.46 | 5.44  | 12.06 | 5.99 | 13.94 | 1548.37 |
| 461 | 1050  | 1717.01 | 511.40 | 860.89 | 166.52 | 16.53 | 9.75  | 6.67 | 15.25 | 1587.01 |
| 462 | 1120  | 1723.66 | 506.15 | 870.06 | 168.04 | 16.78 | 10.93 | 6.71 | 15.75 | 1594.42 |
| 463 | 1180  | 1728.85 | 510.86 | 866.67 | 170.16 | 16.91 | 11.69 | 6.78 | 16.15 | 1599.22 |
| 464 | 1250  | 1739.37 | 507.38 | 878.63 | 171.07 | 16.99 | 11.19 | 6.83 | 16.52 | 1608.61 |
| 465 | 1270  | 1743.57 | 506.49 | 882.61 | 171.87 | 17.52 | 11.62 | 6.89 | 17.23 | 1614.23 |
| 466 | 1360  | 1746.98 | 495.95 | 889.38 | 173.49 | 17.54 | 12.78 | 6.96 | 17.87 | 1613.97 |
| 467 | 19000 | 1760.98 | 494.13 | 886.17 | 176.75 | 17.63 | 11.72 | 7.36 | 31.34 | 1625.10 |

|     |      |         |        |        |        |       |       |      |       |         |
|-----|------|---------|--------|--------|--------|-------|-------|------|-------|---------|
| 468 | 32   | 1793.39 | 535.64 | 963.70 | 125.94 | 4.02  | 11.93 | 3.51 | 11.45 | 1656.19 |
| 469 | 45   | 1789.69 | 533.74 | 962.94 | 126.15 | 4.24  | 11.70 | 3.99 | 12.67 | 1655.43 |
| 470 | 65   | 1783.67 | 531.71 | 961.16 | 126.30 | 3.86  | 11.81 | 4.11 | 13.39 | 1652.34 |
| 471 | 75   | 1790.38 | 527.60 | 967.11 | 126.32 | 4.58  | 11.99 | 4.38 | 14.23 | 1656.21 |
| 472 | 130  | 1788.44 | 526.89 | 967.90 | 126.85 | 3.44  | 11.52 | 4.62 | 15.12 | 1656.34 |
| 473 | 180  | 1778.44 | 525.77 | 952.42 | 126.97 | 4.33  | 13.25 | 4.95 | 15.95 | 1643.64 |
| 474 | 240  | 1767.71 | 512.63 | 952.10 | 127.03 | 5.11  | 12.80 | 5.38 | 16.24 | 1631.29 |
| 475 | 260  | 1779.35 | 512.07 | 964.71 | 127.28 | 5.35  | 12.29 | 5.49 | 16.62 | 1643.81 |
| 476 | 350  | 1771.90 | 508.63 | 958.00 | 127.65 | 5.49  | 11.19 | 5.86 | 17.85 | 1634.67 |
| 477 | 360  | 1775.86 | 507.65 | 962.55 | 128.72 | 5.56  | 10.82 | 5.91 | 18.37 | 1639.58 |
| 478 | 470  | 1786.65 | 506.10 | 971.38 | 130.10 | 5.62  | 10.59 | 6.09 | 18.66 | 1648.54 |
| 479 | 520  | 1773.40 | 505.36 | 912.38 | 166.49 | 12.34 | 12.08 | 6.27 | 19.82 | 1634.74 |
| 480 | 685  | 1777.28 | 503.84 | 911.56 | 167.72 | 14.43 | 11.50 | 6.53 | 20.28 | 1635.86 |
| 481 | 1150 | 1790.21 | 500.47 | 912.05 | 170.15 | 15.82 | 12.18 | 6.92 | 21.33 | 1638.92 |
| 482 | 1300 | 1792.45 | 498.97 | 912.96 | 172.26 | 16.03 | 11.83 | 6.98 | 21.64 | 1640.67 |
| 483 | 1850 | 1782.58 | 497.33 | 901.62 | 172.97 | 16.52 | 11.29 | 7.02 | 22.21 | 1628.96 |
| 484 | 41   | 1775.57 | 529.61 | 940.53 | 122.95 | 4.10  | 11.92 | 7.55 | 12.05 | 1628.71 |
| 485 | 45   | 1777.69 | 529.09 | 949.21 | 123.47 | 4.26  | 11.03 | 4.17 | 12.58 | 1633.81 |
| 486 | 62   | 1773.50 | 527.68 | 947.59 | 124.32 | 4.28  | 11.45 | 4.49 | 13.45 | 1633.26 |
| 487 | 75   | 1772.25 | 527.36 | 941.06 | 124.53 | 4.42  | 13.17 | 4.76 | 13.62 | 1628.92 |
| 488 | 120  | 1770.81 | 526.00 | 940.60 | 126.29 | 3.81  | 12.28 | 4.91 | 15.15 | 1629.04 |
| 489 | 125  | 1741.28 | 525.57 | 909.66 | 126.44 | 4.48  | 12.06 | 4.98 | 15.28 | 1598.47 |
| 490 | 136  | 1774.44 | 523.96 | 942.97 | 127.09 | 4.23  | 11.52 | 5.05 | 15.52 | 1630.34 |
| 491 | 210  | 1775.54 | 521.57 | 943.56 | 127.12 | 4.40  | 12.61 | 5.59 | 15.93 | 1630.78 |
| 492 | 280  | 1773.98 | 517.69 | 946.43 | 127.50 | 4.91  | 11.33 | 5.77 | 16.45 | 1630.08 |

|     |      |         |        |        |        |       |       |      |       |         |
|-----|------|---------|--------|--------|--------|-------|-------|------|-------|---------|
| 493 | 350  | 1770.81 | 519.07 | 938.56 | 128.02 | 5.14  | 11.48 | 5.71 | 17.04 | 1625.02 |
| 494 | 370  | 1774.65 | 516.86 | 941.28 | 128.94 | 5.29  | 11.92 | 5.88 | 17.47 | 1627.64 |
| 495 | 440  | 1779.37 | 512.63 | 948.82 | 130.45 | 5.50  | 12.09 | 6.03 | 18.03 | 1633.55 |
| 496 | 530  | 1782.57 | 510.48 | 906.15 | 165.63 | 15.40 | 11.56 | 6.39 | 18.94 | 1634.55 |
| 497 | 680  | 1783.42 | 505.46 | 909.67 | 167.36 | 15.61 | 11.11 | 6.49 | 20.21 | 1635.91 |
| 498 | 740  | 1778.72 | 503.45 | 900.34 | 168.84 | 15.99 | 11.83 | 6.78 | 21.38 | 1628.61 |
| 499 | 1250 | 1788.44 | 501.50 | 906.07 | 171.12 | 17.11 | 12.55 | 6.98 | 22.27 | 1637.60 |
| 500 | 1440 | 1795.60 | 498.77 | 913.39 | 172.26 | 17.39 | 11.78 | 6.96 | 23.45 | 1644.00 |
| 501 | 1800 | 1786.72 | 497.99 | 901.93 | 173.05 | 17.48 | 10.80 | 7.13 | 25.63 | 1634.01 |
| 502 | 35   | 1759.31 | 525.58 | 960.55 | 105.96 | 3.85  | 11.08 | 3.83 | 13.35 | 1624.20 |
| 503 | 65   | 1760.39 | 522.69 | 960.77 | 106.74 | 3.93  | 12.22 | 4.01 | 14.15 | 1624.51 |
| 504 | 122  | 1758.00 | 519.74 | 953.26 | 111.17 | 3.98  | 11.82 | 4.38 | 15.55 | 1619.90 |
| 505 | 126  | 1763.07 | 519.08 | 958.93 | 112.48 | 4.12  | 12.00 | 4.63 | 15.63 | 1626.87 |
| 506 | 130  | 1765.36 | 518.49 | 960.22 | 112.83 | 4.16  | 11.09 | 4.99 | 15.75 | 1627.53 |
| 507 | 130  | 1772.77 | 518.17 | 966.72 | 113.96 | 4.21  | 10.03 | 5.07 | 15.78 | 1633.94 |
| 508 | 210  | 1770.68 | 516.25 | 961.60 | 115.50 | 4.44  | 11.59 | 5.67 | 16.45 | 1631.50 |
| 509 | 270  | 1771.30 | 513.97 | 961.13 | 116.82 | 4.99  | 12.36 | 5.78 | 16.62 | 1631.67 |
| 510 | 360  | 1772.60 | 512.71 | 957.21 | 121.15 | 5.43  | 12.11 | 5.82 | 17.13 | 1631.56 |
| 511 | 425  | 1772.98 | 510.54 | 955.07 | 127.33 | 5.48  | 10.91 | 5.97 | 17.37 | 1632.67 |
| 512 | 500  | 1773.40 | 506.90 | 916.39 | 160.48 | 13.16 | 11.75 | 6.12 | 17.92 | 1632.72 |
| 513 | 750  | 1774.55 | 505.29 | 907.87 | 167.06 | 13.60 | 11.72 | 5.48 | 19.31 | 1630.33 |
| 514 | 1023 | 1783.19 | 503.95 | 909.20 | 169.16 | 14.81 | 12.21 | 6.72 | 20.25 | 1636.30 |
| 515 | 1069 | 1786.78 | 502.48 | 912.69 | 169.97 | 14.85 | 10.81 | 6.88 | 21.22 | 1638.90 |
| 516 | 1102 | 1797.20 | 500.77 | 920.76 | 171.49 | 14.86 | 10.89 | 6.92 | 21.64 | 1647.33 |
| 517 | 1120 | 1803.72 | 498.39 | 932.10 | 173.45 | 14.91 | 9.70  | 6.96 | 22.04 | 1657.55 |

|     |      |         |        |        |        |       |       |      |       |         |
|-----|------|---------|--------|--------|--------|-------|-------|------|-------|---------|
| 518 | 1250 | 1782.90 | 496.04 | 909.15 | 174.06 | 15.04 | 12.13 | 7.06 | 24.56 | 1638.04 |
| 519 | 40   | 1772.58 | 535.48 | 960.54 | 105.27 | 3.75  | 11.99 | 3.88 | 14.17 | 1635.08 |
| 520 | 42   | 1771.65 | 534.70 | 959.72 | 105.73 | 3.81  | 10.87 | 4.11 | 15.28 | 1634.22 |
| 521 | 47   | 1767.84 | 532.58 | 957.76 | 107.15 | 3.89  | 11.61 | 4.38 | 16.13 | 1633.50 |
| 522 | 50   | 1770.76 | 532.16 | 960.77 | 108.49 | 4.01  | 12.35 | 4.53 | 16.32 | 1638.63 |
| 523 | 51   | 1768.51 | 528.64 | 960.28 | 108.57 | 4.09  | 11.97 | 4.69 | 16.48 | 1634.72 |
| 524 | 55   | 1764.41 | 525.06 | 955.73 | 110.26 | 4.24  | 12.11 | 4.88 | 17.35 | 1629.63 |
| 525 | 60   | 1767.08 | 519.45 | 961.47 | 111.13 | 4.28  | 12.00 | 5.08 | 18.25 | 1631.66 |
| 526 | 71   | 1753.46 | 516.59 | 948.49 | 112.48 | 4.33  | 11.52 | 5.26 | 19.13 | 1617.80 |
| 527 | 110  | 1764.47 | 514.10 | 958.10 | 114.50 | 4.40  | 11.09 | 5.52 | 21.26 | 1628.97 |
| 528 | 116  | 1771.71 | 510.41 | 964.54 | 116.56 | 4.14  | 11.70 | 5.86 | 21.64 | 1634.85 |
| 529 | 118  | 1770.57 | 509.89 | 955.88 | 122.27 | 4.48  | 12.06 | 5.98 | 21.71 | 1632.27 |
| 530 | 350  | 1773.44 | 506.45 | 958.43 | 123.17 | 5.08  | 11.91 | 6.29 | 23.37 | 1634.70 |
| 531 | 435  | 1774.58 | 505.33 | 955.08 | 128.44 | 5.19  | 10.83 | 6.52 | 24.26 | 1635.65 |
| 532 | 468  | 1774.89 | 502.96 | 953.25 | 128.72 | 5.42  | 12.10 | 6.63 | 25.18 | 1634.26 |
| 533 | 594  | 1778.77 | 502.07 | 911.81 | 164.39 | 14.44 | 11.79 | 6.67 | 25.94 | 1637.11 |
| 534 | 750  | 1776.66 | 499.45 | 904.87 | 167.46 | 14.91 | 12.11 | 6.81 | 27.45 | 1633.06 |
| 535 | 1250 | 1789.90 | 498.09 | 908.63 | 172.85 | 16.50 | 11.93 | 6.96 | 29.07 | 1644.03 |
| 536 | 32   | 1771.58 | 526.35 | 968.08 | 106.59 | 3.70  | 11.82 | 3.89 | 11.25 | 1631.68 |
| 537 | 38   | 1764.68 | 525.69 | 964.66 | 106.82 | 3.83  | 11.47 | 3.96 | 11.38 | 1627.81 |
| 538 | 45   | 1762.87 | 525.55 | 960.39 | 107.92 | 3.95  | 12.08 | 4.08 | 11.47 | 1625.44 |
| 539 | 52   | 1756.42 | 525.26 | 954.25 | 108.46 | 3.99  | 11.98 | 4.12 | 12.12 | 1620.18 |
| 540 | 53   | 1760.24 | 523.94 | 958.53 | 108.63 | 4.09  | 12.00 | 4.39 | 12.54 | 1624.12 |
| 541 | 72   | 1756.55 | 523.58 | 952.43 | 110.03 | 4.25  | 12.02 | 4.98 | 13.05 | 1620.34 |
| 542 | 130  | 1761.40 | 521.81 | 953.57 | 113.56 | 4.31  | 12.16 | 5.05 | 14.23 | 1624.69 |

|     |      |         |        |        |        |       |       |      |       |         |
|-----|------|---------|--------|--------|--------|-------|-------|------|-------|---------|
| 543 | 170  | 1765.61 | 518.48 | 959.45 | 114.89 | 4.40  | 10.82 | 5.11 | 14.95 | 1628.10 |
| 544 | 240  | 1767.58 | 514.97 | 957.67 | 117.26 | 4.95  | 12.27 | 5.13 | 17.04 | 1629.29 |
| 545 | 310  | 1771.66 | 509.06 | 964.89 | 119.95 | 5.31  | 11.48 | 5.41 | 17.16 | 1633.26 |
| 546 | 360  | 1770.75 | 505.44 | 962.57 | 123.44 | 5.42  | 12.09 | 5.61 | 17.55 | 1632.12 |
| 547 | 390  | 1764.50 | 501.76 | 957.40 | 124.50 | 5.54  | 12.29 | 5.72 | 17.62 | 1624.83 |
| 548 | 500  | 1771.55 | 497.53 | 915.23 | 166.82 | 14.61 | 12.35 | 5.87 | 18.91 | 1631.32 |
| 549 | 710  | 1775.26 | 496.01 | 914.24 | 168.83 | 15.71 | 13.28 | 6.05 | 19.28 | 1633.40 |
| 550 | 760  | 1777.68 | 495.46 | 918.16 | 170.15 | 16.09 | 9.09  | 6.09 | 20.23 | 1635.27 |
| 551 | 1450 | 1783.91 | 492.00 | 917.84 | 174.49 | 16.81 | 9.72  | 6.81 | 21.47 | 1639.14 |
| 552 | 37   | 1741.72 | 532.38 | 935.10 | 105.46 | 3.71  | 11.98 | 4.59 | 11.27 | 1604.49 |
| 553 | 45   | 1749.40 | 530.71 | 942.19 | 106.26 | 3.82  | 12.06 | 4.76 | 11.48 | 1611.28 |
| 554 | 51   | 1754.27 | 530.48 | 947.08 | 106.89 | 3.86  | 9.57  | 4.85 | 12.34 | 1615.07 |
| 555 | 56   | 1754.99 | 527.53 | 948.40 | 108.06 | 3.88  | 10.12 | 4.91 | 12.65 | 1615.55 |
| 556 | 64   | 1757.39 | 523.96 | 951.75 | 108.99 | 4.14  | 10.91 | 4.93 | 12.92 | 1617.60 |
| 557 | 75   | 1761.14 | 519.50 | 956.66 | 109.88 | 4.18  | 11.50 | 4.97 | 13.57 | 1620.26 |
| 558 | 155  | 1762.35 | 508.76 | 964.90 | 111.29 | 4.35  | 11.99 | 5.65 | 14.08 | 1621.02 |
| 559 | 265  | 1765.88 | 505.86 | 964.78 | 117.13 | 4.41  | 11.06 | 5.71 | 15.13 | 1624.08 |
| 560 | 382  | 1771.10 | 504.60 | 967.12 | 120.49 | 4.83  | 10.73 | 5.82 | 15.27 | 1628.86 |
| 561 | 425  | 1763.57 | 503.97 | 953.63 | 126.23 | 5.05  | 10.23 | 5.86 | 15.92 | 1620.89 |
| 562 | 450  | 1767.65 | 503.48 | 954.04 | 126.96 | 5.42  | 12.10 | 5.98 | 16.25 | 1624.23 |
| 563 | 530  | 1774.25 | 503.10 | 912.28 | 166.39 | 14.10 | 12.16 | 6.11 | 16.49 | 1630.63 |
| 564 | 580  | 1773.48 | 501.89 | 911.61 | 166.88 | 14.49 | 11.99 | 6.36 | 16.53 | 1629.75 |
| 565 | 710  | 1778.98 | 500.59 | 915.35 | 168.16 | 15.28 | 11.61 | 6.59 | 16.61 | 1634.19 |
| 566 | 750  | 1779.47 | 500.51 | 913.67 | 168.63 | 15.46 | 12.29 | 6.67 | 16.65 | 1633.88 |
| 567 | 1089 | 1785.69 | 498.24 | 915.06 | 171.10 | 15.90 | 12.65 | 6.96 | 16.85 | 1636.76 |

|     |      |         |        |        |        |       |       |      |       |         |
|-----|------|---------|--------|--------|--------|-------|-------|------|-------|---------|
| 568 | 46   | 1604.91 | 523.38 | 820.13 | 107.72 | 3.78  | 11.27 | 4.46 | 12.04 | 1482.78 |
| 569 | 55   | 1605.57 | 520.68 | 823.37 | 107.84 | 3.86  | 11.78 | 4.62 | 12.32 | 1484.47 |
| 570 | 58   | 1603.32 | 519.15 | 821.96 | 108.20 | 3.89  | 10.22 | 4.68 | 12.64 | 1480.74 |
| 571 | 60   | 1607.51 | 516.06 | 827.67 | 110.48 | 3.98  | 9.81  | 4.73 | 13.09 | 1485.82 |
| 572 | 115  | 1608.45 | 508.70 | 832.58 | 110.53 | 4.44  | 10.92 | 5.51 | 14.27 | 1486.95 |
| 573 | 160  | 1613.35 | 506.33 | 837.38 | 110.55 | 4.46  | 11.77 | 5.59 | 14.38 | 1490.46 |
| 574 | 175  | 1614.55 | 506.11 | 836.92 | 112.17 | 4.71  | 11.99 | 5.91 | 14.54 | 1492.35 |
| 575 | 188  | 1616.71 | 505.93 | 838.22 | 112.47 | 4.80  | 11.52 | 5.96 | 14.63 | 1493.53 |
| 576 | 192  | 1617.29 | 505.35 | 837.06 | 112.96 | 4.92  | 11.71 | 6.02 | 15.01 | 1493.03 |
| 577 | 215  | 1623.35 | 468.40 | 878.04 | 114.48 | 5.31  | 10.72 | 6.28 | 15.35 | 1498.58 |
| 578 | 236  | 1624.41 | 503.54 | 841.87 | 114.87 | 5.39  | 11.33 | 6.35 | 15.47 | 1498.82 |
| 579 | 275  | 1622.27 | 503.07 | 835.71 | 117.15 | 5.56  | 11.79 | 6.37 | 15.55 | 1495.20 |
| 580 | 280  | 1624.51 | 501.59 | 839.05 | 118.15 | 5.72  | 11.20 | 6.41 | 15.67 | 1497.79 |
| 581 | 293  | 1625.05 | 501.30 | 834.04 | 121.39 | 5.78  | 12.18 | 6.61 | 16.06 | 1497.36 |
| 582 | 1240 | 1649.40 | 497.55 | 800.40 | 167.86 | 15.45 | 10.96 | 6.97 | 16.68 | 1515.87 |
| 583 | 1350 | 1647.87 | 497.49 | 797.47 | 168.19 | 15.79 | 11.31 | 7.08 | 16.92 | 1514.25 |
| 584 | 1400 | 1652.26 | 497.37 | 795.78 | 170.26 | 16.42 | 12.09 | 7.19 | 17.05 | 1516.16 |
| 585 | 1510 | 1653.57 | 496.99 | 792.97 | 173.44 | 17.70 | 11.82 | 7.27 | 17.14 | 1517.33 |
| 586 | 35   | 1639.58 | 537.87 | 834.70 | 113.06 | 3.60  | 10.52 | 4.27 | 12.67 | 1516.69 |
| 587 | 38   | 1641.34 | 534.69 | 835.55 | 114.56 | 3.71  | 12.56 | 4.36 | 12.71 | 1518.14 |
| 588 | 43   | 1639.45 | 527.85 | 840.23 | 114.93 | 3.79  | 10.56 | 4.62 | 13.05 | 1515.03 |
| 589 | 113  | 1659.55 | 523.98 | 860.15 | 116.15 | 4.11  | 12.87 | 4.67 | 13.18 | 1535.11 |
| 590 | 168  | 1660.39 | 520.98 | 863.36 | 116.83 | 4.19  | 12.12 | 4.81 | 13.56 | 1535.85 |
| 591 | 175  | 1663.46 | 519.45 | 864.36 | 117.29 | 4.44  | 11.70 | 4.99 | 14.12 | 1536.35 |
| 592 | 220  | 1665.60 | 510.10 | 871.97 | 118.15 | 4.81  | 11.57 | 5.31 | 14.45 | 1536.36 |



|     |       |         |        |        |        |       |       |      |       |         |
|-----|-------|---------|--------|--------|--------|-------|-------|------|-------|---------|
| 593 | 240   | 1670.77 | 508.93 | 873.29 | 120.94 | 4.92  | 11.99 | 5.46 | 15.21 | 1540.74 |
| 594 | 265   | 1671.58 | 508.17 | 871.80 | 123.48 | 5.04  | 11.52 | 5.51 | 15.64 | 1541.16 |
| 595 | 271   | 1671.77 | 506.85 | 870.40 | 125.02 | 5.25  | 11.49 | 5.63 | 16.33 | 1540.97 |
| 596 | 350   | 1642.11 | 506.46 | 838.71 | 126.43 | 5.46  | 10.78 | 5.71 | 16.59 | 1510.14 |
| 597 | 1023  | 1684.34 | 506.01 | 824.93 | 167.56 | 15.98 | 12.05 | 5.98 | 16.89 | 1549.40 |
| 598 | 1065  | 1685.49 | 503.59 | 826.67 | 169.17 | 16.15 | 11.19 | 6.03 | 16.91 | 1549.71 |
| 599 | 1132  | 1685.91 | 502.78 | 825.38 | 170.84 | 16.43 | 10.82 | 6.26 | 16.97 | 1549.48 |
| 600 | 1150  | 1686.54 | 500.51 | 824.45 | 173.46 | 16.50 | 11.47 | 6.42 | 17.05 | 1549.86 |
| 601 | 12000 | 1773.92 | 494.00 | 892.24 | 178.75 | 18.42 | 12.08 | 7.29 | 20.93 | 1623.71 |
| 602 | 38    | 1630.61 | 532.11 | 840.25 | 101.84 | 3.79  | 11.50 | 4.59 | 12.67 | 1506.75 |
| 603 | 45    | 1631.16 | 527.99 | 842.34 | 102.97 | 3.85  | 12.18 | 4.66 | 12.74 | 1506.73 |
| 604 | 52    | 1632.44 | 524.86 | 847.09 | 103.48 | 3.91  | 10.59 | 4.52 | 13.32 | 1507.77 |
| 605 | 70    | 1633.25 | 521.05 | 849.93 | 103.55 | 3.92  | 11.29 | 4.76 | 13.66 | 1508.16 |
| 606 | 120   | 1634.51 | 519.47 | 852.69 | 103.79 | 3.99  | 9.82  | 4.99 | 14.53 | 1509.28 |
| 607 | 128   | 1634.98 | 514.96 | 853.68 | 105.25 | 4.08  | 11.03 | 5.25 | 14.77 | 1509.02 |
| 608 | 133   | 1635.07 | 511.67 | 855.35 | 105.49 | 4.16  | 11.60 | 5.42 | 15.14 | 1508.83 |
| 609 | 140   | 1635.30 | 508.43 | 858.02 | 105.86 | 4.24  | 11.47 | 5.67 | 15.35 | 1509.04 |
| 610 | 146   | 1636.18 | 506.01 | 860.40 | 106.20 | 4.30  | 11.48 | 5.77 | 15.42 | 1509.58 |
| 611 | 152   | 1637.38 | 505.55 | 860.27 | 106.92 | 4.39  | 12.06 | 5.78 | 15.58 | 1510.55 |
| 612 | 158   | 1637.91 | 504.90 | 858.48 | 109.05 | 4.45  | 12.01 | 5.85 | 15.95 | 1510.69 |
| 613 | 166   | 1638.74 | 502.76 | 854.80 | 114.48 | 4.49  | 11.45 | 5.92 | 16.04 | 1509.94 |
| 614 | 180   | 1638.27 | 500.50 | 851.57 | 118.16 | 4.51  | 11.33 | 5.99 | 16.47 | 1508.53 |
| 615 | 210   | 1637.84 | 498.69 | 846.26 | 122.34 | 5.24  | 11.79 | 6.08 | 17.13 | 1507.53 |
| 616 | 1100  | 1669.85 | 496.44 | 814.02 | 167.82 | 17.14 | 11.99 | 6.71 | 18.55 | 1532.67 |
| 617 | 1120  | 1671.47 | 496.11 | 812.91 | 168.76 | 17.21 | 11.92 | 6.86 | 19.31 | 1533.08 |

|     |       |         |        |        |        |       |       |      |       |         |
|-----|-------|---------|--------|--------|--------|-------|-------|------|-------|---------|
| 618 | 16000 | 1768.90 | 491.79 | 890.91 | 178.04 | 17.79 | 11.26 | 7.36 | 22.23 | 1619.38 |
| 619 | 40    | 1613.41 | 538.09 | 815.95 | 107.92 | 3.36  | 10.72 | 3.88 | 11.58 | 1491.50 |
| 620 | 43    | 1614.68 | 535.63 | 817.82 | 108.29 | 3.48  | 10.72 | 4.07 | 11.95 | 1491.96 |
| 621 | 120   | 1617.86 | 529.77 | 821.44 | 110.06 | 4.11  | 11.61 | 4.46 | 12.27 | 1493.72 |
| 622 | 130   | 1618.32 | 518.97 | 830.67 | 111.18 | 4.20  | 11.03 | 4.82 | 13.06 | 1493.93 |
| 623 | 135   | 1619.36 | 513.57 | 833.43 | 113.08 | 4.29  | 12.11 | 4.95 | 13.47 | 1494.90 |
| 624 | 150   | 1622.20 | 511.69 | 836.83 | 113.89 | 4.35  | 12.19 | 5.03 | 13.62 | 1497.60 |
| 625 | 170   | 1622.92 | 510.57 | 837.17 | 114.30 | 4.38  | 12.28 | 5.27 | 13.93 | 1497.90 |
| 626 | 1032  | 1660.27 | 508.17 | 800.26 | 166.60 | 16.42 | 11.38 | 6.69 | 15.65 | 1525.17 |
| 627 | 1069  | 1663.45 | 506.35 | 803.26 | 167.48 | 16.51 | 11.92 | 6.78 | 15.92 | 1528.22 |
| 628 | 1075  | 1665.58 | 505.27 | 803.53 | 168.96 | 17.19 | 12.09 | 6.85 | 16.01 | 1529.90 |
| 629 | 1098  | 1666.40 | 503.94 | 804.49 | 169.13 | 17.68 | 11.99 | 6.92 | 16.08 | 1530.23 |
| 630 | 1150  | 1667.37 | 501.48 | 806.74 | 170.29 | 17.72 | 11.60 | 6.99 | 16.12 | 1530.94 |
| 631 | 1178  | 1668.80 | 499.80 | 807.58 | 171.15 | 18.05 | 12.19 | 7.12 | 16.25 | 1532.14 |
| 632 | 1185  | 1669.87 | 497.35 | 810.97 | 171.22 | 18.10 | 11.59 | 7.18 | 16.65 | 1533.06 |
| 633 | 23000 | 1754.89 | 492.33 | 877.42 | 177.85 | 18.71 | 11.19 | 7.67 | 21.41 | 1606.58 |
| 634 | 37    | 1610.80 | 529.83 | 818.11 | 107.16 | 2.95  | 12.16 | 4.22 | 11.54 | 1485.97 |
| 635 | 41    | 1611.57 | 528.47 | 817.98 | 107.96 | 3.11  | 12.11 | 4.49 | 12.25 | 1486.37 |
| 636 | 45    | 1614.68 | 525.55 | 821.41 | 109.06 | 4.19  | 12.00 | 4.56 | 12.57 | 1489.34 |
| 637 | 48    | 1615.24 | 523.94 | 821.87 | 109.98 | 3.88  | 12.18 | 4.71 | 13.01 | 1489.57 |
| 638 | 52    | 1615.89 | 522.04 | 821.72 | 110.46 | 4.36  | 11.83 | 4.83 | 13.42 | 1488.66 |
| 639 | 55    | 1616.66 | 519.16 | 825.76 | 110.67 | 3.84  | 11.29 | 4.88 | 13.66 | 1489.26 |
| 640 | 65    | 1617.35 | 514.60 | 830.02 | 111.28 | 3.88  | 10.70 | 4.97 | 13.93 | 1489.38 |
| 641 | 140   | 1618.24 | 507.01 | 836.57 | 111.45 | 3.90  | 11.03 | 5.49 | 14.68 | 1490.13 |
| 642 | 180   | 1616.80 | 503.55 | 835.92 | 112.13 | 4.71  | 11.52 | 5.61 | 15.14 | 1488.58 |

|     |     |         |        |        |        |       |       |      |       |         |
|-----|-----|---------|--------|--------|--------|-------|-------|------|-------|---------|
| 643 | 220 | 1620.28 | 503.43 | 835.50 | 112.44 | 4.81  | 13.17 | 5.96 | 15.84 | 1491.15 |
| 644 | 240 | 1621.39 | 503.36 | 833.51 | 113.53 | 5.15  | 13.75 | 6.11 | 16.01 | 1491.42 |
| 645 | 246 | 1621.87 | 503.25 | 834.61 | 113.75 | 4.52  | 12.06 | 6.17 | 16.25 | 1490.61 |
| 646 | 255 | 1622.50 | 503.07 | 835.15 | 114.33 | 3.36  | 12.01 | 6.39 | 16.32 | 1490.63 |
| 647 | 263 | 1622.72 | 502.84 | 831.44 | 114.82 | 4.94  | 12.65 | 6.48 | 16.49 | 1489.66 |
| 648 | 267 | 1622.85 | 502.57 | 831.76 | 116.06 | 4.82  | 11.33 | 6.52 | 16.53 | 1489.59 |
| 649 | 288 | 1623.26 | 502.40 | 830.91 | 117.14 | 4.29  | 11.79 | 6.61 | 16.64 | 1489.78 |
| 650 | 295 | 1624.39 | 502.06 | 828.91 | 119.23 | 5.35  | 11.20 | 6.72 | 16.68 | 1490.15 |
| 651 | 575 | 1627.77 | 501.21 | 772.58 | 165.19 | 17.04 | 12.18 | 6.98 | 16.77 | 1491.95 |
| 652 | 36  | 1626.24 | 524.03 | 843.45 | 108.19 | 3.88  | 11.99 | 4.45 | 10.25 | 1506.24 |
| 653 | 38  | 1627.41 | 521.60 | 849.45 | 108.53 | 4.40  | 10.31 | 4.58 | 9.63  | 1508.50 |
| 654 | 45  | 1627.70 | 520.96 | 851.89 | 108.95 | 2.53  | 12.02 | 4.66 | 9.36  | 1510.37 |
| 655 | 80  | 1628.15 | 519.41 | 852.60 | 109.10 | 3.99  | 11.82 | 5.07 | 8.14  | 1510.13 |
| 656 | 125 | 1628.52 | 516.45 | 851.30 | 110.06 | 5.42  | 11.78 | 5.31 | 8.03  | 1508.35 |
| 657 | 132 | 1628.86 | 514.94 | 854.60 | 110.58 | 3.15  | 11.26 | 5.49 | 8.21  | 1508.23 |
| 658 | 139 | 1629.27 | 513.67 | 853.98 | 112.14 | 4.15  | 12.13 | 5.61 | 8.45  | 1510.13 |
| 659 | 210 | 1629.42 | 508.87 | 853.91 | 113.22 | 5.11  | 12.09 | 5.72 | 10.14 | 1509.06 |
| 660 | 245 | 1629.28 | 508.01 | 853.13 | 114.34 | 5.70  | 11.12 | 5.75 | 10.25 | 1508.30 |
| 661 | 306 | 1629.06 | 507.44 | 850.36 | 115.43 | 5.15  | 11.98 | 5.89 | 10.37 | 1506.62 |
| 662 | 411 | 1629.87 | 506.68 | 850.11 | 117.29 | 4.84  | 11.47 | 5.98 | 10.49 | 1506.86 |
| 663 | 445 | 1629.94 | 506.54 | 847.61 | 119.39 | 5.56  | 10.95 | 6.02 | 10.54 | 1506.61 |
| 664 | 500 | 1631.28 | 506.41 | 792.45 | 166.18 | 13.71 | 11.88 | 6.28 | 10.85 | 1507.76 |
| 665 | 560 | 1636.26 | 506.11 | 795.80 | 167.43 | 13.96 | 11.28 | 6.37 | 10.18 | 1511.13 |
| 666 | 605 | 1640.57 | 505.49 | 797.63 | 167.94 | 14.65 | 12.23 | 6.47 | 10.37 | 1514.78 |
| 667 | 711 | 1641.20 | 503.61 | 798.16 | 169.06 | 15.14 | 10.92 | 6.65 | 10.94 | 1514.48 |

|     |       |         |        |        |        |       |       |      |       |         |
|-----|-------|---------|--------|--------|--------|-------|-------|------|-------|---------|
| 668 | 1100  | 1643.65 | 500.48 | 793.87 | 172.89 | 16.00 | 12.09 | 7.26 | 11.45 | 1514.04 |
| 669 | 18000 | 1753.29 | 494.09 | 895.89 | 177.77 | 18.75 | 11.89 | 7.59 | 15.32 | 1621.30 |
| 670 | 41    | 1740.62 | 523.71 | 944.02 | 109.95 | 3.90  | 11.19 | 4.38 | 10.35 | 1607.50 |
| 671 | 46    | 1741.24 | 515.00 | 950.98 | 110.08 | 4.02  | 12.16 | 4.53 | 10.95 | 1607.72 |
| 672 | 58    | 1742.36 | 513.44 | 950.94 | 110.47 | 4.25  | 12.26 | 4.56 | 12.38 | 1608.30 |
| 673 | 72    | 1743.14 | 508.69 | 954.90 | 111.15 | 4.48  | 12.00 | 4.72 | 13.03 | 1608.97 |
| 674 | 135   | 1743.59 | 506.41 | 954.47 | 112.30 | 4.81  | 10.78 | 4.88 | 15.67 | 1609.32 |
| 675 | 220   | 1754.34 | 506.09 | 961.10 | 114.38 | 5.12  | 11.83 | 4.98 | 16.16 | 1619.66 |
| 676 | 265   | 1754.48 | 505.55 | 959.51 | 115.86 | 5.71  | 11.29 | 5.02 | 16.44 | 1619.38 |
| 677 | 278   | 1754.67 | 504.97 | 960.48 | 116.36 | 4.84  | 10.92 | 5.08 | 16.72 | 1619.37 |
| 678 | 285   | 1754.81 | 503.84 | 960.35 | 116.75 | 5.41  | 11.03 | 5.11 | 16.95 | 1619.44 |
| 679 | 360   | 1754.95 | 502.36 | 958.30 | 117.73 | 5.90  | 12.22 | 5.62 | 17.12 | 1619.25 |
| 680 | 530   | 1755.54 | 501.79 | 900.71 | 166.05 | 16.49 | 11.36 | 5.66 | 17.57 | 1619.63 |
| 681 | 700   | 1756.16 | 501.09 | 897.87 | 166.98 | 17.11 | 12.28 | 6.03 | 17.91 | 1619.27 |
| 682 | 1120  | 1760.67 | 500.37 | 896.81 | 168.45 | 17.92 | 12.06 | 6.47 | 18.42 | 1620.50 |
| 683 | 1170  | 1760.78 | 500.25 | 895.35 | 168.74 | 18.74 | 12.01 | 6.61 | 18.65 | 1620.35 |
| 684 | 1200  | 1760.96 | 498.49 | 896.77 | 169.13 | 19.60 | 10.71 | 6.68 | 19.12 | 1620.50 |
| 685 | 1300  | 1761.50 | 497.98 | 898.15 | 170.27 | 17.12 | 11.33 | 6.76 | 19.37 | 1620.98 |
| 686 | 1350  | 1761.72 | 497.46 | 898.10 | 170.45 | 16.26 | 11.79 | 6.81 | 20.25 | 1621.12 |
| 687 | 23000 | 1773.48 | 493.60 | 897.22 | 177.13 | 17.89 | 11.20 | 7.29 | 24.07 | 1628.40 |
| 688 | 46    | 1738.87 | 533.48 | 928.19 | 117.13 | 4.04  | 11.49 | 4.68 | 10.27 | 1609.28 |
| 689 | 52    | 1738.94 | 529.41 | 931.17 | 118.48 | 3.55  | 10.96 | 4.76 | 10.38 | 1608.71 |
| 690 | 58    | 1739.39 | 527.57 | 932.35 | 118.93 | 3.93  | 10.31 | 4.87 | 10.76 | 1608.72 |
| 691 | 60    | 1740.15 | 524.49 | 932.79 | 120.13 | 3.85  | 11.78 | 4.96 | 11.15 | 1609.15 |
| 692 | 200   | 1740.57 | 513.98 | 939.03 | 121.08 | 4.26  | 11.82 | 5.49 | 13.49 | 1609.15 |

|     |       |         |        |        |        |       |       |      |       |         |
|-----|-------|---------|--------|--------|--------|-------|-------|------|-------|---------|
| 693 | 210   | 1740.98 | 511.60 | 940.08 | 121.75 | 4.92  | 11.97 | 5.56 | 13.62 | 1609.50 |
| 694 | 215   | 1741.09 | 506.97 | 943.50 | 122.94 | 4.84  | 11.26 | 5.75 | 14.14 | 1609.40 |
| 695 | 220   | 1741.87 | 506.46 | 941.69 | 124.59 | 5.13  | 11.98 | 5.83 | 14.36 | 1610.04 |
| 696 | 245   | 1742.00 | 506.11 | 940.30 | 125.83 | 5.45  | 12.09 | 5.89 | 14.43 | 1610.10 |
| 697 | 260   | 1742.28 | 505.46 | 939.16 | 126.66 | 5.46  | 12.42 | 6.01 | 14.64 | 1609.81 |
| 698 | 275   | 1742.41 | 504.89 | 939.46 | 127.32 | 5.04  | 11.98 | 6.09 | 14.97 | 1609.75 |
| 699 | 1050  | 1747.45 | 503.45 | 890.81 | 167.43 | 17.02 | 10.69 | 6.36 | 15.93 | 1611.69 |
| 700 | 1080  | 1748.61 | 502.56 | 889.88 | 167.82 | 17.80 | 12.01 | 6.48 | 16.16 | 1612.71 |
| 701 | 1095  | 1749.16 | 501.77 | 890.28 | 168.00 | 17.31 | 12.68 | 6.56 | 16.37 | 1612.97 |
| 702 | 1120  | 1749.62 | 501.09 | 891.97 | 168.49 | 17.13 | 11.50 | 6.67 | 16.44 | 1613.29 |
| 703 | 1200  | 1749.84 | 500.04 | 890.39 | 169.03 | 18.09 | 12.49 | 6.78 | 16.58 | 1613.40 |
| 704 | 31000 | 1766.29 | 488.47 | 922.98 | 177.64 | 18.68 | 12.38 | 7.28 | 15.64 | 1643.07 |
| 705 | 40    | 1647.71 | 529.77 | 853.15 | 110.19 | 4.19  | 11.82 | 4.43 | 11.15 | 1524.70 |
| 706 | 42    | 1648.36 | 526.09 | 859.74 | 110.78 | 4.35  | 10.52 | 4.52 | 11.27 | 1527.27 |
| 707 | 45    | 1647.57 | 523.85 | 862.12 | 111.46 | 4.51  | 12.55 | 4.61 | 11.49 | 1530.59 |
| 708 | 54    | 1646.32 | 520.51 | 877.43 | 111.86 | 3.52  | 11.88 | 4.69 | 12.01 | 1541.90 |
| 709 | 60    | 1650.28 | 516.76 | 890.49 | 113.07 | 3.64  | 11.28 | 4.76 | 12.15 | 1552.15 |
| 710 | 72    | 1647.42 | 513.83 | 873.16 | 114.08 | 3.69  | 12.11 | 4.99 | 12.34 | 1534.20 |
| 711 | 112   | 1643.98 | 508.01 | 870.16 | 117.13 | 4.04  | 10.92 | 5.41 | 12.91 | 1528.58 |
| 712 | 138   | 1648.00 | 506.55 | 869.71 | 117.93 | 4.25  | 12.09 | 5.47 | 13.06 | 1529.06 |
| 713 | 146   | 1648.28 | 505.97 | 868.39 | 119.16 | 4.31  | 11.99 | 5.63 | 13.15 | 1528.60 |
| 714 | 155   | 1649.85 | 505.84 | 868.91 | 119.82 | 4.40  | 11.19 | 5.65 | 13.18 | 1528.99 |
| 715 | 160   | 1650.42 | 505.45 | 866.30 | 122.35 | 4.13  | 12.16 | 5.78 | 13.23 | 1529.40 |
| 716 | 225   | 1651.27 | 504.53 | 864.73 | 123.44 | 4.61  | 12.26 | 6.01 | 13.65 | 1529.23 |
| 717 | 270   | 1652.28 | 503.70 | 866.67 | 124.33 | 4.80  | 10.72 | 6.06 | 13.94 | 1530.22 |

|     |      |         |        |        |        |       |       |      |       |         |
|-----|------|---------|--------|--------|--------|-------|-------|------|-------|---------|
| 718 | 278  | 1650.36 | 502.89 | 862.55 | 124.50 | 5.32  | 12.18 | 6.27 | 14.22 | 1527.93 |
| 719 | 285  | 1651.27 | 501.74 | 863.34 | 125.16 | 5.38  | 11.83 | 6.69 | 14.54 | 1528.68 |
| 720 | 1550 | 1682.27 | 496.63 | 845.50 | 166.04 | 15.31 | 11.29 | 7.01 | 15.18 | 1556.96 |
| 721 | 32   | 1605.64 | 525.84 | 834.50 | 106.58 | 3.29  | 10.60 | 4.95 | 10.75 | 1496.51 |
| 722 | 38   | 1607.35 | 525.10 | 834.10 | 107.14 | 3.89  | 11.60 | 4.98 | 10.78 | 1497.59 |
| 723 | 45   | 1608.20 | 523.97 | 835.46 | 107.66 | 3.91  | 10.82 | 5.03 | 11.12 | 1497.97 |
| 724 | 47   | 1608.92 | 522.86 | 836.02 | 107.73 | 4.05  | 11.03 | 5.07 | 11.34 | 1498.10 |
| 725 | 55   | 1608.97 | 521.61 | 835.41 | 108.07 | 4.08  | 12.28 | 5.09 | 11.49 | 1498.03 |
| 726 | 61   | 1609.08 | 520.64 | 835.95 | 108.48 | 4.14  | 12.06 | 5.11 | 11.57 | 1497.95 |
| 727 | 74   | 1609.46 | 519.45 | 834.02 | 111.15 | 4.21  | 12.01 | 5.31 | 11.65 | 1497.80 |
| 728 | 80   | 1609.92 | 519.16 | 835.89 | 112.29 | 4.29  | 9.23  | 5.41 | 11.71 | 1497.98 |
| 729 | 225  | 1610.27 | 509.58 | 836.40 | 116.35 | 4.39  | 11.33 | 6.47 | 13.36 | 1497.88 |
| 730 | 265  | 1610.76 | 509.40 | 835.37 | 117.13 | 5.00  | 11.11 | 6.59 | 13.67 | 1498.27 |
| 731 | 460  | 1610.92 | 508.97 | 826.50 | 123.22 | 5.14  | 11.20 | 7.07 | 15.03 | 1497.13 |
| 732 | 470  | 1611.55 | 508.48 | 824.97 | 123.94 | 5.39  | 12.18 | 7.19 | 15.21 | 1497.36 |
| 733 | 550  | 1612.86 | 508.16 | 782.60 | 156.58 | 17.36 | 10.96 | 7.22 | 15.61 | 1498.49 |
| 734 | 680  | 1613.40 | 507.13 | 777.89 | 162.99 | 17.40 | 10.31 | 7.25 | 15.75 | 1498.72 |
| 735 | 785  | 1614.21 | 504.70 | 773.72 | 167.38 | 17.74 | 12.07 | 7.27 | 16.03 | 1498.91 |
| 736 | 820  | 1614.62 | 501.57 | 773.92 | 168.90 | 17.79 | 11.82 | 7.31 | 16.15 | 1497.46 |
| 737 | 865  | 1617.31 | 499.04 | 776.97 | 169.74 | 18.10 | 11.82 | 7.33 | 16.31 | 1499.31 |
| 738 | 910  | 1623.84 | 496.99 | 780.94 | 172.19 | 18.21 | 11.26 | 7.36 | 16.47 | 1503.42 |
| 739 | 55   | 1630.39 | 519.98 | 856.63 | 113.29 | 4.04  | 8.69  | 4.61 | 11.68 | 1518.92 |
| 740 | 1120 | 1630.77 | 500.49 | 791.97 | 173.03 | 17.99 | 12.09 | 6.85 | 15.59 | 1518.01 |
| 741 | 130  | 1631.17 | 520.60 | 846.68 | 118.12 | 4.80  | 12.09 | 4.63 | 11.34 | 1518.26 |
| 742 | 135  | 1631.65 | 519.63 | 846.70 | 118.89 | 4.98  | 11.98 | 4.68 | 11.67 | 1518.53 |

|     |       |         |        |        |        |       |       |      |       |         |
|-----|-------|---------|--------|--------|--------|-------|-------|------|-------|---------|
| 743 | 200   | 1631.85 | 511.95 | 848.60 | 124.36 | 4.95  | 10.77 | 5.52 | 12.32 | 1518.47 |
| 744 | 210   | 1632.06 | 511.36 | 847.17 | 124.82 | 5.01  | 12.01 | 5.56 | 12.44 | 1518.37 |
| 745 | 235   | 1632.31 | 510.58 | 847.53 | 125.30 | 5.09  | 11.70 | 5.67 | 12.57 | 1518.44 |
| 746 | 255   | 1632.77 | 510.11 | 847.16 | 125.67 | 5.15  | 12.12 | 5.78 | 12.66 | 1518.65 |
| 747 | 268   | 1633.36 | 509.06 | 848.36 | 125.87 | 5.19  | 11.96 | 5.91 | 12.73 | 1519.08 |
| 748 | 275   | 1633.49 | 507.89 | 850.09 | 125.99 | 5.30  | 10.87 | 5.96 | 12.95 | 1519.05 |
| 749 | 280   | 1633.87 | 506.88 | 848.70 | 126.80 | 5.38  | 11.92 | 6.08 | 13.32 | 1519.08 |
| 750 | 290   | 1634.15 | 506.56 | 848.57 | 127.16 | 5.49  | 11.50 | 6.29 | 13.52 | 1519.09 |
| 751 | 1020  | 1656.60 | 504.11 | 816.73 | 166.36 | 17.12 | 11.99 | 6.61 | 15.65 | 1538.57 |
| 752 | 1035  | 1657.29 | 503.43 | 817.05 | 166.66 | 17.33 | 12.08 | 6.67 | 15.76 | 1538.98 |
| 753 | 1055  | 1657.82 | 502.48 | 817.90 | 167.04 | 17.44 | 11.47 | 6.76 | 15.95 | 1539.04 |
| 754 | 1088  | 1658.35 | 501.45 | 817.39 | 167.72 | 17.49 | 12.29 | 6.82 | 16.15 | 1539.31 |
| 755 | 23000 | 1684.46 | 490.94 | 843.01 | 177.50 | 18.35 | 11.91 | 7.33 | 14.02 | 1563.06 |
| 756 | 40    | 1612.91 | 552.11 | 796.74 | 117.73 | 3.91  | 11.19 | 4.78 | 12.36 | 1498.82 |
| 757 | 45    | 1613.26 | 538.49 | 807.26 | 119.15 | 4.26  | 11.86 | 4.82 | 13.01 | 1498.85 |
| 758 | 48    | 1613.61 | 526.86 | 817.93 | 120.48 | 4.28  | 11.09 | 4.98 | 13.33 | 1498.95 |
| 759 | 101   | 1613.82 | 515.05 | 826.64 | 121.23 | 4.35  | 12.11 | 5.05 | 14.48 | 1498.91 |
| 760 | 136   | 1614.34 | 510.97 | 828.95 | 122.88 | 4.40  | 11.98 | 5.47 | 14.69 | 1499.34 |
| 761 | 145   | 1614.61 | 506.51 | 829.02 | 126.94 | 4.52  | 11.80 | 5.61 | 15.14 | 1499.54 |
| 762 | 150   | 1614.97 | 506.39 | 827.43 | 128.02 | 4.69  | 11.99 | 5.65 | 15.62 | 1499.79 |
| 763 | 155   | 1615.30 | 506.28 | 826.88 | 128.19 | 5.11  | 11.47 | 5.78 | 16.33 | 1500.04 |
| 764 | 160   | 1615.39 | 504.60 | 826.15 | 128.68 | 5.19  | 11.91 | 5.82 | 17.71 | 1500.06 |
| 765 | 1103  | 1630.77 | 497.76 | 801.41 | 165.38 | 17.55 | 12.32 | 6.96 | 14.02 | 1515.40 |
| 766 | 1105  | 1633.31 | 497.57 | 803.91 | 165.75 | 17.60 | 11.81 | 7.01 | 14.18 | 1517.83 |
| 767 | 1009  | 1634.36 | 496.90 | 805.80 | 166.17 | 17.62 | 11.60 | 7.09 | 13.67 | 1518.85 |

|      |         |         |        |         |        |        |       |       |        |         |
|------|---------|---------|--------|---------|--------|--------|-------|-------|--------|---------|
| 768  | 1020    | 1635.57 | 496.50 | 805.47  | 166.34 | 17.65  | 12.08 | 7.18  | 14.46  | 1519.68 |
| 769  | 1055    | 1635.79 | 495.76 | 806.56  | 166.63 | 17.71  | 11.73 | 7.22  | 14.04  | 1519.65 |
| 770  | 1065    | 1635.95 | 493.95 | 807.88  | 167.02 | 17.79  | 11.12 | 7.25  | 13.65  | 1518.66 |
| 771  | 1070    | 1636.20 | 493.38 | 806.28  | 166.99 | 17.84  | 11.57 | 7.35  | 14.76  | 1518.17 |
| 772  | 1175    | 1636.62 | 493.07 | 805.92  | 167.36 | 18.43  | 11.93 | 7.37  | 14.13  | 1518.21 |
| 773  | 12000   | 1685.50 | 491.50 | 845.31  | 176.49 | 18.90  | 12.12 | 7.61  | 12.55  | 1564.48 |
| Mean | 843.59  | 1721.02 | 500.00 | 866.17  | 167.11 | 15.69  | 11.73 | 6.93  | 17.81  | 1585.44 |
| SD.  | 2956.38 | 1380.56 | 359.29 | 1233.42 | 546.19 | 124.31 | 35.04 | 21.06 | 112.83 | 1214.41 |
| Max  | 32000   | 1803.72 | 568.70 | 989.37  | 187.76 | 21.40  | 14.05 | 8.37  | 44.68  | 1657.55 |
| Min  | 32      | 1584.74 | 468.40 | 614.13  | 101.84 | 2.31   | 8.51  | 2.56  | 8.03   | 1321.1  |
