# Supplementary material for: Empirical analysis of pig welfare levels and their impact on pig breeding efficiency—Based on 773 pig farmers’ survey data
Source: PubMed Central journal article supplement (PMC5744959; doi:10.1371/journal.pone.0190108), 2017-12-27
Supplement: pone.0190108.s004.pdf [file pone.0190108.s004.pdf]

## S4: variables explained and statistical description

| Sample No. | Age | gender<br>(women=0;<br>men=1) | education level<br>(elementary school<br>level and below=1;<br>junior high school=2;<br>high school=3;<br>university or<br>above=4) | breeding<br>years | Revenue (%) | farming scale<br>(small=1;<br>medium-sized=2;<br>large=3) | housed<br>livestock<br>(open=0;<br>enclosed=1) | waste<br>disposal<br>equipment<br>(do not<br>have=0;<br>have=1) | science and<br>technology<br>personnel<br>(insufficient=0;<br>adequate=1) | comprehensive pig<br>welfare level<br>(poor=1; medium=2;<br>good=3; optimal=4) |
|------------|-----|-------------------------------|-------------------------------------------------------------------------------------------------------------------------------------|-------------------|-------------|-----------------------------------------------------------|------------------------------------------------|-----------------------------------------------------------------|---------------------------------------------------------------------------|--------------------------------------------------------------------------------|
| 1          | 50  | 1                             | 3                                                                                                                                   | 19.08             | 26.15       | 1                                                         | 0                                              | 0                                                               | 1                                                                         | 1                                                                              |
| 2          | 55  | 1                             | 2                                                                                                                                   | 17.25             | 25.72       | 1                                                         | 0                                              | 0                                                               | 0                                                                         | 1                                                                              |
| 3          | 53  | 1                             | 3                                                                                                                                   | 16.42             | 27.21       | 1                                                         | 0                                              | 0                                                               | 0                                                                         | 2                                                                              |
| 4          | 49  | 0                             | 2                                                                                                                                   | 14.5              | 29.72       | 1                                                         | 0                                              | 0                                                               | 0                                                                         | 1                                                                              |
| 5          | 54  | 1                             | 2                                                                                                                                   | 12.67             | 30.40       | 1                                                         | 0                                              | 0                                                               | 0                                                                         | 1                                                                              |
| 6          | 45  | 1                             | 3                                                                                                                                   | 9.83              | 51.89       | 2                                                         | 1                                              | 0                                                               | 1                                                                         | 2                                                                              |
| 7          | 44  | 0                             | 3                                                                                                                                   | 7.92              | 48.32       | 2                                                         | 0                                              | 0                                                               | 0                                                                         | 2                                                                              |
| 8          | 43  | 0                             | 3                                                                                                                                   | 10.33             | 38.52       | 2                                                         | 1                                              | 0                                                               | 0                                                                         | 2                                                                              |
| 9          | 45  | 0                             | 3                                                                                                                                   | 9.25              | 39.24       | 2                                                         | 1                                              | 0                                                               | 1                                                                         | 2                                                                              |
| 10         | 48  | 1                             | 3                                                                                                                                   | 11.17             | 56.43       | 2                                                         | 1                                              | 0                                                               | 0                                                                         | 2                                                                              |
| 11         | 44  | 0                             | 3                                                                                                                                   | 12.58             | 54.89       | 2                                                         | 1                                              | 0                                                               | 0                                                                         | 2                                                                              |
| 12         | 41  | 0                             | 2                                                                                                                                   | 4.67              | 66.39       | 3                                                         | 0                                              | 1                                                               | 1                                                                         | 3                                                                              |
| 13         | 43  | 1                             | 3                                                                                                                                   | 5.83              | 67.23       | 3                                                         | 0                                              | 1                                                               | 1                                                                         | 3                                                                              |
| 14         | 44  | 1                             | 2                                                                                                                                   | 9.17              | 61.98       | 3                                                         | 1                                              | 1                                                               | 1                                                                         | 2                                                                              |

|    |    |   |   |       |       |   |   |   |   |   |
|----|----|---|---|-------|-------|---|---|---|---|---|
| 15 | 49 | 1 | 3 | 7.92  | 66.99 | 3 | 1 | 1 | 1 | 2 |
| 16 | 40 | 1 | 4 | 7.42  | 67.81 | 3 | 1 | 1 | 1 | 2 |
| 17 | 37 | 0 | 4 | 6.33  | 64.61 | 3 | 1 | 1 | 1 | 3 |
| 18 | 39 | 1 | 3 | 11.5  | 69.80 | 3 | 1 | 1 | 1 | 4 |
| 19 | 61 | 1 | 1 | 8.58  | 20.34 | 1 | 0 | 0 | 1 | 1 |
| 20 | 55 | 1 | 2 | 13.83 | 21.04 | 1 | 0 | 0 | 0 | 1 |
| 21 | 46 | 0 | 2 | 12.25 | 21.42 | 1 | 0 | 0 | 0 | 2 |
| 22 | 50 | 1 | 3 | 15.17 | 19.53 | 1 | 0 | 0 | 0 | 1 |
| 23 | 41 | 0 | 3 | 6.83  | 21.23 | 2 | 0 | 0 | 0 | 1 |
| 24 | 52 | 0 | 2 | 9.08  | 27.23 | 2 | 0 | 0 | 0 | 1 |
| 25 | 47 | 1 | 3 | 14.75 | 33.08 | 2 | 1 | 0 | 1 | 2 |
| 26 | 44 | 1 | 3 | 12.33 | 38.35 | 2 | 1 | 0 | 0 | 2 |
| 27 | 48 | 1 | 3 | 8.17  | 43.74 | 2 | 1 | 0 | 1 | 2 |
| 28 | 45 | 0 | 3 | 9.83  | 50.42 | 2 | 1 | 0 | 1 | 2 |
| 29 | 44 | 0 | 3 | 8.25  | 62.52 | 3 | 1 | 1 | 0 | 2 |
| 30 | 46 | 1 | 3 | 5.42  | 71.53 | 3 | 0 | 1 | 0 | 2 |
| 31 | 36 | 1 | 4 | 9.83  | 73.32 | 3 | 1 | 1 | 1 | 2 |
| 32 | 40 | 1 | 3 | 9.92  | 78.52 | 3 | 1 | 1 | 1 | 3 |
| 33 | 44 | 1 | 3 | 5.17  | 76.96 | 3 | 0 | 1 | 0 | 3 |
| 34 | 51 | 0 | 2 | 6.33  | 22.56 | 1 | 0 | 0 | 0 | 1 |
| 35 | 58 | 1 | 1 | 11.67 | 27.62 | 1 | 0 | 0 | 0 | 1 |
| 36 | 62 | 1 | 1 | 13.75 | 23.21 | 1 | 0 | 0 | 0 | 1 |
| 37 | 53 | 0 | 3 | 10.08 | 24.85 | 1 | 0 | 0 | 0 | 1 |
| 38 | 55 | 1 | 2 | 6.25  | 20.24 | 1 | 0 | 0 | 0 | 1 |
| 39 | 44 | 1 | 3 | 9.83  | 21.40 | 1 | 0 | 0 | 0 | 2 |

|    |    |   |   |       |       |   |   |   |   |   |
|----|----|---|---|-------|-------|---|---|---|---|---|
| 40 | 47 | 0 | 3 | 17.42 | 21.35 | 1 | 1 | 0 | 0 | 1 |
| 41 | 51 | 0 | 3 | 15.58 | 23.20 | 1 | 0 | 0 | 0 | 1 |
| 42 | 48 | 1 | 3 | 11.83 | 23.17 | 1 | 0 | 0 | 1 | 1 |
| 43 | 55 | 1 | 2 | 14.25 | 23.09 | 2 | 0 | 0 | 0 | 1 |
| 44 | 50 | 0 | 3 | 13.17 | 24.02 | 2 | 0 | 0 | 1 | 1 |
| 45 | 46 | 1 | 3 | 15.83 | 25.12 | 2 | 1 | 0 | 1 | 2 |
| 46 | 45 | 1 | 3 | 13.08 | 27.87 | 2 | 1 | 0 | 0 | 2 |
| 47 | 37 | 1 | 3 | 10.5  | 28.31 | 2 | 1 | 0 | 1 | 2 |
| 48 | 33 | 1 | 3 | 10.67 | 41.69 | 2 | 1 | 0 | 1 | 2 |
| 49 | 42 | 1 | 3 | 11.33 | 80.52 | 3 | 1 | 1 | 1 | 4 |
| 50 | 49 | 1 | 3 | 5.67  | 85.71 | 3 | 1 | 1 | 0 | 4 |
| 51 | 50 | 0 | 2 | 6.42  | 20.45 | 1 | 0 | 0 | 0 | 1 |
| 52 | 50 | 0 | 3 | 8.42  | 21.23 | 1 | 0 | 0 | 0 | 1 |
| 53 | 52 | 0 | 2 | 9.58  | 21.44 | 1 | 0 | 0 | 1 | 1 |
| 54 | 60 | 1 | 1 | 11.33 | 22.25 | 1 | 0 | 0 | 0 | 1 |
| 55 | 39 | 0 | 3 | 11.75 | 22.52 | 1 | 0 | 0 | 1 | 1 |
| 56 | 45 | 1 | 2 | 9.25  | 22.62 | 1 | 0 | 0 | 0 | 1 |
| 57 | 41 | 1 | 3 | 7.17  | 23.42 | 1 | 0 | 0 | 0 | 2 |
| 58 | 49 | 1 | 3 | 9.83  | 24.23 | 1 | 0 | 0 | 0 | 1 |
| 59 | 48 | 1 | 3 | 11.83 | 24.73 | 2 | 0 | 0 | 1 | 1 |
| 60 | 50 | 1 | 3 | 10.67 | 28.76 | 2 | 1 | 0 | 1 | 2 |
| 61 | 54 | 1 | 3 | 12.42 | 21.83 | 2 | 0 | 0 | 0 | 2 |
| 62 | 40 | 0 | 3 | 13.25 | 27.37 | 2 | 1 | 0 | 0 | 2 |
| 63 | 44 | 1 | 3 | 13.83 | 42.83 | 2 | 1 | 0 | 1 | 2 |
| 64 | 36 | 1 | 4 | 9.08  | 82.56 | 3 | 1 | 1 | 0 | 4 |

|    |    |   |   |       |       |   |   |   |   |   |
|----|----|---|---|-------|-------|---|---|---|---|---|
| 65 | 43 | 0 | 2 | 15.33 | 20.47 | 1 | 0 | 0 | 1 | 1 |
| 66 | 37 | 0 | 3 | 14    | 20.25 | 1 | 0 | 0 | 1 | 1 |
| 67 | 55 | 1 | 3 | 16.75 | 19.54 | 1 | 0 | 0 | 0 | 1 |
| 68 | 60 | 1 | 1 | 12.17 | 21.40 | 1 | 0 | 0 | 1 | 1 |
| 69 | 59 | 1 | 2 | 14.08 | 23.90 | 1 | 0 | 0 | 0 | 1 |
| 70 | 61 | 1 | 1 | 13.67 | 24.40 | 1 | 0 | 0 | 0 | 1 |
| 71 | 55 | 1 | 2 | 9.58  | 27.77 | 1 | 0 | 0 | 0 | 1 |
| 72 | 47 | 0 | 2 | 6.83  | 19.66 | 1 | 0 | 0 | 0 | 1 |
| 73 | 52 | 1 | 3 | 11.25 | 20.69 | 1 | 0 | 0 | 0 | 2 |
| 74 | 54 | 1 | 2 | 15.17 | 44.87 | 2 | 0 | 0 | 0 | 1 |
| 75 | 50 | 1 | 2 | 16.42 | 48.79 | 2 | 0 | 0 | 1 | 2 |
| 76 | 49 | 1 | 3 | 13.33 | 51.51 | 2 | 0 | 0 | 1 | 2 |
| 77 | 46 | 1 | 3 | 11.75 | 54.29 | 2 | 1 | 0 | 1 | 2 |
| 78 | 41 | 0 | 2 | 15.42 | 55.63 | 2 | 1 | 0 | 1 | 2 |
| 79 | 35 | 1 | 3 | 9.5   | 55.86 | 2 | 1 | 0 | 1 | 2 |
| 80 | 37 | 0 | 3 | 8.33  | 56.92 | 2 | 0 | 0 | 1 | 2 |
| 81 | 42 | 1 | 4 | 5.25  | 78.21 | 3 | 1 | 1 | 1 | 4 |
| 82 | 50 | 0 | 2 | 7.25  | 24.36 | 1 | 0 | 0 | 0 | 1 |
| 83 | 39 | 0 | 3 | 6.58  | 19.24 | 1 | 0 | 0 | 1 | 1 |
| 84 | 44 | 0 | 3 | 11.67 | 20.95 | 1 | 0 | 0 | 0 | 1 |
| 85 | 51 | 0 | 2 | 9.83  | 22.67 | 1 | 0 | 0 | 0 | 1 |
| 86 | 46 | 0 | 3 | 12.17 | 23.51 | 1 | 0 | 0 | 0 | 1 |
| 87 | 47 | 0 | 3 | 15.08 | 24.19 | 1 | 0 | 0 | 0 | 1 |
| 88 | 33 | 0 | 3 | 14.75 | 24.44 | 1 | 0 | 0 | 1 | 1 |
| 89 | 56 | 1 | 2 | 10.83 | 23.66 | 2 | 0 | 0 | 0 | 1 |

|     |    |   |   |       |       |   |   |   |   |   |
|-----|----|---|---|-------|-------|---|---|---|---|---|
| 90  | 49 | 1 | 2 | 9.92  | 24.11 | 2 | 0 | 0 | 1 | 1 |
| 91  | 58 | 1 | 1 | 8.42  | 27.75 | 2 | 0 | 0 | 1 | 2 |
| 92  | 40 | 1 | 2 | 15.25 | 29.87 | 2 | 1 | 0 | 1 | 2 |
| 93  | 46 | 1 | 3 | 13.75 | 33.07 | 2 | 1 | 0 | 1 | 2 |
| 94  | 41 | 1 | 3 | 10.17 | 53.44 | 2 | 1 | 0 | 0 | 2 |
| 95  | 39 | 1 | 3 | 8.33  | 64.71 | 3 | 1 | 1 | 1 | 3 |
| 96  | 45 | 1 | 3 | 9.42  | 66.42 | 3 | 1 | 1 | 1 | 3 |
| 97  | 49 | 1 | 3 | 9.83  | 68.66 | 3 | 1 | 1 | 0 | 3 |
| 98  | 50 | 1 | 3 | 8.25  | 72.05 | 3 | 1 | 1 | 1 | 3 |
| 99  | 63 | 1 | 1 | 7.75  | 17.02 | 1 | 0 | 0 | 1 | 1 |
| 100 | 59 | 1 | 1 | 9.17  | 17.63 | 1 | 0 | 0 | 1 | 1 |
| 101 | 37 | 0 | 3 | 15.33 | 19.76 | 1 | 0 | 0 | 0 | 1 |
| 102 | 45 | 0 | 2 | 15.58 | 21.60 | 2 | 0 | 0 | 0 | 1 |
| 103 | 40 | 0 | 2 | 14.17 | 25.03 | 2 | 0 | 0 | 0 | 2 |
| 104 | 38 | 1 | 3 | 13.83 | 28.25 | 2 | 0 | 0 | 0 | 2 |
| 105 | 36 | 0 | 3 | 13.5  | 32.48 | 2 | 0 | 1 | 0 | 2 |
| 106 | 44 | 1 | 3 | 18.17 | 34.83 | 2 | 1 | 1 | 1 | 1 |
| 107 | 41 | 1 | 3 | 12    | 37.73 | 2 | 1 | 1 | 0 | 2 |
| 108 | 42 | 1 | 2 | 12.5  | 51.01 | 2 | 0 | 1 | 1 | 2 |
| 109 | 48 | 1 | 3 | 12.75 | 59.49 | 3 | 1 | 1 | 1 | 2 |
| 110 | 53 | 1 | 2 | 14.33 | 60.27 | 3 | 1 | 1 | 0 | 2 |
| 111 | 49 | 1 | 3 | 11.25 | 62.38 | 3 | 1 | 1 | 1 | 2 |
| 112 | 47 | 1 | 3 | 11.58 | 66.91 | 3 | 1 | 1 | 1 | 2 |
| 113 | 41 | 0 | 4 | 10.92 | 67.56 | 3 | 1 | 1 | 1 | 2 |
| 114 | 50 | 1 | 3 | 13.25 | 67.78 | 3 | 1 | 1 | 1 | 3 |

|     |    |   |   |       |       |   |   |   |   |   |
|-----|----|---|---|-------|-------|---|---|---|---|---|
| 115 | 52 | 1 | 3 | 13.08 | 67.12 | 3 | 1 | 1 | 1 | 3 |
| 116 | 40 | 1 | 4 | 7.33  | 90.61 | 3 | 1 | 1 | 1 | 4 |
| 117 | 57 | 0 | 1 | 12.5  | 20.43 | 1 | 0 | 0 | 0 | 1 |
| 118 | 61 | 1 | 1 | 17.58 | 21.18 | 1 | 0 | 0 | 0 | 1 |
| 119 | 34 | 0 | 3 | 8.33  | 22.56 | 1 | 0 | 0 | 1 | 1 |
| 120 | 39 | 0 | 2 | 11.42 | 23.22 | 1 | 0 | 0 | 0 | 1 |
| 121 | 50 | 0 | 2 | 14.58 | 23.40 | 1 | 0 | 0 | 1 | 2 |
| 122 | 55 | 1 | 2 | 13.75 | 24.13 | 1 | 0 | 0 | 0 | 1 |
| 123 | 58 | 1 | 1 | 15.83 | 24.35 | 1 | 0 | 0 | 0 | 1 |
| 124 | 56 | 1 | 1 | 15.25 | 24.73 | 2 | 0 | 0 | 0 | 1 |
| 125 | 64 | 1 | 1 | 21.42 | 24.88 | 2 | 1 | 0 | 0 | 2 |
| 126 | 41 | 1 | 3 | 9.25  | 25.53 | 2 | 0 | 0 | 1 | 2 |
| 127 | 45 | 1 | 3 | 8.17  | 25.76 | 2 | 0 | 0 | 0 | 2 |
| 128 | 50 | 1 | 3 | 11.67 | 27.30 | 2 | 1 | 0 | 0 | 2 |
| 129 | 52 | 1 | 2 | 14.42 | 27.88 | 2 | 1 | 0 | 1 | 2 |
| 130 | 39 | 1 | 3 | 6.33  | 19.64 | 2 | 0 | 0 | 1 | 3 |
| 131 | 34 | 1 | 3 | 5.42  | 20.35 | 2 | 0 | 0 | 1 | 2 |
| 132 | 32 | 1 | 3 | 2.75  | 23.91 | 2 | 0 | 0 | 0 | 2 |
| 133 | 48 | 1 | 3 | 10.58 | 26.84 | 2 | 1 | 0 | 1 | 3 |
| 134 | 27 | 1 | 4 | 2.67  | 80.42 | 3 | 1 | 1 | 1 | 4 |
| 135 | 38 | 0 | 3 | 5.75  | 22.84 | 1 | 0 | 0 | 1 | 1 |
| 136 | 60 | 1 | 1 | 16.25 | 23.22 | 1 | 0 | 0 | 1 | 1 |
| 137 | 59 | 1 | 1 | 17.83 | 23.60 | 1 | 0 | 0 | 0 | 1 |
| 138 | 55 | 1 | 2 | 16.92 | 24.33 | 1 | 0 | 0 | 1 | 1 |
| 139 | 49 | 0 | 3 | 15    | 25.49 | 1 | 0 | 0 | 0 | 1 |

|     |    |   |   |       |       |   |   |   |   |   |
|-----|----|---|---|-------|-------|---|---|---|---|---|
| 140 | 58 | 1 | 1 | 17.42 | 19.89 | 1 | 0 | 0 | 1 | 1 |
| 141 | 55 | 0 | 1 | 15.5  | 21.76 | 1 | 0 | 0 | 0 | 2 |
| 142 | 53 | 0 | 2 | 16.58 | 27.37 | 2 | 0 | 0 | 0 | 1 |
| 143 | 54 | 1 | 3 | 14.83 | 31.39 | 2 | 0 | 0 | 0 | 1 |
| 144 | 47 | 1 | 3 | 11.75 | 32.80 | 2 | 0 | 0 | 0 | 1 |
| 145 | 51 | 1 | 3 | 13.42 | 34.97 | 2 | 0 | 0 | 1 | 2 |
| 146 | 49 | 1 | 3 | 16.33 | 36.76 | 2 | 1 | 0 | 1 | 2 |
| 147 | 48 | 1 | 3 | 16.17 | 46.78 | 2 | 1 | 0 | 0 | 3 |
| 148 | 43 | 0 | 3 | 11.83 | 57.55 | 3 | 1 | 0 | 1 | 3 |
| 149 | 45 | 1 | 3 | 18.25 | 61.72 | 3 | 1 | 0 | 0 | 3 |
| 150 | 41 | 1 | 3 | 14.75 | 72.27 | 3 | 1 | 1 | 0 | 3 |
| 151 | 37 | 1 | 4 | 9.83  | 67.36 | 3 | 1 | 1 | 1 | 3 |
| 152 | 34 | 1 | 4 | 6.58  | 69.73 | 3 | 1 | 1 | 1 | 3 |
| 153 | 50 | 0 | 2 | 12.67 | 27.31 | 1 | 0 | 0 | 1 | 1 |
| 154 | 52 | 0 | 2 | 13.75 | 28.48 | 1 | 0 | 0 | 0 | 1 |
| 155 | 56 | 0 | 1 | 14.17 | 19.70 | 1 | 0 | 0 | 0 | 2 |
| 156 | 39 | 0 | 3 | 10.83 | 20.95 | 1 | 0 | 0 | 0 | 1 |
| 157 | 45 | 0 | 2 | 13.25 | 27.31 | 2 | 0 | 0 | 0 | 1 |
| 158 | 51 | 0 | 3 | 16.75 | 28.59 | 2 | 0 | 0 | 0 | 1 |
| 159 | 52 | 0 | 1 | 18.33 | 28.97 | 2 | 0 | 0 | 0 | 1 |
| 160 | 58 | 1 | 2 | 19.92 | 30.33 | 2 | 0 | 0 | 0 | 1 |
| 161 | 46 | 0 | 3 | 12.75 | 31.39 | 2 | 0 | 0 | 1 | 1 |
| 162 | 41 | 0 | 2 | 14.08 | 37.93 | 2 | 0 | 0 | 0 | 2 |
| 163 | 48 | 0 | 3 | 16.17 | 65.93 | 3 | 1 | 0 | 1 | 2 |
| 164 | 52 | 1 | 3 | 18.75 | 68.75 | 3 | 1 | 0 | 1 | 2 |

|     |    |   |   |       |       |   |   |   |   |   |
|-----|----|---|---|-------|-------|---|---|---|---|---|
| 165 | 45 | 1 | 3 | 12.58 | 69.55 | 3 | 1 | 1 | 1 | 2 |
| 166 | 37 | 1 | 4 | 10.5  | 70.36 | 3 | 1 | 1 | 1 | 3 |
| 167 | 52 | 1 | 3 | 18.25 | 68.25 | 3 | 1 | 1 | 0 | 3 |
| 168 | 35 | 1 | 4 | 9.67  | 68.93 | 3 | 1 | 1 | 0 | 3 |
| 169 | 57 | 1 | 2 | 19.83 | 24.44 | 1 | 0 | 0 | 1 | 1 |
| 170 | 51 | 0 | 2 | 17.42 | 27.51 | 1 | 0 | 0 | 0 | 2 |
| 171 | 60 | 1 | 1 | 20.08 | 28.23 | 1 | 0 | 0 | 1 | 1 |
| 172 | 58 | 0 | 1 | 23.5  | 19.75 | 1 | 0 | 0 | 1 | 1 |
| 173 | 53 | 0 | 2 | 17.75 | 21.70 | 1 | 0 | 0 | 0 | 1 |
| 174 | 47 | 0 | 2 | 8.67  | 26.89 | 1 | 0 | 0 | 1 | 1 |
| 175 | 52 | 0 | 2 | 14.58 | 27.77 | 1 | 0 | 0 | 0 | 2 |
| 176 | 53 | 1 | 2 | 15.33 | 33.87 | 2 | 0 | 0 | 1 | 1 |
| 177 | 44 | 0 | 3 | 11.83 | 41.51 | 2 | 0 | 0 | 1 | 2 |
| 178 | 45 | 1 | 3 | 14.92 | 42.47 | 2 | 0 | 0 | 1 | 2 |
| 179 | 30 | 1 | 3 | 7.25  | 44.90 | 2 | 0 | 0 | 1 | 2 |
| 180 | 36 | 0 | 3 | 5.42  | 49.82 | 2 | 0 | 0 | 1 | 2 |
| 181 | 56 | 1 | 1 | 14.67 | 50.24 | 2 | 0 | 0 | 1 | 2 |
| 182 | 51 | 1 | 3 | 15.75 | 55.60 | 2 | 0 | 0 | 0 | 2 |
| 183 | 52 | 1 | 2 | 18.83 | 56.30 | 2 | 1 | 0 | 0 | 3 |
| 184 | 55 | 1 | 1 | 19.42 | 58.41 | 2 | 1 | 0 | 1 | 2 |
| 185 | 46 | 1 | 3 | 15.33 | 64.45 | 2 | 1 | 0 | 0 | 2 |
| 186 | 39 | 1 | 4 | 8.25  | 79.94 | 3 | 1 | 1 | 1 | 4 |
| 187 | 52 | 1 | 2 | 17.25 | 20.23 | 1 | 0 | 0 | 1 | 1 |
| 188 | 58 | 1 | 2 | 15.33 | 21.44 | 1 | 0 | 0 | 0 | 2 |
| 189 | 57 | 1 | 2 | 16.17 | 22.89 | 1 | 0 | 0 | 0 | 1 |



|     |    |   |   |       |       |   |   |   |   |   |
|-----|----|---|---|-------|-------|---|---|---|---|---|
| 190 | 61 | 1 | 1 | 18.33 | 23.05 | 1 | 0 | 0 | 0 | 2 |
| 191 | 63 | 1 | 1 | 22.75 | 23.54 | 1 | 0 | 0 | 0 | 1 |
| 192 | 56 | 1 | 1 | 20.08 | 24.22 | 1 | 0 | 0 | 0 | 1 |
| 193 | 53 | 0 | 2 | 11.83 | 24.62 | 1 | 1 | 0 | 0 | 1 |
| 194 | 58 | 1 | 1 | 17.75 | 24.51 | 1 | 0 | 0 | 0 | 2 |
| 195 | 55 | 0 | 1 | 19.67 | 25.26 | 1 | 0 | 0 | 0 | 1 |
| 196 | 50 | 0 | 2 | 17.42 | 23.63 | 2 | 1 | 0 | 1 | 1 |
| 197 | 49 | 0 | 2 | 13.83 | 26.21 | 2 | 1 | 0 | 0 | 2 |
| 198 | 52 | 1 | 3 | 18    | 27.48 | 2 | 1 | 0 | 1 | 2 |
| 199 | 48 | 1 | 3 | 16.5  | 33.57 | 2 | 1 | 0 | 0 | 2 |
| 200 | 50 | 1 | 3 | 14.25 | 34.35 | 2 | 1 | 0 | 0 | 2 |
| 201 | 46 | 1 | 3 | 13.33 | 41.33 | 2 | 1 | 0 | 1 | 2 |
| 202 | 42 | 1 | 3 | 11.75 | 49.80 | 2 | 1 | 0 | 1 | 2 |
| 203 | 47 | 0 | 3 | 15.17 | 62.54 | 2 | 1 | 0 | 1 | 2 |
| 204 | 39 | 1 | 4 | 14.08 | 81.57 | 3 | 1 | 1 | 1 | 2 |
| 205 | 48 | 1 | 2 | 16.83 | 22.89 | 1 | 0 | 0 | 1 | 1 |
| 206 | 51 | 1 | 2 | 18.33 | 23.72 | 1 | 0 | 0 | 1 | 1 |
| 207 | 59 | 1 | 1 | 19.08 | 25.25 | 1 | 0 | 0 | 0 | 1 |
| 208 | 52 | 0 | 2 | 20.5  | 18.69 | 1 | 1 | 0 | 0 | 1 |
| 209 | 53 | 0 | 1 | 22.33 | 23.71 | 1 | 0 | 0 | 0 | 1 |
| 210 | 56 | 0 | 1 | 21.17 | 24.32 | 1 | 0 | 0 | 0 | 1 |
| 211 | 50 | 0 | 2 | 16.75 | 25.23 | 1 | 0 | 0 | 0 | 2 |
| 212 | 45 | 0 | 3 | 11.67 | 27.14 | 1 | 0 | 0 | 0 | 2 |
| 213 | 48 | 1 | 3 | 14.17 | 41.40 | 2 | 1 | 0 | 0 | 2 |
| 214 | 46 | 1 | 3 | 13.42 | 42.15 | 2 | 0 | 0 | 0 | 1 |

|     |    |   |   |       |       |   |   |   |   |   |
|-----|----|---|---|-------|-------|---|---|---|---|---|
| 215 | 51 | 1 | 2 | 15.58 | 45.56 | 2 | 1 | 0 | 0 | 2 |
| 216 | 47 | 1 | 3 | 16.83 | 46.43 | 2 | 1 | 0 | 0 | 2 |
| 217 | 41 | 1 | 3 | 12.42 | 48.63 | 2 | 1 | 0 | 0 | 2 |
| 218 | 39 | 1 | 3 | 11.33 | 51.95 | 2 | 1 | 0 | 1 | 2 |
| 219 | 49 | 1 | 3 | 18.25 | 84.35 | 2 | 1 | 0 | 1 | 2 |
| 220 | 44 | 0 | 3 | 13.5  | 58.72 | 2 | 1 | 0 | 1 | 3 |
| 221 | 37 | 1 | 4 | 7.5   | 78.28 | 3 | 1 | 1 | 1 | 3 |
| 222 | 62 | 1 | 1 | 17.33 | 20.58 | 1 | 0 | 0 | 1 | 1 |
| 223 | 51 | 0 | 2 | 15.17 | 21.10 | 1 | 0 | 0 | 1 | 1 |
| 224 | 53 | 0 | 2 | 16.67 | 21.75 | 1 | 0 | 0 | 1 | 1 |
| 225 | 59 | 1 | 1 | 20.42 | 23.32 | 1 | 1 | 0 | 1 | 1 |
| 226 | 36 | 0 | 3 | 3.17  | 23.97 | 1 | 0 | 0 | 1 | 2 |
| 227 | 40 | 0 | 3 | 6.67  | 24.19 | 1 | 0 | 0 | 1 | 1 |
| 228 | 52 | 0 | 2 | 14.5  | 24.95 | 1 | 0 | 0 | 1 | 1 |
| 229 | 53 | 1 | 2 | 15.25 | 21.70 | 2 | 0 | 0 | 1 | 1 |
| 230 | 55 | 1 | 1 | 16.08 | 41.45 | 2 | 1 | 0 | 1 | 2 |
| 231 | 50 | 1 | 3 | 15.67 | 42.30 | 2 | 1 | 0 | 1 | 2 |
| 232 | 36 | 1 | 3 | 8.33  | 45.57 | 2 | 0 | 0 | 1 | 2 |
| 233 | 41 | 1 | 3 | 10.25 | 46.45 | 2 | 1 | 0 | 0 | 2 |
| 234 | 46 | 0 | 3 | 12.67 | 47.34 | 2 | 1 | 0 | 1 | 2 |
| 235 | 49 | 1 | 3 | 15.17 | 49.33 | 2 | 1 | 0 | 1 | 2 |
| 236 | 48 | 1 | 3 | 16.83 | 51.63 | 2 | 1 | 0 | 0 | 2 |
| 237 | 45 | 1 | 3 | 12.92 | 52.96 | 2 | 1 | 0 | 1 | 2 |
| 238 | 44 | 1 | 3 | 11.75 | 78.37 | 3 | 1 | 1 | 1 | 3 |
| 239 | 56 | 1 | 2 | 18.67 | 24.44 | 1 | 0 | 0 | 0 | 1 |

|     |    |   |   |       |       |   |   |   |   |   |
|-----|----|---|---|-------|-------|---|---|---|---|---|
| 240 | 57 | 1 | 1 | 15.75 | 24.93 | 1 | 0 | 0 | 0 | 1 |
| 241 | 44 | 0 | 2 | 12.08 | 25.06 | 1 | 0 | 0 | 0 | 1 |
| 242 | 41 | 0 | 3 | 10.67 | 25.28 | 1 | 0 | 0 | 0 | 1 |
| 243 | 58 | 1 | 1 | 20.17 | 25.66 | 1 | 0 | 0 | 0 | 1 |
| 244 | 50 | 0 | 2 | 16.67 | 26.31 | 1 | 1 | 0 | 1 | 1 |
| 245 | 41 | 0 | 3 | 12.75 | 27.39 | 1 | 0 | 0 | 1 | 1 |
| 246 | 46 | 0 | 2 | 13.17 | 27.53 | 1 | 0 | 0 | 1 | 1 |
| 247 | 55 | 1 | 2 | 19.08 | 27.82 | 1 | 0 | 0 | 0 | 2 |
| 248 | 52 | 1 | 2 | 18.67 | 54.62 | 2 | 0 | 0 | 0 | 2 |
| 249 | 53 | 1 | 3 | 14.25 | 57.34 | 2 | 0 | 0 | 0 | 2 |
| 250 | 50 | 1 | 3 | 13.67 | 61.50 | 2 | 1 | 0 | 0 | 2 |
| 251 | 48 | 1 | 3 | 12.92 | 62.37 | 2 | 1 | 0 | 0 | 2 |
| 252 | 44 | 1 | 3 | 11.83 | 64.25 | 2 | 1 | 0 | 1 | 2 |
| 253 | 43 | 0 | 2 | 12.42 | 66.31 | 2 | 1 | 0 | 0 | 2 |
| 254 | 41 | 1 | 3 | 11.33 | 69.63 | 2 | 1 | 0 | 1 | 3 |
| 255 | 49 | 1 | 3 | 16.17 | 78.87 | 3 | 1 | 1 | 1 | 4 |
| 256 | 55 | 1 | 2 | 17.83 | 22.35 | 1 | 0 | 0 | 0 | 1 |
| 257 | 51 | 0 | 3 | 16.58 | 17.72 | 1 | 0 | 0 | 0 | 1 |
| 258 | 53 | 1 | 1 | 17.67 | 18.97 | 2 | 0 | 0 | 1 | 1 |
| 259 | 52 | 0 | 2 | 15.67 | 19.26 | 2 | 0 | 0 | 0 | 2 |
| 260 | 50 | 0 | 3 | 16.33 | 19.78 | 2 | 0 | 0 | 1 | 2 |
| 261 | 54 | 1 | 3 | 18.25 | 20.67 | 2 | 0 | 0 | 1 | 2 |
| 262 | 56 | 1 | 1 | 19.08 | 31.71 | 2 | 0 | 0 | 1 | 2 |
| 263 | 45 | 0 | 3 | 12.75 | 45.82 | 2 | 0 | 1 | 1 | 2 |
| 264 | 51 | 1 | 2 | 16.33 | 53.50 | 2 | 1 | 1 | 1 | 2 |

|     |    |   |   |       |       |   |   |   |   |   |
|-----|----|---|---|-------|-------|---|---|---|---|---|
| 265 | 55 | 1 | 2 | 14.83 | 61.34 | 3 | 1 | 1 | 1 | 2 |
| 266 | 47 | 1 | 3 | 13.92 | 62.62 | 3 | 1 | 1 | 0 | 2 |
| 267 | 34 | 1 | 3 | 8.5   | 64.42 | 3 | 0 | 1 | 0 | 2 |
| 268 | 36 | 1 | 4 | 11.25 | 65.93 | 3 | 1 | 1 | 1 | 3 |
| 269 | 50 | 1 | 3 | 16.75 | 68.59 | 3 | 1 | 1 | 0 | 3 |
| 270 | 48 | 1 | 3 | 15.33 | 70.71 | 3 | 1 | 1 | 1 | 3 |
| 271 | 51 | 1 | 3 | 9.08  | 91.26 | 3 | 1 | 1 | 1 | 4 |
| 272 | 43 | 1 | 4 | 7.33  | 91.13 | 3 | 1 | 1 | 1 | 4 |
| 273 | 52 | 0 | 2 | 16.25 | 17.63 | 1 | 0 | 0 | 0 | 1 |
| 274 | 62 | 1 | 1 | 18.92 | 18.76 | 1 | 0 | 0 | 0 | 1 |
| 275 | 60 | 1 | 1 | 20.17 | 19.53 | 1 | 0 | 0 | 0 | 1 |
| 276 | 59 | 1 | 1 | 18.67 | 20.25 | 1 | 0 | 0 | 0 | 1 |
| 277 | 51 | 0 | 2 | 15.42 | 21.93 | 1 | 0 | 0 | 0 | 1 |
| 278 | 45 | 0 | 2 | 13.33 | 22.30 | 1 | 0 | 0 | 0 | 1 |
| 279 | 40 | 0 | 3 | 5.5   | 22.97 | 1 | 0 | 0 | 0 | 2 |
| 280 | 33 | 0 | 3 | 4.25  | 23.23 | 1 | 0 | 0 | 0 | 1 |
| 281 | 54 | 1 | 2 | 14.33 | 24.32 | 1 | 0 | 0 | 1 | 1 |
| 282 | 47 | 0 | 3 | 13.75 | 31.85 | 2 | 0 | 0 | 0 | 2 |
| 283 | 40 | 1 | 3 | 9.17  | 32.32 | 2 | 0 | 0 | 1 | 2 |
| 284 | 45 | 0 | 3 | 11.08 | 33.91 | 2 | 0 | 0 | 1 | 2 |
| 285 | 51 | 1 | 2 | 15.25 | 43.06 | 2 | 0 | 0 | 1 | 2 |
| 286 | 46 | 0 | 3 | 12.75 | 43.56 | 2 | 0 | 0 | 0 | 2 |
| 287 | 33 | 0 | 3 | 5.17  | 51.41 | 2 | 0 | 0 | 0 | 2 |
| 288 | 49 | 1 | 3 | 16.25 | 57.64 | 2 | 1 | 0 | 0 | 2 |
| 289 | 32 | 1 | 4 | 6.33  | 66.53 | 2 | 0 | 1 | 1 | 3 |

|     |    |   |   |       |       |   |   |   |   |   |
|-----|----|---|---|-------|-------|---|---|---|---|---|
| 290 | 47 | 1 | 3 | 12.83 | 79.37 | 3 | 1 | 1 | 1 | 2 |
| 291 | 29 | 0 | 3 | 3.67  | 15.72 | 1 | 0 | 0 | 0 | 1 |
| 292 | 55 | 1 | 1 | 11.33 | 17.62 | 1 | 0 | 0 | 0 | 1 |
| 293 | 60 | 1 | 2 | 19.17 | 18.34 | 1 | 0 | 0 | 0 | 2 |
| 294 | 51 | 0 | 2 | 13.42 | 19.55 | 1 | 0 | 0 | 0 | 2 |
| 295 | 55 | 1 | 2 | 12.83 | 20.66 | 1 | 0 | 0 | 0 | 2 |
| 296 | 44 | 0 | 3 | 15.5  | 22.21 | 1 | 0 | 0 | 0 | 2 |
| 297 | 46 | 0 | 2 | 13.75 | 23.70 | 1 | 0 | 0 | 0 | 1 |
| 298 | 41 | 0 | 3 | 13.25 | 40.31 | 2 | 0 | 0 | 0 | 1 |
| 299 | 31 | 0 | 3 | 9.08  | 41.69 | 2 | 0 | 0 | 0 | 2 |
| 300 | 52 | 1 | 3 | 17.75 | 47.81 | 2 | 0 | 0 | 0 | 1 |
| 301 | 36 | 1 | 3 | 9.67  | 53.00 | 2 | 0 | 0 | 0 | 2 |
| 302 | 49 | 1 | 3 | 14.33 | 54.40 | 2 | 0 | 0 | 0 | 2 |
| 303 | 45 | 1 | 3 | 12.83 | 58.62 | 2 | 0 | 0 | 0 | 2 |
| 304 | 44 | 1 | 3 | 13.17 | 62.66 | 2 | 0 | 0 | 1 | 2 |
| 305 | 47 | 1 | 2 | 16.92 | 64.69 | 2 | 1 | 0 | 0 | 2 |
| 306 | 52 | 1 | 3 | 18.33 | 65.76 | 3 | 1 | 1 | 1 | 3 |
| 307 | 53 | 1 | 2 | 18.58 | 67.33 | 3 | 1 | 1 | 0 | 3 |
| 308 | 60 | 1 | 1 | 18.92 | 73.37 | 3 | 1 | 1 | 1 | 3 |
| 309 | 41 | 1 | 3 | 12.17 | 81.55 | 3 | 1 | 1 | 1 | 2 |
| 310 | 44 | 1 | 3 | 13.5  | 14.71 | 1 | 0 | 0 | 0 | 1 |
| 311 | 51 | 1 | 2 | 16.75 | 15.22 | 1 | 0 | 0 | 0 | 2 |
| 312 | 61 | 1 | 2 | 20.75 | 16.75 | 1 | 0 | 0 | 0 | 1 |
| 313 | 39 | 0 | 3 | 12.17 | 17.77 | 1 | 0 | 0 | 1 | 2 |
| 314 | 52 | 0 | 2 | 18.42 | 18.61 | 1 | 0 | 0 | 0 | 1 |

|     |    |   |   |       |       |   |   |   |   |   |
|-----|----|---|---|-------|-------|---|---|---|---|---|
| 315 | 35 | 1 | 3 | 5.33  | 31.85 | 2 | 0 | 0 | 0 | 1 |
| 316 | 37 | 0 | 3 | 6.67  | 45.31 | 2 | 0 | 0 | 0 | 2 |
| 317 | 44 | 1 | 3 | 8.17  | 47.55 | 2 | 0 | 0 | 0 | 2 |
| 318 | 50 | 1 | 2 | 13.67 | 48.53 | 2 | 0 | 0 | 1 | 2 |
| 319 | 58 | 1 | 2 | 15.75 | 51.47 | 2 | 0 | 0 | 1 | 2 |
| 320 | 55 | 1 | 1 | 15.25 | 52.50 | 2 | 0 | 0 | 0 | 2 |
| 321 | 53 | 1 | 2 | 16.17 | 54.99 | 2 | 1 | 0 | 1 | 2 |
| 322 | 49 | 1 | 3 | 14.08 | 66.36 | 3 | 1 | 1 | 1 | 3 |
| 323 | 46 | 1 | 3 | 12.67 | 67.42 | 3 | 1 | 1 | 1 | 2 |
| 324 | 36 | 1 | 3 | 9.92  | 69.76 | 3 | 1 | 1 | 0 | 3 |
| 325 | 31 | 1 | 3 | 5.67  | 70.13 | 3 | 0 | 1 | 0 | 2 |
| 326 | 38 | 1 | 4 | 10.33 | 70.81 | 3 | 1 | 1 | 1 | 3 |
| 327 | 62 | 1 | 1 | 12.33 | 16.59 | 1 | 0 | 0 | 0 | 1 |
| 328 | 63 | 1 | 1 | 14.17 | 17.32 | 1 | 0 | 0 | 0 | 1 |
| 329 | 55 | 1 | 2 | 11.08 | 18.51 | 1 | 0 | 0 | 0 | 1 |
| 330 | 49 | 1 | 2 | 8.42  | 19.90 | 1 | 0 | 0 | 1 | 1 |
| 331 | 58 | 1 | 1 | 8.58  | 20.79 | 1 | 0 | 0 | 0 | 2 |
| 332 | 45 | 0 | 2 | 9.83  | 26.64 | 2 | 1 | 0 | 0 | 1 |
| 333 | 40 | 0 | 3 | 7.17  | 29.76 | 2 | 0 | 0 | 0 | 1 |
| 334 | 43 | 0 | 3 | 6.25  | 32.05 | 2 | 0 | 0 | 1 | 1 |
| 335 | 52 | 1 | 3 | 9.33  | 37.31 | 2 | 0 | 0 | 0 | 1 |
| 336 | 53 | 1 | 2 | 8.67  | 38.55 | 2 | 0 | 0 | 0 | 2 |
| 337 | 52 | 1 | 2 | 10.5  | 41.37 | 2 | 0 | 0 | 0 | 2 |
| 338 | 55 | 1 | 1 | 11.25 | 51.86 | 2 | 1 | 0 | 1 | 2 |
| 339 | 41 | 1 | 3 | 7.75  | 53.30 | 2 | 1 | 0 | 1 | 2 |

|     |    |   |   |       |       |   |   |   |   |   |
|-----|----|---|---|-------|-------|---|---|---|---|---|
| 340 | 39 | 1 | 3 | 6.42  | 54.22 | 2 | 0 | 0 | 0 | 2 |
| 341 | 37 | 1 | 3 | 6.17  | 57.36 | 2 | 1 | 0 | 1 | 2 |
| 342 | 49 | 1 | 3 | 13.67 | 59.03 | 2 | 1 | 0 | 1 | 2 |
| 343 | 40 | 1 | 3 | 13.42 | 71.60 | 3 | 1 | 0 | 1 | 3 |
| 344 | 47 | 1 | 3 | 9.33  | 20.25 | 1 | 0 | 0 | 0 | 1 |
| 345 | 41 | 0 | 3 | 8.25  | 22.94 | 1 | 0 | 0 | 0 | 1 |
| 346 | 55 | 1 | 2 | 17.17 | 23.56 | 1 | 0 | 0 | 1 | 2 |
| 347 | 60 | 1 | 1 | 22.17 | 21.71 | 2 | 1 | 0 | 0 | 2 |
| 348 | 50 | 0 | 2 | 13.75 | 23.47 | 2 | 0 | 0 | 1 | 2 |
| 349 | 52 | 1 | 2 | 14.67 | 31.47 | 2 | 1 | 0 | 0 | 2 |
| 350 | 41 | 1 | 3 | 15.25 | 32.36 | 2 | 0 | 0 | 1 | 2 |
| 351 | 46 | 1 | 3 | 13.08 | 33.25 | 2 | 0 | 0 | 0 | 2 |
| 352 | 44 | 1 | 3 | 9.25  | 40.71 | 2 | 0 | 0 | 1 | 2 |
| 353 | 39 | 1 | 3 | 8.5   | 42.83 | 2 | 0 | 1 | 1 | 2 |
| 354 | 52 | 1 | 3 | 13.67 | 45.90 | 2 | 1 | 1 | 0 | 2 |
| 355 | 56 | 1 | 2 | 16.83 | 51.36 | 2 | 1 | 1 | 0 | 2 |
| 356 | 29 | 1 | 3 | 3.67  | 55.79 | 2 | 1 | 1 | 1 | 2 |
| 357 | 52 | 1 | 2 | 15.17 | 68.42 | 3 | 1 | 1 | 1 | 2 |
| 358 | 35 | 1 | 3 | 13.58 | 71.50 | 3 | 1 | 1 | 1 | 3 |
| 359 | 37 | 1 | 4 | 6.17  | 90.88 | 3 | 1 | 1 | 1 | 4 |
| 360 | 41 | 0 | 2 | 6.33  | 19.26 | 1 | 0 | 0 | 1 | 1 |
| 361 | 59 | 1 | 1 | 12.5  | 18.83 | 1 | 0 | 0 | 0 | 1 |
| 362 | 64 | 1 | 1 | 24.83 | 17.54 | 1 | 0 | 0 | 0 | 1 |
| 363 | 51 | 1 | 3 | 15.33 | 19.66 | 1 | 0 | 0 | 0 | 1 |
| 364 | 39 | 0 | 3 | 10.08 | 21.77 | 1 | 0 | 0 | 0 | 1 |

|     |    |   |   |       |       |   |   |   |   |   |
|-----|----|---|---|-------|-------|---|---|---|---|---|
| 365 | 48 | 1 | 3 | 15.17 | 23.27 | 1 | 0 | 0 | 0 | 1 |
| 366 | 58 | 1 | 1 | 16.25 | 24.90 | 1 | 0 | 0 | 0 | 1 |
| 367 | 36 | 0 | 3 | 10.17 | 18.64 | 1 | 0 | 0 | 0 | 2 |
| 368 | 40 | 0 | 2 | 8.33  | 20.95 | 1 | 0 | 0 | 0 | 1 |
| 369 | 53 | 1 | 2 | 13.75 | 44.87 | 2 | 0 | 0 | 0 | 2 |
| 370 | 48 | 1 | 3 | 15.33 | 46.63 | 2 | 0 | 0 | 0 | 2 |
| 371 | 39 | 1 | 3 | 12.08 | 53.90 | 2 | 1 | 0 | 0 | 2 |
| 372 | 45 | 1 | 3 | 13.83 | 56.47 | 2 | 1 | 0 | 0 | 2 |
| 373 | 30 | 0 | 3 | 5.25  | 59.51 | 2 | 0 | 1 | 1 | 2 |
| 374 | 32 | 1 | 4 | 4.58  | 85.94 | 3 | 1 | 1 | 1 | 3 |
| 375 | 43 | 1 | 3 | 5.33  | 14.73 | 1 | 0 | 0 | 0 | 1 |
| 376 | 45 | 0 | 3 | 6.83  | 15.49 | 1 | 0 | 0 | 0 | 1 |
| 377 | 44 | 0 | 2 | 8.17  | 16.40 | 1 | 0 | 0 | 0 | 2 |
| 378 | 44 | 0 | 3 | 8.42  | 17.63 | 1 | 0 | 0 | 0 | 1 |
| 379 | 50 | 1 | 2 | 12.5  | 18.83 | 1 | 0 | 0 | 1 | 1 |
| 380 | 58 | 1 | 1 | 16.83 | 20.67 | 1 | 0 | 0 | 1 | 2 |
| 381 | 36 | 1 | 3 | 5.17  | 22.90 | 1 | 0 | 0 | 0 | 2 |
| 382 | 55 | 1 | 2 | 14.75 | 23.12 | 1 | 0 | 0 | 0 | 1 |
| 383 | 49 | 0 | 2 | 13.67 | 20.55 | 1 | 0 | 0 | 0 | 2 |
| 384 | 50 | 1 | 2 | 15.83 | 31.24 | 2 | 0 | 0 | 0 | 1 |
| 385 | 41 | 0 | 3 | 11.33 | 50.46 | 2 | 0 | 0 | 0 | 2 |
| 386 | 44 | 1 | 3 | 12.5  | 60.33 | 2 | 0 | 0 | 1 | 2 |
| 387 | 46 | 1 | 3 | 13.17 | 61.72 | 2 | 0 | 0 | 0 | 2 |
| 388 | 50 | 1 | 2 | 16.42 | 64.29 | 2 | 1 | 0 | 1 | 2 |
| 389 | 44 | 1 | 2 | 11.08 | 66.44 | 2 | 1 | 0 | 1 | 2 |



|     |    |   |   |       |       |   |   |   |   |   |
|-----|----|---|---|-------|-------|---|---|---|---|---|
| 390 | 36 | 1 | 4 | 8.67  | 79.44 | 3 | 1 | 1 | 0 | 3 |
| 391 | 43 | 1 | 3 | 11.58 | 17.42 | 1 | 0 | 0 | 0 | 1 |
| 392 | 45 | 0 | 3 | 12.17 | 18.73 | 1 | 0 | 0 | 1 | 2 |
| 393 | 44 | 0 | 2 | 13.67 | 20.06 | 1 | 0 | 0 | 1 | 1 |
| 394 | 39 | 0 | 3 | 12.75 | 20.86 | 1 | 0 | 0 | 1 | 1 |
| 395 | 50 | 1 | 2 | 15.08 | 26.64 | 1 | 0 | 0 | 1 | 2 |
| 396 | 52 | 1 | 2 | 12.42 | 27.31 | 1 | 0 | 0 | 1 | 2 |
| 397 | 41 | 0 | 3 | 10.33 | 28.97 | 1 | 0 | 0 | 0 | 2 |
| 398 | 53 | 1 | 2 | 11.42 | 29.40 | 1 | 0 | 0 | 0 | 2 |
| 399 | 50 | 1 | 3 | 13.75 | 37.34 | 2 | 0 | 0 | 0 | 1 |
| 400 | 58 | 1 | 1 | 15.67 | 44.86 | 2 | 0 | 0 | 0 | 2 |
| 401 | 58 | 1 | 1 | 14.25 | 51.64 | 2 | 0 | 0 | 0 | 2 |
| 402 | 59 | 1 | 1 | 18.67 | 55.90 | 2 | 1 | 0 | 1 | 2 |
| 403 | 52 | 1 | 3 | 16.83 | 57.21 | 2 | 1 | 0 | 0 | 2 |
| 404 | 36 | 1 | 3 | 6.75  | 61.57 | 2 | 0 | 0 | 1 | 2 |
| 405 | 37 | 1 | 3 | 8.17  | 62.65 | 2 | 1 | 0 | 1 | 2 |
| 406 | 40 | 1 | 3 | 9.08  | 65.32 | 2 | 1 | 1 | 0 | 2 |
| 407 | 59 | 1 | 2 | 9.33  | 80.81 | 3 | 1 | 1 | 1 | 2 |
| 408 | 62 | 1 | 1 | 15.67 | 18.65 | 1 | 0 | 0 | 1 | 1 |
| 409 | 51 | 0 | 2 | 12.17 | 18.71 | 1 | 0 | 0 | 1 | 1 |
| 410 | 44 | 0 | 3 | 9.08  | 19.95 | 1 | 0 | 0 | 1 | 1 |
| 411 | 53 | 1 | 2 | 13.17 | 18.30 | 1 | 0 | 0 | 0 | 1 |
| 412 | 55 | 1 | 2 | 10.33 | 17.70 | 1 | 0 | 0 | 0 | 1 |
| 413 | 58 | 1 | 1 | 13.42 | 15.41 | 1 | 0 | 0 | 0 | 1 |
| 414 | 41 | 0 | 2 | 8.67  | 16.29 | 1 | 0 | 0 | 0 | 1 |

|     |    |   |   |       |       |   |   |   |   |   |
|-----|----|---|---|-------|-------|---|---|---|---|---|
| 415 | 55 | 1 | 1 | 11.92 | 18.66 | 1 | 0 | 0 | 0 | 2 |
| 416 | 47 | 0 | 2 | 7.75  | 19.57 | 1 | 0 | 0 | 0 | 2 |
| 417 | 50 | 0 | 2 | 12.33 | 27.33 | 2 | 0 | 0 | 0 | 2 |
| 418 | 59 | 1 | 1 | 14.42 | 28.60 | 2 | 0 | 0 | 0 | 2 |
| 419 | 44 | 0 | 1 | 12.75 | 28.99 | 2 | 0 | 0 | 0 | 2 |
| 420 | 52 | 1 | 3 | 13.5  | 30.44 | 2 | 0 | 0 | 0 | 1 |
| 421 | 51 | 1 | 3 | 12    | 31.80 | 2 | 0 | 0 | 0 | 1 |
| 422 | 56 | 1 | 2 | 14.25 | 33.00 | 2 | 0 | 0 | 1 | 1 |
| 423 | 57 | 1 | 1 | 15.33 | 33.96 | 2 | 0 | 0 | 0 | 2 |
| 424 | 49 | 0 | 2 | 6.33  | 18.61 | 1 | 0 | 0 | 0 | 1 |
| 425 | 55 | 0 | 2 | 9.25  | 18.70 | 1 | 0 | 0 | 0 | 1 |
| 426 | 50 | 0 | 2 | 7.17  | 18.95 | 1 | 0 | 0 | 0 | 2 |
| 427 | 46 | 0 | 2 | 10.17 | 19.50 | 1 | 0 | 0 | 1 | 1 |
| 428 | 41 | 0 | 3 | 6.33  | 14.54 | 1 | 0 | 0 | 1 | 1 |
| 429 | 57 | 1 | 1 | 15.25 | 15.45 | 1 | 0 | 0 | 0 | 2 |
| 430 | 60 | 1 | 1 | 16.83 | 16.27 | 1 | 0 | 0 | 1 | 2 |
| 431 | 49 | 0 | 2 | 12.75 | 17.30 | 1 | 0 | 0 | 0 | 2 |
| 432 | 45 | 0 | 3 | 13.17 | 18.66 | 1 | 0 | 0 | 0 | 1 |
| 433 | 53 | 0 | 2 | 18.08 | 20.00 | 1 | 0 | 0 | 1 | 2 |
| 434 | 50 | 0 | 2 | 15.67 | 27.31 | 1 | 0 | 0 | 0 | 1 |
| 435 | 44 | 0 | 3 | 12.17 | 28.63 | 1 | 0 | 0 | 0 | 2 |
| 436 | 55 | 1 | 1 | 17.83 | 37.92 | 2 | 0 | 0 | 0 | 2 |
| 437 | 52 | 1 | 2 | 15.92 | 55.83 | 2 | 0 | 0 | 0 | 2 |
| 438 | 57 | 1 | 1 | 16.33 | 61.37 | 2 | 0 | 0 | 0 | 2 |
| 439 | 45 | 1 | 3 | 12.83 | 17.62 | 1 | 0 | 0 | 0 | 1 |

|     |    |   |   |       |       |   |   |   |   |   |
|-----|----|---|---|-------|-------|---|---|---|---|---|
| 440 | 51 | 1 | 3 | 15.58 | 18.55 | 1 | 0 | 0 | 0 | 1 |
| 441 | 52 | 1 | 3 | 17.42 | 19.93 | 1 | 0 | 0 | 0 | 1 |
| 442 | 57 | 1 | 2 | 18.75 | 20.59 | 1 | 0 | 0 | 0 | 1 |
| 443 | 54 | 1 | 2 | 15.33 | 21.70 | 1 | 0 | 0 | 0 | 1 |
| 444 | 56 | 1 | 1 | 15.42 | 23.26 | 1 | 0 | 0 | 0 | 2 |
| 445 | 57 | 1 | 2 | 15.75 | 25.50 | 1 | 0 | 0 | 0 | 1 |
| 446 | 59 | 1 | 1 | 16.08 | 28.75 | 1 | 0 | 0 | 0 | 2 |
| 447 | 52 | 1 | 3 | 13.25 | 38.89 | 2 | 0 | 0 | 0 | 2 |
| 448 | 55 | 1 | 2 | 14.83 | 40.40 | 2 | 0 | 0 | 0 | 2 |
| 449 | 50 | 1 | 2 | 12.92 | 51.55 | 2 | 1 | 0 | 1 | 2 |
| 450 | 56 | 1 | 1 | 16.75 | 60.57 | 2 | 1 | 1 | 1 | 3 |
| 451 | 51 | 1 | 3 | 13.17 | 79.91 | 3 | 1 | 1 | 1 | 4 |
| 452 | 53 | 1 | 2 | 12.5  | 22.94 | 1 | 0 | 0 | 0 | 1 |
| 453 | 49 | 0 | 2 | 13.17 | 24.49 | 1 | 0 | 0 | 0 | 1 |
| 454 | 46 | 0 | 3 | 12.92 | 25.62 | 1 | 0 | 0 | 0 | 2 |
| 455 | 54 | 1 | 2 | 16.67 | 34.69 | 2 | 0 | 0 | 0 | 2 |
| 456 | 50 | 1 | 3 | 14.17 | 35.40 | 2 | 0 | 0 | 0 | 2 |
| 457 | 45 | 0 | 3 | 12.33 | 36.34 | 2 | 0 | 0 | 0 | 1 |
| 458 | 44 | 0 | 3 | 10.83 | 44.79 | 2 | 0 | 0 | 0 | 1 |
| 459 | 41 | 0 | 3 | 11.08 | 46.72 | 2 | 0 | 0 | 0 | 1 |
| 460 | 46 | 0 | 3 | 13.5  | 51.56 | 2 | 0 | 0 | 0 | 2 |
| 461 | 47 | 1 | 3 | 15.25 | 62.57 | 3 | 1 | 1 | 0 | 2 |
| 462 | 52 | 1 | 2 | 14.75 | 63.46 | 3 | 1 | 1 | 1 | 2 |
| 463 | 53 | 1 | 2 | 16.17 | 65.53 | 3 | 1 | 1 | 0 | 2 |
| 464 | 48 | 1 | 3 | 13.42 | 65.64 | 3 | 1 | 1 | 1 | 3 |

|     |    |   |   |       |       |   |   |   |   |   |
|-----|----|---|---|-------|-------|---|---|---|---|---|
| 465 | 52 | 1 | 2 | 18.75 | 67.42 | 3 | 1 | 1 | 1 | 3 |
| 466 | 50 | 1 | 3 | 19.25 | 71.35 | 3 | 1 | 1 | 1 | 3 |
| 467 | 55 | 1 | 3 | 9.17  | 91.42 | 3 | 1 | 1 | 1 | 4 |
| 468 | 51 | 1 | 2 | 10.33 | 22.85 | 1 | 0 | 0 | 0 | 1 |
| 469 | 58 | 1 | 1 | 12.83 | 23.61 | 1 | 0 | 0 | 0 | 1 |
| 470 | 56 | 1 | 1 | 13.17 | 24.64 | 1 | 0 | 0 | 0 | 1 |
| 471 | 41 | 0 | 3 | 9.67  | 25.61 | 1 | 0 | 0 | 0 | 2 |
| 472 | 45 | 0 | 2 | 5.67  | 28.69 | 2 | 0 | 0 | 0 | 1 |
| 473 | 47 | 1 | 3 | 9.33  | 31.46 | 2 | 0 | 0 | 0 | 1 |
| 474 | 50 | 1 | 3 | 12.17 | 37.32 | 2 | 1 | 0 | 0 | 2 |
| 475 | 56 | 0 | 2 | 13.08 | 39.30 | 2 | 1 | 0 | 0 | 2 |
| 476 | 49 | 0 | 2 | 13.92 | 46.55 | 2 | 1 | 0 | 0 | 2 |
| 477 | 40 | 1 | 3 | 13.5  | 47.43 | 2 | 1 | 0 | 0 | 2 |
| 478 | 35 | 1 | 3 | 6.17  | 52.55 | 2 | 0 | 0 | 0 | 2 |
| 479 | 50 | 1 | 3 | 12.75 | 55.80 | 2 | 1 | 0 | 1 | 2 |
| 480 | 52 | 1 | 3 | 16.67 | 57.27 | 2 | 1 | 0 | 1 | 2 |
| 481 | 56 | 1 | 2 | 15.83 | 69.50 | 3 | 1 | 1 | 0 | 3 |
| 482 | 44 | 1 | 3 | 13.25 | 69.76 | 3 | 1 | 1 | 0 | 3 |
| 483 | 40 | 1 | 4 | 10.17 | 72.17 | 3 | 1 | 1 | 0 | 3 |
| 484 | 59 | 1 | 1 | 12.08 | 21.68 | 1 | 0 | 0 | 0 | 1 |
| 485 | 55 | 1 | 2 | 11.33 | 22.81 | 1 | 0 | 0 | 0 | 1 |
| 486 | 46 | 0 | 3 | 9.58  | 25.53 | 1 | 0 | 0 | 1 | 2 |
| 487 | 53 | 1 | 2 | 11.75 | 27.31 | 1 | 0 | 0 | 0 | 2 |
| 488 | 57 | 1 | 1 | 13.83 | 41.91 | 2 | 0 | 0 | 1 | 2 |
| 489 | 44 | 0 | 3 | 9.92  | 43.00 | 2 | 0 | 0 | 1 | 1 |

|     |    |   |   |       |       |   |   |   |   |   |
|-----|----|---|---|-------|-------|---|---|---|---|---|
| 490 | 41 | 0 | 3 | 8.25  | 43.69 | 2 | 0 | 0 | 0 | 1 |
| 491 | 55 | 1 | 2 | 14.42 | 49.91 | 2 | 0 | 0 | 0 | 2 |
| 492 | 51 | 1 | 3 | 14.67 | 51.86 | 2 | 0 | 0 | 1 | 2 |
| 493 | 40 | 0 | 3 | 11.25 | 55.79 | 2 | 0 | 0 | 1 | 2 |
| 494 | 47 | 1 | 2 | 15.17 | 57.36 | 2 | 0 | 0 | 1 | 2 |
| 495 | 43 | 0 | 3 | 13.83 | 69.37 | 2 | 1 | 0 | 0 | 2 |
| 496 | 51 | 1 | 3 | 15.08 | 71.51 | 2 | 1 | 0 | 0 | 2 |
| 497 | 47 | 1 | 3 | 13.92 | 71.69 | 2 | 1 | 0 | 1 | 2 |
| 498 | 49 | 1 | 3 | 14    | 72.20 | 2 | 1 | 0 | 0 | 2 |
| 499 | 39 | 0 | 3 | 9.25  | 72.29 | 3 | 1 | 1 | 1 | 2 |
| 500 | 44 | 1 | 3 | 12.83 | 72.47 | 3 | 1 | 1 | 1 | 3 |
| 501 | 37 | 1 | 4 | 8.75  | 80.85 | 3 | 1 | 1 | 1 | 3 |
| 502 | 52 | 1 | 2 | 6.33  | 14.87 | 1 | 0 | 0 | 0 | 1 |
| 503 | 54 | 1 | 1 | 7.75  | 16.32 | 1 | 0 | 0 | 0 | 1 |
| 504 | 45 | 0 | 2 | 9.08  | 24.70 | 2 | 0 | 0 | 0 | 2 |
| 505 | 56 | 1 | 2 | 18.25 | 25.83 | 2 | 0 | 0 | 0 | 1 |
| 506 | 53 | 1 | 2 | 15.25 | 27.64 | 2 | 0 | 0 | 0 | 2 |
| 507 | 49 | 0 | 2 | 14.17 | 28.43 | 2 | 0 | 0 | 0 | 2 |
| 508 | 40 | 0 | 3 | 12.33 | 29.86 | 2 | 0 | 0 | 0 | 1 |
| 509 | 54 | 1 | 2 | 16.92 | 30.77 | 2 | 0 | 0 | 0 | 1 |
| 510 | 50 | 1 | 3 | 14.83 | 31.38 | 2 | 1 | 0 | 0 | 2 |
| 511 | 38 | 0 | 3 | 8.75  | 32.42 | 2 | 0 | 0 | 1 | 2 |
| 512 | 45 | 1 | 3 | 12.83 | 37.66 | 2 | 1 | 0 | 0 | 2 |
| 513 | 36 | 0 | 3 | 6.17  | 52.93 | 2 | 1 | 0 | 1 | 2 |
| 514 | 31 | 1 | 3 | 5.42  | 68.42 | 3 | 1 | 1 | 1 | 2 |

|     |    |   |   |       |       |   |   |   |   |   |
|-----|----|---|---|-------|-------|---|---|---|---|---|
| 515 | 37 | 0 | 3 | 9.33  | 69.49 | 3 | 1 | 1 | 1 | 2 |
| 516 | 44 | 0 | 2 | 14.67 | 69.73 | 3 | 1 | 1 | 1 | 3 |
| 517 | 57 | 0 | 2 | 18.17 | 71.00 | 3 | 1 | 1 | 1 | 3 |
| 518 | 52 | 0 | 2 | 16.67 | 71.85 | 3 | 1 | 1 | 1 | 3 |
| 519 | 55 | 1 | 1 | 18.33 | 68.46 | 1 | 0 | 0 | 0 | 1 |
| 520 | 50 | 1 | 3 | 14.25 | 69.54 | 1 | 0 | 0 | 1 | 1 |
| 521 | 56 | 1 | 2 | 18.17 | 17.09 | 1 | 0 | 0 | 0 | 1 |
| 522 | 57 | 1 | 2 | 19.67 | 17.67 | 1 | 0 | 0 | 0 | 1 |
| 523 | 60 | 1 | 1 | 16.75 | 18.49 | 1 | 0 | 0 | 0 | 1 |
| 524 | 44 | 0 | 3 | 13.75 | 18.76 | 1 | 0 | 0 | 0 | 1 |
| 525 | 47 | 0 | 2 | 16.33 | 20.64 | 1 | 0 | 0 | 0 | 1 |
| 526 | 33 | 0 | 3 | 8.25  | 22.95 | 1 | 0 | 0 | 0 | 1 |
| 527 | 36 | 0 | 3 | 9.17  | 29.66 | 2 | 0 | 0 | 0 | 1 |
| 528 | 40 | 0 | 3 | 6.33  | 31.34 | 2 | 0 | 0 | 0 | 2 |
| 529 | 47 | 0 | 2 | 8.75  | 33.42 | 2 | 0 | 0 | 1 | 1 |
| 530 | 52 | 1 | 2 | 16.17 | 48.65 | 2 | 1 | 0 | 0 | 2 |
| 531 | 56 | 1 | 3 | 16.33 | 52.56 | 2 | 1 | 0 | 1 | 2 |
| 532 | 51 | 1 | 3 | 16.83 | 55.39 | 2 | 1 | 0 | 0 | 2 |
| 533 | 40 | 1 | 3 | 17.5  | 61.55 | 2 | 1 | 0 | 0 | 2 |
| 534 | 29 | 1 | 4 | 2.17  | 68.54 | 2 | 0 | 0 | 0 | 2 |
| 535 | 34 | 1 | 4 | 5.42  | 70.51 | 3 | 0 | 1 | 1 | 3 |
| 536 | 38 | 0 | 3 | 6.75  | 15.99 | 1 | 0 | 0 | 0 | 1 |
| 537 | 52 | 1 | 3 | 18.33 | 18.49 | 1 | 0 | 0 | 0 | 1 |
| 538 | 53 | 1 | 2 | 17.83 | 19.93 | 1 | 0 | 0 | 0 | 1 |
| 539 | 62 | 1 | 1 | 23.42 | 21.84 | 1 | 0 | 0 | 0 | 1 |

|     |    |   |   |       |       |   |   |   |   |   |
|-----|----|---|---|-------|-------|---|---|---|---|---|
| 540 | 60 | 1 | 1 | 21.17 | 22.93 | 1 | 1 | 0 | 0 | 2 |
| 541 | 57 | 1 | 1 | 20.33 | 24.49 | 1 | 0 | 0 | 0 | 1 |
| 542 | 46 | 1 | 2 | 16.75 | 28.60 | 2 | 0 | 0 | 0 | 1 |
| 543 | 42 | 0 | 3 | 10.33 | 33.95 | 2 | 0 | 0 | 0 | 2 |
| 544 | 39 | 0 | 3 | 10.17 | 46.62 | 2 | 0 | 0 | 0 | 2 |
| 545 | 44 | 1 | 3 | 11.33 | 48.46 | 2 | 1 | 0 | 0 | 2 |
| 546 | 49 | 0 | 2 | 12.75 | 51.27 | 2 | 1 | 0 | 0 | 2 |
| 547 | 37 | 1 | 3 | 11.42 | 53.49 | 2 | 1 | 0 | 0 | 2 |
| 548 | 44 | 1 | 3 | 14.08 | 55.33 | 2 | 1 | 0 | 0 | 2 |
| 549 | 40 | 1 | 3 | 11.67 | 59.92 | 2 | 1 | 0 | 1 | 2 |
| 550 | 57 | 1 | 1 | 16.25 | 61.70 | 2 | 1 | 0 | 1 | 2 |
| 551 | 55 | 1 | 2 | 18.42 | 67.30 | 3 | 1 | 1 | 1 | 3 |
| 552 | 50 | 0 | 3 | 9.67  | 18.89 | 1 | 0 | 0 | 0 | 1 |
| 553 | 53 | 1 | 3 | 8.17  | 19.72 | 1 | 0 | 0 | 0 | 1 |
| 554 | 51 | 1 | 3 | 10.08 | 20.83 | 1 | 0 | 0 | 0 | 2 |
| 555 | 45 | 0 | 2 | 6.42  | 22.30 | 1 | 0 | 0 | 0 | 1 |
| 556 | 47 | 1 | 2 | 5.67  | 24.21 | 1 | 0 | 0 | 0 | 1 |
| 557 | 51 | 0 | 2 | 9.17  | 24.83 | 1 | 0 | 0 | 0 | 1 |
| 558 | 56 | 1 | 2 | 12.75 | 29.59 | 2 | 0 | 0 | 0 | 1 |
| 559 | 50 | 1 | 3 | 13.17 | 36.22 | 2 | 0 | 0 | 0 | 2 |
| 560 | 48 | 1 | 3 | 12.83 | 42.92 | 2 | 1 | 0 | 0 | 2 |
| 561 | 39 | 1 | 3 | 10.25 | 49.55 | 2 | 1 | 0 | 0 | 2 |
| 562 | 45 | 0 | 2 | 13.42 | 50.74 | 2 | 1 | 0 | 0 | 2 |
| 563 | 41 | 1 | 3 | 9.75  | 54.37 | 2 | 1 | 0 | 0 | 2 |
| 564 | 49 | 1 | 3 | 12.67 | 56.42 | 2 | 1 | 0 | 0 | 2 |

|     |    |   |   |       |       |   |   |   |   |   |
|-----|----|---|---|-------|-------|---|---|---|---|---|
| 565 | 56 | 1 | 2 | 15.5  | 66.60 | 2 | 1 | 0 | 1 | 2 |
| 566 | 50 | 1 | 3 | 14.25 | 67.51 | 2 | 1 | 0 | 1 | 2 |
| 567 | 55 | 1 | 2 | 16.17 | 68.87 | 3 | 1 | 1 | 1 | 3 |
| 568 | 54 | 1 | 3 | 15.08 | 17.70 | 1 | 0 | 0 | 0 | 1 |
| 569 | 50 | 1 | 2 | 14.92 | 20.36 | 1 | 0 | 0 | 0 | 1 |
| 570 | 50 | 1 | 2 | 13.08 | 21.22 | 1 | 0 | 0 | 0 | 1 |
| 571 | 56 | 1 | 2 | 13.67 | 22.13 | 1 | 0 | 0 | 0 | 2 |
| 572 | 49 | 1 | 3 | 13.17 | 27.37 | 2 | 0 | 0 | 0 | 2 |
| 573 | 59 | 1 | 1 | 18.5  | 32.65 | 2 | 0 | 0 | 0 | 1 |
| 574 | 52 | 1 | 2 | 14.25 | 15.59 | 2 | 0 | 0 | 0 | 1 |
| 575 | 50 | 1 | 2 | 13.08 | 34.41 | 2 | 0 | 0 | 1 | 2 |
| 576 | 35 | 0 | 3 | 7.67  | 35.37 | 2 | 0 | 0 | 1 | 2 |
| 577 | 41 | 0 | 3 | 9.25  | 36.35 | 2 | 0 | 0 | 0 | 2 |
| 578 | 42 | 1 | 3 | 11.33 | 37.73 | 2 | 0 | 0 | 1 | 2 |
| 579 | 45 | 0 | 3 | 10.25 | 42.49 | 2 | 0 | 0 | 0 | 2 |
| 580 | 56 | 1 | 1 | 12.33 | 43.96 | 2 | 0 | 0 | 0 | 2 |
| 581 | 47 | 1 | 3 | 12.67 | 44.21 | 2 | 0 | 0 | 1 | 2 |
| 582 | 52 | 1 | 3 | 15.75 | 66.40 | 3 | 1 | 1 | 1 | 2 |
| 583 | 53 | 1 | 2 | 15.67 | 68.70 | 3 | 1 | 1 | 1 | 3 |
| 584 | 56 | 1 | 2 | 16.25 | 69.65 | 3 | 1 | 1 | 1 | 3 |
| 585 | 44 | 1 | 3 | 13.42 | 71.08 | 3 | 1 | 1 | 1 | 3 |
| 586 | 60 | 1 | 1 | 16.5  | 22.03 | 1 | 0 | 0 | 0 | 1 |
| 587 | 56 | 1 | 1 | 14.25 | 22.55 | 1 | 0 | 0 | 0 | 1 |
| 588 | 50 | 0 | 2 | 12.75 | 23.58 | 1 | 0 | 0 | 0 | 1 |
| 589 | 48 | 0 | 2 | 11.33 | 29.64 | 2 | 0 | 0 | 0 | 2 |



|     |    |   |   |       |       |   |   |   |   |   |
|-----|----|---|---|-------|-------|---|---|---|---|---|
| 590 | 55 | 1 | 2 | 16.17 | 30.90 | 2 | 0 | 0 | 0 | 1 |
| 591 | 50 | 0 | 2 | 13.08 | 32.79 | 2 | 0 | 0 | 0 | 1 |
| 592 | 58 | 1 | 1 | 16.83 | 37.57 | 2 | 0 | 0 | 0 | 1 |
| 593 | 51 | 1 | 3 | 14.92 | 38.70 | 2 | 0 | 0 | 0 | 2 |
| 594 | 56 | 1 | 2 | 15.5  | 39.89 | 2 | 0 | 0 | 0 | 1 |
| 595 | 53 | 1 | 3 | 15.17 | 40.34 | 2 | 0 | 0 | 0 | 2 |
| 596 | 45 | 0 | 3 | 13.67 | 51.10 | 2 | 0 | 0 | 1 | 2 |
| 597 | 54 | 1 | 3 | 14.75 | 66.72 | 3 | 1 | 1 | 1 | 2 |
| 598 | 49 | 0 | 3 | 12.83 | 67.10 | 3 | 1 | 1 | 1 | 2 |
| 599 | 45 | 0 | 3 | 13.58 | 67.64 | 3 | 1 | 1 | 1 | 2 |
| 600 | 42 | 0 | 3 | 13.08 | 68.82 | 3 | 1 | 1 | 1 | 3 |
| 601 | 34 | 1 | 4 | 5.83  | 91.86 | 3 | 1 | 1 | 1 | 4 |
| 602 | 39 | 1 | 3 | 3.17  | 17.77 | 1 | 0 | 0 | 0 | 1 |
| 603 | 57 | 1 | 1 | 8.83  | 18.32 | 1 | 0 | 0 | 0 | 1 |
| 604 | 56 | 1 | 2 | 9.08  | 20.82 | 1 | 0 | 0 | 0 | 1 |
| 605 | 57 | 1 | 2 | 7.42  | 25.49 | 1 | 0 | 0 | 0 | 2 |
| 606 | 54 | 1 | 3 | 8.17  | 31.63 | 2 | 0 | 0 | 0 | 2 |
| 607 | 50 | 1 | 3 | 13.75 | 32.21 | 2 | 0 | 0 | 1 | 2 |
| 608 | 47 | 0 | 2 | 9.25  | 33.29 | 2 | 0 | 0 | 0 | 1 |
| 609 | 42 | 0 | 3 | 7.33  | 33.76 | 2 | 0 | 1 | 1 | 2 |
| 610 | 50 | 1 | 3 | 6.42  | 34.07 | 2 | 0 | 0 | 0 | 1 |
| 611 | 55 | 1 | 2 | 8.5   | 34.60 | 2 | 0 | 0 | 0 | 1 |
| 612 | 44 | 0 | 2 | 6.25  | 35.21 | 2 | 0 | 1 | 0 | 2 |
| 613 | 56 | 1 | 3 | 9.17  | 37.75 | 2 | 0 | 1 | 0 | 1 |
| 614 | 50 | 1 | 2 | 11.75 | 41.32 | 2 | 0 | 1 | 0 | 2 |

|     |    |   |   |       |       |   |   |   |   |   |
|-----|----|---|---|-------|-------|---|---|---|---|---|
| 615 | 48 | 0 | 2 | 13.08 | 49.53 | 2 | 0 | 1 | 1 | 2 |
| 616 | 53 | 1 | 2 | 8.42  | 69.04 | 3 | 0 | 1 | 1 | 2 |
| 617 | 51 | 1 | 2 | 12.75 | 69.97 | 3 | 1 | 1 | 1 | 3 |
| 618 | 55 | 1 | 3 | 8.17  | 91.28 | 3 | 1 | 1 | 1 | 4 |
| 619 | 59 | 1 | 2 | 12.83 | 18.62 | 1 | 0 | 0 | 1 | 1 |
| 620 | 62 | 1 | 1 | 14.67 | 20.69 | 1 | 0 | 0 | 1 | 1 |
| 621 | 54 | 1 | 2 | 13.17 | 33.75 | 2 | 0 | 0 | 0 | 2 |
| 622 | 50 | 1 | 3 | 12.67 | 34.42 | 2 | 0 | 0 | 1 | 1 |
| 623 | 45 | 0 | 3 | 10.25 | 34.77 | 2 | 0 | 0 | 0 | 2 |
| 624 | 40 | 0 | 3 | 9.83  | 35.81 | 2 | 0 | 0 | 1 | 1 |
| 625 | 55 | 1 | 2 | 13.42 | 37.34 | 2 | 0 | 0 | 1 | 2 |
| 626 | 50 | 1 | 3 | 12.83 | 63.79 | 3 | 1 | 1 | 1 | 2 |
| 627 | 41 | 0 | 3 | 11.92 | 64.33 | 3 | 1 | 1 | 1 | 2 |
| 628 | 44 | 1 | 3 | 12.5  | 65.51 | 3 | 1 | 1 | 1 | 2 |
| 629 | 49 | 1 | 3 | 14.17 | 66.06 | 3 | 1 | 1 | 1 | 2 |
| 630 | 38 | 1 | 4 | 10.25 | 66.49 | 3 | 1 | 1 | 1 | 3 |
| 631 | 55 | 1 | 2 | 16.25 | 66.95 | 3 | 1 | 1 | 1 | 3 |
| 632 | 48 | 1 | 3 | 13.75 | 67.35 | 3 | 1 | 1 | 1 | 3 |
| 633 | 53 | 1 | 2 | 9.83  | 91.21 | 3 | 1 | 1 | 1 | 4 |
| 634 | 44 | 0 | 2 | 10.17 | 20.22 | 1 | 0 | 0 | 0 | 1 |
| 635 | 60 | 1 | 1 | 19.33 | 22.89 | 1 | 0 | 0 | 0 | 1 |
| 636 | 57 | 1 | 1 | 17.83 | 23.21 | 1 | 0 | 0 | 1 | 1 |
| 637 | 45 | 0 | 2 | 12.83 | 23.45 | 1 | 0 | 0 | 1 | 1 |
| 638 | 37 | 0 | 3 | 10.67 | 25.50 | 1 | 0 | 0 | 0 | 1 |
| 639 | 50 | 1 | 2 | 12.42 | 26.18 | 1 | 0 | 0 | 0 | 1 |

|     |    |   |   |       |       |   |   |   |   |   |
|-----|----|---|---|-------|-------|---|---|---|---|---|
| 640 | 48 | 0 | 2 | 11.25 | 28.72 | 1 | 0 | 0 | 0 | 1 |
| 641 | 54 | 0 | 2 | 16.67 | 44.81 | 2 | 0 | 0 | 0 | 2 |
| 642 | 49 | 1 | 3 | 13.83 | 48.90 | 2 | 0 | 0 | 0 | 1 |
| 643 | 41 | 0 | 3 | 12.75 | 52.54 | 2 | 0 | 0 | 1 | 2 |
| 644 | 47 | 0 | 3 | 14.08 | 53.25 | 2 | 0 | 0 | 0 | 2 |
| 645 | 49 | 0 | 3 | 14.58 | 53.62 | 2 | 0 | 0 | 1 | 2 |
| 646 | 43 | 0 | 3 | 12.67 | 54.13 | 2 | 0 | 0 | 1 | 2 |
| 647 | 55 | 1 | 3 | 15.25 | 54.70 | 2 | 0 | 0 | 1 | 2 |
| 648 | 50 | 0 | 2 | 14.42 | 53.19 | 2 | 0 | 0 | 0 | 2 |
| 649 | 44 | 0 | 3 | 10.83 | 55.14 | 2 | 0 | 0 | 0 | 2 |
| 650 | 57 | 1 | 1 | 16.33 | 57.39 | 2 | 0 | 0 | 0 | 2 |
| 651 | 40 | 0 | 3 | 9.67  | 64.06 | 2 | 0 | 0 | 0 | 2 |
| 652 | 47 | 0 | 2 | 13.08 | 18.63 | 1 | 0 | 0 | 0 | 1 |
| 653 | 56 | 1 | 2 | 12.42 | 19.19 | 1 | 0 | 0 | 1 | 1 |
| 654 | 57 | 1 | 1 | 13.92 | 19.83 | 1 | 0 | 0 | 0 | 1 |
| 655 | 50 | 0 | 2 | 13.17 | 20.45 | 1 | 0 | 0 | 1 | 1 |
| 656 | 58 | 1 | 2 | 13.5  | 21.34 | 2 | 0 | 0 | 1 | 2 |
| 657 | 50 | 1 | 3 | 13.67 | 22.56 | 2 | 0 | 0 | 0 | 1 |
| 658 | 45 | 0 | 3 | 13.17 | 23.64 | 2 | 0 | 0 | 0 | 1 |
| 659 | 49 | 1 | 3 | 14.42 | 24.93 | 2 | 0 | 0 | 1 | 2 |
| 660 | 41 | 0 | 3 | 13.25 | 25.30 | 2 | 0 | 0 | 1 | 2 |
| 661 | 43 | 1 | 3 | 13.83 | 31.36 | 2 | 0 | 0 | 1 | 2 |
| 662 | 39 | 0 | 3 | 14.25 | 33.95 | 2 | 0 | 0 | 0 | 2 |
| 663 | 55 | 1 | 2 | 16.42 | 34.71 | 2 | 0 | 0 | 0 | 2 |
| 664 | 53 | 1 | 3 | 15.33 | 37.40 | 2 | 1 | 1 | 1 | 2 |

|     |    |   |   |       |       |   |   |   |   |   |
|-----|----|---|---|-------|-------|---|---|---|---|---|
| 665 | 50 | 1 | 3 | 14.92 | 38.83 | 2 | 1 | 1 | 1 | 2 |
| 666 | 37 | 1 | 4 | 12    | 42.51 | 2 | 0 | 1 | 0 | 2 |
| 667 | 40 | 1 | 4 | 13.83 | 47.91 | 2 | 0 | 1 | 0 | 2 |
| 668 | 42 | 1 | 4 | 13.17 | 61.44 | 3 | 1 | 1 | 1 | 3 |
| 669 | 45 | 1 | 3 | 7.25  | 91.63 | 3 | 1 | 1 | 1 | 4 |
| 670 | 64 | 1 | 1 | 16.25 | 18.35 | 1 | 0 | 0 | 0 | 1 |
| 671 | 58 | 1 | 1 | 14.67 | 17.42 | 1 | 0 | 0 | 0 | 1 |
| 672 | 55 | 1 | 2 | 14.25 | 17.76 | 1 | 0 | 0 | 1 | 1 |
| 673 | 44 | 0 | 3 | 11.67 | 18.93 | 1 | 0 | 0 | 0 | 1 |
| 674 | 56 | 1 | 2 | 15.42 | 17.78 | 2 | 0 | 0 | 1 | 1 |
| 675 | 51 | 1 | 3 | 14.83 | 31.82 | 2 | 0 | 0 | 1 | 2 |
| 676 | 44 | 0 | 3 | 12.33 | 33.03 | 2 | 1 | 0 | 0 | 2 |
| 677 | 45 | 0 | 2 | 12.17 | 33.43 | 2 | 0 | 0 | 0 | 2 |
| 678 | 39 | 0 | 3 | 11.42 | 33.90 | 2 | 0 | 0 | 0 | 2 |
| 679 | 54 | 1 | 2 | 18.08 | 36.74 | 2 | 1 | 0 | 1 | 2 |
| 680 | 50 | 1 | 3 | 19.92 | 47.92 | 2 | 1 | 1 | 0 | 2 |
| 681 | 43 | 1 | 3 | 14.83 | 54.35 | 2 | 1 | 1 | 1 | 2 |
| 682 | 45 | 0 | 4 | 15.17 | 61.48 | 3 | 1 | 1 | 1 | 2 |
| 683 | 52 | 1 | 3 | 17.67 | 61.93 | 3 | 1 | 1 | 1 | 2 |
| 684 | 47 | 1 | 3 | 13.83 | 62.52 | 3 | 1 | 1 | 1 | 2 |
| 685 | 44 | 1 | 3 | 12.92 | 64.30 | 3 | 1 | 1 | 1 | 3 |
| 686 | 53 | 1 | 2 | 16.75 | 67.44 | 3 | 1 | 1 | 1 | 3 |
| 687 | 50 | 1 | 3 | 10.17 | 92.16 | 3 | 1 | 1 | 1 | 4 |
| 688 | 40 | 0 | 2 | 9.33  | 16.60 | 1 | 0 | 0 | 0 | 1 |
| 689 | 61 | 1 | 1 | 15.42 | 17.36 | 1 | 0 | 0 | 0 | 1 |

|     |    |   |   |       |       |   |   |   |   |   |
|-----|----|---|---|-------|-------|---|---|---|---|---|
| 690 | 38 | 0 | 3 | 6.42  | 18.55 | 1 | 0 | 0 | 1 | 1 |
| 691 | 56 | 1 | 2 | 13.75 | 19.03 | 1 | 0 | 0 | 0 | 1 |
| 692 | 50 | 0 | 1 | 13.83 | 32.82 | 2 | 0 | 0 | 0 | 2 |
| 693 | 57 | 1 | 1 | 14.67 | 33.22 | 2 | 0 | 0 | 0 | 2 |
| 694 | 53 | 1 | 3 | 13.75 | 27.44 | 2 | 0 | 0 | 1 | 1 |
| 695 | 55 | 1 | 2 | 14.25 | 27.97 | 2 | 0 | 0 | 1 | 2 |
| 696 | 47 | 0 | 3 | 13.42 | 28.76 | 2 | 0 | 0 | 0 | 2 |
| 697 | 56 | 1 | 2 | 15.17 | 29.30 | 2 | 1 | 0 | 0 | 2 |
| 698 | 51 | 1 | 3 | 15.08 | 30.17 | 2 | 0 | 0 | 0 | 2 |
| 699 | 53 | 1 | 3 | 14.92 | 61.20 | 3 | 1 | 1 | 1 | 2 |
| 700 | 55 | 1 | 3 | 16.17 | 61.87 | 3 | 1 | 1 | 1 | 2 |
| 701 | 50 | 1 | 3 | 14.33 | 62.31 | 3 | 1 | 1 | 1 | 2 |
| 702 | 48 | 1 | 3 | 15.75 | 62.42 | 3 | 1 | 1 | 1 | 3 |
| 703 | 55 | 1 | 2 | 17.67 | 64.54 | 3 | 1 | 1 | 1 | 3 |
| 704 | 54 | 1 | 2 | 6.42  | 91.34 | 3 | 1 | 1 | 1 | 4 |
| 705 | 54 | 1 | 3 | 11.92 | 16.21 | 1 | 0 | 0 | 0 | 1 |
| 706 | 58 | 1 | 1 | 13.75 | 16.93 | 1 | 0 | 0 | 1 | 1 |
| 707 | 57 | 1 | 1 | 12.83 | 17.32 | 1 | 0 | 0 | 0 | 1 |
| 708 | 57 | 1 | 1 | 13.17 | 19.55 | 1 | 0 | 0 | 0 | 1 |
| 709 | 45 | 0 | 3 | 12.33 | 20.31 | 1 | 0 | 0 | 1 | 1 |
| 710 | 51 | 1 | 2 | 14.67 | 21.97 | 1 | 0 | 0 | 0 | 2 |
| 711 | 56 | 1 | 2 | 15.83 | 29.66 | 2 | 0 | 0 | 0 | 2 |
| 712 | 53 | 1 | 3 | 14.25 | 30.25 | 2 | 0 | 0 | 1 | 2 |
| 713 | 55 | 1 | 3 | 14.67 | 30.90 | 2 | 0 | 0 | 1 | 2 |
| 714 | 57 | 1 | 1 | 15.83 | 31.40 | 2 | 0 | 0 | 1 | 2 |

|     |    |   |   |       |       |   |   |   |   |   |
|-----|----|---|---|-------|-------|---|---|---|---|---|
| 715 | 52 | 1 | 3 | 13.25 | 32.19 | 2 | 0 | 0 | 1 | 1 |
| 716 | 50 | 0 | 1 | 13.42 | 42.95 | 2 | 0 | 0 | 0 | 1 |
| 717 | 54 | 1 | 2 | 14.08 | 44.32 | 2 | 0 | 0 | 0 | 2 |
| 718 | 55 | 1 | 2 | 12.92 | 44.77 | 2 | 0 | 0 | 1 | 2 |
| 719 | 53 | 0 | 2 | 13.67 | 45.11 | 2 | 0 | 0 | 0 | 2 |
| 720 | 48 | 1 | 3 | 13.5  | 71.25 | 3 | 1 | 1 | 1 | 3 |
| 721 | 46 | 0 | 3 | 8.25  | 18.61 | 1 | 0 | 0 | 0 | 1 |
| 722 | 50 | 0 | 2 | 10.33 | 19.18 | 1 | 0 | 0 | 0 | 1 |
| 723 | 48 | 0 | 3 | 6.17  | 20.22 | 1 | 0 | 0 | 1 | 1 |
| 724 | 56 | 1 | 1 | 12.67 | 20.93 | 1 | 0 | 0 | 0 | 1 |
| 725 | 55 | 1 | 2 | 12.83 | 22.48 | 1 | 0 | 0 | 1 | 2 |
| 726 | 47 | 0 | 2 | 11.17 | 23.59 | 1 | 0 | 0 | 0 | 1 |
| 727 | 51 | 1 | 3 | 12.75 | 25.53 | 1 | 0 | 0 | 0 | 1 |
| 728 | 40 | 0 | 3 | 9.83  | 27.40 | 1 | 0 | 0 | 0 | 1 |
| 729 | 53 | 0 | 1 | 13.75 | 34.87 | 2 | 0 | 0 | 1 | 1 |
| 730 | 51 | 0 | 2 | 14.17 | 36.22 | 2 | 0 | 0 | 0 | 2 |
| 731 | 49 | 1 | 3 | 13.67 | 49.35 | 2 | 0 | 0 | 1 | 2 |
| 732 | 54 | 1 | 3 | 14.83 | 53.44 | 2 | 0 | 0 | 0 | 2 |
| 733 | 45 | 0 | 3 | 12.92 | 56.23 | 2 | 0 | 0 | 1 | 2 |
| 734 | 50 | 1 | 3 | 14.25 | 64.57 | 2 | 0 | 0 | 0 | 2 |
| 735 | 44 | 0 | 3 | 12.33 | 67.34 | 2 | 1 | 0 | 0 | 2 |
| 736 | 40 | 0 | 3 | 12.17 | 63.85 | 2 | 1 | 0 | 1 | 2 |
| 737 | 45 | 1 | 3 | 11.67 | 64.49 | 2 | 1 | 0 | 0 | 2 |
| 738 | 56 | 1 | 2 | 13.67 | 68.61 | 2 | 1 | 0 | 1 | 2 |
| 739 | 59 | 1 | 1 | 15.25 | 24.46 | 1 | 0 | 0 | 0 | 1 |

|     |    |   |   |       |       |   |   |   |   |   |
|-----|----|---|---|-------|-------|---|---|---|---|---|
| 740 | 42 | 0 | 2 | 10.42 | 64.74 | 3 | 1 | 1 | 1 | 3 |
| 741 | 45 | 0 | 2 | 9.75  | 27.77 | 2 | 0 | 0 | 1 | 2 |
| 742 | 43 | 1 | 3 | 8.67  | 29.59 | 2 | 0 | 0 | 0 | 1 |
| 743 | 41 | 0 | 2 | 7.33  | 37.34 | 2 | 0 | 0 | 1 | 2 |
| 744 | 38 | 0 | 3 | 9.83  | 38.69 | 2 | 0 | 0 | 0 | 2 |
| 745 | 43 | 1 | 3 | 11.67 | 39.45 | 2 | 0 | 0 | 0 | 2 |
| 746 | 46 | 0 | 2 | 13.42 | 39.97 | 2 | 0 | 0 | 0 | 2 |
| 747 | 39 | 1 | 3 | 12.75 | 40.26 | 2 | 0 | 0 | 0 | 2 |
| 748 | 48 | 0 | 2 | 14.67 | 40.82 | 2 | 0 | 0 | 1 | 2 |
| 749 | 43 | 0 | 2 | 13.17 | 40.97 | 2 | 0 | 0 | 0 | 2 |
| 750 | 44 | 1 | 3 | 12.82 | 41.12 | 2 | 0 | 0 | 1 | 2 |
| 751 | 40 | 0 | 3 | 9.42  | 61.77 | 3 | 1 | 1 | 1 | 2 |
| 752 | 45 | 1 | 3 | 13.25 | 68.32 | 3 | 1 | 1 | 0 | 2 |
| 753 | 41 | 0 | 4 | 14.25 | 69.37 | 3 | 1 | 1 | 1 | 3 |
| 754 | 44 | 0 | 3 | 12.83 | 70.23 | 3 | 1 | 1 | 1 | 3 |
| 755 | 27 | 1 | 4 | 3.42  | 91.87 | 3 | 1 | 1 | 1 | 4 |
| 756 | 59 | 1 | 1 | 13.17 | 21.54 | 1 | 0 | 0 | 0 | 1 |
| 757 | 57 | 1 | 2 | 11.42 | 22.59 | 1 | 0 | 0 | 0 | 1 |
| 758 | 44 | 1 | 3 | 14.25 | 23.66 | 1 | 0 | 0 | 1 | 1 |
| 759 | 40 | 0 | 3 | 8.92  | 29.62 | 2 | 0 | 0 | 0 | 1 |
| 760 | 56 | 1 | 2 | 17.33 | 31.94 | 2 | 0 | 1 | 0 | 1 |
| 761 | 52 | 0 | 2 | 15.08 | 32.79 | 2 | 0 | 0 | 0 | 1 |
| 762 | 51 | 0 | 2 | 16.67 | 33.20 | 2 | 0 | 0 | 0 | 2 |
| 763 | 55 | 1 | 1 | 18.83 | 33.90 | 2 | 0 | 0 | 1 | 1 |
| 764 | 46 | 0 | 3 | 14.25 | 34.31 | 2 | 0 | 0 | 0 | 1 |

|      |       |      |      |       |       |      |      |      |      |      |
|------|-------|------|------|-------|-------|------|------|------|------|------|
| 765  | 33    | 1    | 4    | 9.33  | 63.73 | 3    | 0    | 1    | 1    | 2    |
| 766  | 37    | 1    | 4    | 14.33 | 63.66 | 3    | 1    | 1    | 1    | 2    |
| 767  | 43    | 1    | 3    | 16.17 | 64.32 | 3    | 1    | 1    | 1    | 2    |
| 768  | 34    | 1    | 4    | 12.5  | 64.91 | 3    | 1    | 1    | 1    | 3    |
| 769  | 49    | 1    | 3    | 18.83 | 65.67 | 3    | 1    | 1    | 1    | 3    |
| 770  | 46    | 1    | 3    | 18.42 | 66.70 | 3    | 1    | 1    | 1    | 3    |
| 771  | 37    | 1    | 4    | 15.58 | 67.85 | 3    | 1    | 1    | 1    | 3    |
| 772  | 33    | 0    | 4    | 9.25  | 67.97 | 3    | 1    | 1    | 1    | 3    |
| 773  | 31    | 1    | 4    | 4.5   | 91.88 | 3    | 1    | 1    | 1    | 4    |
| Mean | 47.83 | 0.67 | 2.46 | 12.85 | 64.23 | 1.83 | 0.34 | 0.21 | 0.43 | 1.78 |
| SD.  | 7.23  | 0.47 | 0.79 | 3.75  | 19.83 | 0.71 | 0.47 | 0.41 | 0.50 | 0.74 |
| Max  | 64    | 1    | 4    | 24.83 | 92.16 | 3    | 1    | 1    | 1    | 4    |
| Min  | 27    | 0    | 1    | 2.17  | 14.54 | 1    | 0    | 0    | 0    | 1    |
