# Supplementary material for: Empirical analysis of pig welfare levels and their impact on pig breeding efficiency—Based on 773 pig farmers’ survey data
Source: PubMed Central journal article supplement (PMC5744959; doi:10.1371/journal.pone.0190108), 2017-12-27
Supplement: pone.0190108.s005.pdf [file pone.0190108.s005.pdf]

## S5: Production efficiency results of the 773 pig farmers

| firm | crste | firm | crste | firm | crste | firm | crste | firm | crste | firm | crste |
|------|-------|------|-------|------|-------|------|-------|------|-------|------|-------|
| 1    | 0.984 | 130  | 0.976 | 259  | 0.963 | 388  | 0.988 | 517  | 1     | 646  | 0.955 |
| 2    | 0.942 | 131  | 0.984 | 260  | 0.949 | 389  | 0.988 | 518  | 0.988 | 647  | 0.946 |
| 3    | 0.944 | 132  | 0.978 | 261  | 0.962 | 390  | 0.997 | 519  | 1     | 648  | 0.944 |
| 4    | 0.948 | 133  | 0.972 | 262  | 0.947 | 391  | 0.949 | 520  | 1     | 649  | 0.943 |
| 5    | 0.942 | 134  | 0.966 | 263  | 0.959 | 392  | 0.953 | 521  | 0.994 | 650  | 0.944 |
| 6    | 0.947 | 135  | 0.973 | 264  | 0.96  | 393  | 0.959 | 522  | 0.99  | 651  | 0.939 |
| 7    | 0.949 | 136  | 0.973 | 265  | 0.955 | 394  | 0.965 | 523  | 0.992 | 652  | 0.94  |
| 8    | 0.957 | 137  | 1     | 266  | 0.961 | 395  | 0.969 | 524  | 0.99  | 653  | 0.96  |
| 9    | 1     | 138  | 0.985 | 267  | 0.954 | 396  | 0.978 | 525  | 0.993 | 654  | 0.967 |
| 10   | 0.978 | 139  | 0.966 | 268  | 0.956 | 397  | 0.971 | 526  | 0.99  | 655  | 0.986 |
| 11   | 0.973 | 140  | 0.959 | 269  | 0.954 | 398  | 0.976 | 527  | 0.995 | 656  | 0.986 |
| 12   | 0.956 | 141  | 0.96  | 270  | 0.957 | 399  | 0.979 | 528  | 0.995 | 657  | 0.995 |
| 13   | 0.959 | 142  | 0.955 | 271  | 0.962 | 400  | 0.986 | 529  | 0.984 | 658  | 0.98  |
| 14   | 0.973 | 143  | 0.948 | 272  | 0.965 | 401  | 0.988 | 530  | 0.989 | 659  | 0.944 |
| 15   | 0.993 | 144  | 0.948 | 273  | 0.983 | 402  | 0.977 | 531  | 0.997 | 660  | 0.943 |
| 16   | 0.972 | 145  | 0.95  | 274  | 0.979 | 403  | 0.983 | 532  | 0.99  | 661  | 0.941 |
| 17   | 0.981 | 146  | 0.962 | 275  | 0.995 | 404  | 0.984 | 533  | 0.98  | 662  | 0.938 |
| 18   | 0.978 | 147  | 0.973 | 276  | 0.968 | 405  | 0.985 | 534  | 0.982 | 663  | 0.941 |
| 19   | 0.948 | 148  | 0.963 | 277  | 0.979 | 406  | 0.99  | 535  | 0.987 | 664  | 0.947 |
| 20   | 0.938 | 149  | 0.964 | 278  | 0.962 | 407  | 0.997 | 536  | 1     | 665  | 0.952 |

|    |       |     |       |     |       |     |       |     |       |     |       |
|----|-------|-----|-------|-----|-------|-----|-------|-----|-------|-----|-------|
| 21 | 0.945 | 150 | 0.97  | 279 | 0.961 | 408 | 0.948 | 537 | 1     | 666 | 0.955 |
| 22 | 0.974 | 151 | 0.97  | 280 | 0.953 | 409 | 0.953 | 538 | 0.994 | 667 | 0.956 |
| 23 | 0.932 | 152 | 0.973 | 281 | 0.962 | 410 | 0.964 | 539 | 0.991 | 668 | 0.96  |
| 24 | 0.931 | 153 | 0.974 | 282 | 0.963 | 411 | 0.958 | 540 | 0.992 | 669 | 0.991 |
| 25 | 0.93  | 154 | 0.971 | 283 | 0.962 | 412 | 0.984 | 541 | 0.988 | 670 | 0.994 |
| 26 | 0.927 | 155 | 0.996 | 284 | 0.959 | 413 | 0.961 | 542 | 0.984 | 671 | 0.99  |
| 27 | 0.971 | 156 | 0.938 | 285 | 0.961 | 414 | 0.961 | 543 | 0.991 | 672 | 0.991 |
| 28 | 0.973 | 157 | 0.948 | 286 | 0.953 | 415 | 0.964 | 544 | 0.986 | 673 | 0.994 |
| 29 | 0.971 | 158 | 0.939 | 287 | 0.95  | 416 | 0.968 | 545 | 0.991 | 674 | 0.997 |
| 30 | 0.948 | 159 | 0.938 | 288 | 0.968 | 417 | 1     | 546 | 0.987 | 675 | 0.994 |
| 31 | 0.956 | 160 | 0.946 | 289 | 0.976 | 418 | 0.971 | 547 | 0.988 | 676 | 0.994 |
| 32 | 0.957 | 161 | 0.939 | 290 | 0.964 | 419 | 0.969 | 548 | 0.987 | 677 | 0.996 |
| 33 | 0.955 | 162 | 0.949 | 291 | 0.969 | 420 | 0.979 | 549 | 0.989 | 678 | 0.996 |
| 34 | 1     | 163 | 0.987 | 292 | 0.962 | 421 | 0.977 | 550 | 1     | 679 | 0.992 |
| 35 | 0.977 | 164 | 0.974 | 293 | 0.974 | 422 | 0.986 | 551 | 1     | 680 | 0.979 |
| 36 | 1     | 165 | 0.978 | 294 | 0.957 | 423 | 0.996 | 552 | 0.99  | 681 | 0.976 |
| 37 | 1     | 166 | 0.979 | 295 | 0.95  | 424 | 0.923 | 553 | 0.991 | 682 | 0.975 |
| 38 | 0.977 | 167 | 0.979 | 296 | 0.956 | 425 | 0.944 | 554 | 1     | 683 | 0.974 |
| 39 | 0.971 | 168 | 0.98  | 297 | 0.974 | 426 | 0.939 | 555 | 0.998 | 684 | 0.981 |
| 40 | 0.982 | 169 | 0.974 | 298 | 0.974 | 427 | 0.938 | 556 | 0.995 | 685 | 0.976 |
| 41 | 0.974 | 170 | 0.967 | 299 | 0.97  | 428 | 0.959 | 557 | 0.996 | 686 | 0.976 |
| 42 | 0.965 | 171 | 0.952 | 300 | 0.971 | 429 | 0.94  | 558 | 1     | 687 | 0.986 |
| 43 | 0.96  | 172 | 0.944 | 301 | 0.974 | 430 | 0.939 | 559 | 0.999 | 688 | 0.971 |
| 44 | 0.955 | 173 | 0.937 | 302 | 0.991 | 431 | 0.945 | 560 | 1     | 689 | 0.981 |
| 45 | 0.981 | 174 | 0.958 | 303 | 0.978 | 432 | 0.943 | 561 | 1     | 690 | 0.985 |

|    |       |     |       |     |       |     |       |     |       |     |       |
|----|-------|-----|-------|-----|-------|-----|-------|-----|-------|-----|-------|
| 46 | 0.947 | 175 | 0.996 | 304 | 0.968 | 433 | 0.94  | 562 | 0.987 | 691 | 0.964 |
| 47 | 0.964 | 176 | 0.948 | 305 | 0.969 | 434 | 0.947 | 563 | 0.982 | 692 | 0.969 |
| 48 | 0.961 | 177 | 0.962 | 306 | 0.966 | 435 | 0.939 | 564 | 0.983 | 693 | 0.97  |
| 49 | 0.953 | 178 | 0.953 | 307 | 0.967 | 436 | 0.946 | 565 | 0.987 | 694 | 0.979 |
| 50 | 0.94  | 179 | 0.957 | 308 | 0.965 | 437 | 0.952 | 566 | 0.987 | 695 | 0.974 |
| 51 | 0.961 | 180 | 0.933 | 309 | 0.966 | 438 | 0.954 | 567 | 0.993 | 696 | 0.973 |
| 52 | 0.939 | 181 | 0.931 | 310 | 0.965 | 439 | 0.959 | 568 | 0.933 | 697 | 0.974 |
| 53 | 0.945 | 182 | 0.937 | 311 | 0.966 | 440 | 0.952 | 569 | 0.935 | 698 | 0.974 |
| 54 | 0.934 | 183 | 0.963 | 312 | 0.962 | 441 | 0.953 | 570 | 0.938 | 699 | 0.977 |
| 55 | 0.955 | 184 | 0.968 | 313 | 0.962 | 442 | 0.952 | 571 | 0.94  | 700 | 0.975 |
| 56 | 0.964 | 185 | 0.973 | 314 | 0.961 | 443 | 0.955 | 572 | 0.941 | 701 | 0.975 |
| 57 | 0.993 | 186 | 0.969 | 315 | 0.971 | 444 | 0.948 | 573 | 0.944 | 702 | 0.976 |
| 58 | 0.914 | 187 | 0.978 | 316 | 0.968 | 445 | 0.953 | 574 | 0.942 | 703 | 0.977 |
| 59 | 0.922 | 188 | 0.975 | 317 | 0.967 | 446 | 0.957 | 575 | 0.942 | 704 | 0.999 |
| 60 | 0.932 | 189 | 0.957 | 318 | 0.972 | 447 | 0.97  | 576 | 0.943 | 705 | 0.939 |
| 61 | 0.955 | 190 | 0.948 | 319 | 0.975 | 448 | 0.968 | 577 | 0.983 | 706 | 0.943 |
| 62 | 0.962 | 191 | 0.948 | 320 | 0.977 | 449 | 0.96  | 578 | 0.944 | 707 | 0.94  |
| 63 | 0.963 | 192 | 0.943 | 321 | 0.965 | 450 | 0.967 | 579 | 0.94  | 708 | 0.943 |
| 64 | 0.957 | 193 | 1     | 322 | 0.965 | 451 | 0.981 | 580 | 0.943 | 709 | 0.944 |
| 65 | 0.96  | 194 | 0.968 | 323 | 0.973 | 452 | 0.933 | 581 | 0.941 | 710 | 0.944 |
| 66 | 0.944 | 195 | 0.974 | 324 | 0.977 | 453 | 0.934 | 582 | 0.946 | 711 | 0.945 |
| 67 | 0.946 | 196 | 0.986 | 325 | 0.962 | 454 | 0.945 | 583 | 0.946 | 712 | 0.943 |
| 68 | 0.937 | 197 | 1     | 326 | 0.959 | 455 | 0.934 | 584 | 0.949 | 713 | 0.942 |
| 69 | 0.939 | 198 | 0.964 | 327 | 0.989 | 456 | 0.932 | 585 | 0.952 | 714 | 0.946 |
| 70 | 0.95  | 199 | 0.966 | 328 | 0.995 | 457 | 0.942 | 586 | 0.932 | 715 | 0.942 |

|    |       |     |       |     |       |     |       |     |       |     |       |
|----|-------|-----|-------|-----|-------|-----|-------|-----|-------|-----|-------|
| 71 | 0.943 | 200 | 0.968 | 329 | 0.991 | 458 | 0.942 | 587 | 0.925 | 716 | 0.943 |
| 72 | 0.952 | 201 | 0.974 | 330 | 0.973 | 459 | 0.944 | 588 | 0.934 | 717 | 0.951 |
| 73 | 0.946 | 202 | 0.976 | 331 | 0.985 | 460 | 0.943 | 589 | 0.937 | 718 | 0.945 |
| 74 | 0.943 | 203 | 0.976 | 332 | 0.976 | 461 | 0.97  | 590 | 0.938 | 719 | 0.946 |
| 75 | 0.94  | 204 | 0.978 | 333 | 1     | 462 | 0.963 | 591 | 0.94  | 720 | 0.96  |
| 76 | 0.936 | 205 | 1     | 334 | 0.96  | 463 | 0.958 | 592 | 0.949 | 721 | 0.939 |
| 77 | 0.949 | 206 | 1     | 335 | 0.958 | 464 | 0.965 | 593 | 0.949 | 722 | 0.932 |
| 78 | 0.94  | 207 | 0.955 | 336 | 0.98  | 465 | 0.964 | 594 | 0.95  | 723 | 0.933 |
| 79 | 0.939 | 208 | 0.963 | 337 | 0.969 | 466 | 0.977 | 595 | 0.951 | 724 | 0.933 |
| 80 | 0.944 | 209 | 1     | 338 | 0.966 | 467 | 0.981 | 596 | 0.945 | 725 | 0.933 |
| 81 | 0.953 | 210 | 0.958 | 339 | 0.959 | 468 | 1     | 597 | 0.949 | 726 | 0.933 |
| 82 | 1     | 211 | 0.952 | 340 | 0.962 | 469 | 0.983 | 598 | 0.951 | 727 | 0.928 |
| 83 | 0.987 | 212 | 0.94  | 341 | 0.956 | 470 | 0.978 | 599 | 0.954 | 728 | 0.944 |
| 84 | 0.979 | 213 | 0.955 | 342 | 0.964 | 471 | 0.971 | 600 | 0.955 | 729 | 0.928 |
| 85 | 0.965 | 214 | 0.973 | 343 | 0.966 | 472 | 0.994 | 601 | 0.986 | 730 | 0.929 |
| 86 | 0.967 | 215 | 0.956 | 344 | 0.993 | 473 | 0.964 | 602 | 0.96  | 731 | 0.925 |
| 87 | 0.967 | 216 | 0.955 | 345 | 0.991 | 474 | 0.975 | 603 | 0.958 | 732 | 0.925 |
| 88 | 0.969 | 217 | 0.957 | 346 | 0.994 | 475 | 0.979 | 604 | 0.96  | 733 | 0.919 |
| 89 | 0.983 | 218 | 0.972 | 347 | 1     | 476 | 0.988 | 605 | 0.96  | 734 | 0.927 |
| 90 | 0.957 | 219 | 0.97  | 348 | 0.992 | 477 | 0.993 | 606 | 0.967 | 735 | 0.926 |
| 91 | 0.957 | 220 | 0.975 | 349 | 1     | 478 | 1     | 607 | 0.959 | 736 | 0.93  |
| 92 | 0.954 | 221 | 0.982 | 350 | 0.988 | 479 | 0.976 | 608 | 0.961 | 737 | 0.934 |
| 93 | 0.954 | 222 | 0.958 | 351 | 0.985 | 480 | 0.976 | 609 | 0.963 | 738 | 0.939 |
| 94 | 0.964 | 223 | 0.944 | 352 | 0.997 | 481 | 0.985 | 610 | 0.964 | 739 | 0.966 |
| 95 | 0.962 | 224 | 0.943 | 353 | 0.991 | 482 | 0.986 | 611 | 0.964 | 740 | 0.937 |

|     |       |     |       |     |       |     |       |     |       |     |       |
|-----|-------|-----|-------|-----|-------|-----|-------|-----|-------|-----|-------|
| 96  | 0.96  | 225 | 0.954 | 354 | 0.995 | 483 | 0.986 | 612 | 0.959 | 741 | 0.923 |
| 97  | 0.959 | 226 | 0.953 | 355 | 0.97  | 484 | 0.969 | 613 | 0.952 | 742 | 0.923 |
| 98  | 0.955 | 227 | 0.942 | 356 | 0.974 | 485 | 0.989 | 614 | 0.949 | 743 | 0.933 |
| 99  | 0.939 | 228 | 0.938 | 357 | 0.98  | 486 | 0.972 | 615 | 0.949 | 744 | 0.927 |
| 100 | 0.948 | 229 | 0.943 | 358 | 0.981 | 487 | 0.964 | 616 | 0.954 | 745 | 0.928 |
| 101 | 0.923 | 230 | 0.95  | 359 | 0.975 | 488 | 0.972 | 617 | 0.956 | 746 | 0.928 |
| 102 | 0.922 | 231 | 0.956 | 360 | 0.989 | 489 | 0.955 | 618 | 0.987 | 747 | 0.93  |
| 103 | 0.916 | 232 | 0.979 | 361 | 0.987 | 490 | 0.976 | 619 | 0.933 | 748 | 0.936 |
| 104 | 0.94  | 233 | 0.985 | 362 | 0.983 | 491 | 0.97  | 620 | 0.93  | 749 | 0.932 |
| 105 | 0.959 | 234 | 0.971 | 363 | 0.983 | 492 | 0.98  | 621 | 0.928 | 750 | 0.933 |
| 106 | 0.943 | 235 | 0.98  | 364 | 0.981 | 493 | 0.976 | 622 | 0.935 | 751 | 0.941 |
| 107 | 0.952 | 236 | 0.978 | 365 | 0.985 | 494 | 0.977 | 623 | 0.935 | 752 | 0.942 |
| 108 | 0.957 | 237 | 0.977 | 366 | 0.983 | 495 | 0.981 | 624 | 0.937 | 753 | 0.942 |
| 109 | 0.951 | 238 | 0.975 | 367 | 0.986 | 496 | 0.973 | 625 | 0.938 | 754 | 0.943 |
| 110 | 0.954 | 239 | 1     | 368 | 0.998 | 497 | 0.98  | 626 | 0.941 | 755 | 0.975 |
| 111 | 0.956 | 240 | 0.961 | 369 | 0.988 | 498 | 0.978 | 627 | 0.944 | 756 | 0.893 |
| 112 | 0.959 | 241 | 0.959 | 370 | 0.976 | 499 | 0.983 | 628 | 0.946 | 757 | 0.9   |
| 113 | 0.954 | 242 | 0.945 | 371 | 0.984 | 500 | 0.988 | 629 | 0.948 | 758 | 0.911 |
| 114 | 0.961 | 243 | 0.961 | 372 | 0.984 | 501 | 0.991 | 630 | 0.951 | 759 | 0.919 |
| 115 | 0.95  | 244 | 0.954 | 373 | 1     | 502 | 1     | 631 | 0.954 | 760 | 0.923 |
| 116 | 0.952 | 245 | 0.955 | 374 | 1     | 503 | 0.998 | 632 | 0.955 | 761 | 0.929 |
| 117 | 0.969 | 246 | 0.975 | 375 | 0.981 | 504 | 0.991 | 633 | 0.984 | 762 | 0.929 |
| 118 | 0.961 | 247 | 1     | 376 | 0.973 | 505 | 0.99  | 634 | 0.941 | 763 | 0.928 |
| 119 | 0.964 | 248 | 0.979 | 377 | 0.978 | 506 | 0.994 | 635 | 0.938 | 764 | 0.931 |
| 120 | 0.963 | 249 | 0.961 | 378 | 0.972 | 507 | 1     | 636 | 0.933 | 765 | 0.945 |

|     |       |     |       |     |       |     |       |     |       |     |       |
|-----|-------|-----|-------|-----|-------|-----|-------|-----|-------|-----|-------|
| 121 | 0.964 | 250 | 0.967 | 379 | 0.975 | 508 | 0.991 | 637 | 0.932 | 766 | 0.945 |
| 122 | 0.96  | 251 | 0.975 | 380 | 0.969 | 509 | 0.989 | 638 | 0.933 | 767 | 0.948 |
| 123 | 0.958 | 252 | 0.979 | 381 | 0.968 | 510 | 0.984 | 639 | 0.935 | 768 | 0.946 |
| 124 | 0.958 | 253 | 0.977 | 382 | 0.967 | 511 | 0.99  | 640 | 0.941 | 769 | 0.949 |
| 125 | 0.951 | 254 | 0.982 | 383 | 0.974 | 512 | 0.972 | 641 | 0.946 | 770 | 0.953 |
| 126 | 0.961 | 255 | 0.981 | 384 | 0.988 | 513 | 0.984 | 642 | 0.946 | 771 | 0.95  |
| 127 | 0.962 | 256 | 0.958 | 385 | 0.982 | 514 | 0.978 | 643 | 0.948 | 772 | 0.953 |
| 128 | 0.973 | 257 | 0.973 | 386 | 0.971 | 515 | 0.985 | 644 | 0.947 | 773 | 0.98  |
| 129 | 0.975 | 258 | 0.957 | 387 | 0.974 | 516 | 0.99  | 645 | 0.947 |     |       |
